# Supplementary material for: Site-selective nucleophilic substitution reactions of pentafluoropyridine with hydroxybenzaldehydes: synthesis of triarylmethanes comprising perfluoropyridine moieties
Source: Royal Society of Chemistry journal article supplement (doi:10.1039/d3nj01702h), 2023-01-01
Supplement: d3nj01702h1.pdf [file d3nj01702h1.pdf]

## New Journal of Chemistry

Electronic Supplementary Information

For

### Site-selective Nucleophilic Substitution Reactions of Pentafluoropyridine with Hydroxybenzaldehydes: Synthesis of Triarylmethanes Comprising Perfluoropyridine moieties

Zahra Vari,<sup>a</sup> Reza Ranjbar-Karimi<sup>\*a</sup> and Kazem Mohammadiannejad,<sup>\*b</sup>

<sup>a</sup>Department of Chemistry, Faculty of Science, Vali-e-Asr University of Rafsanjan, Rafsanjan 77176, Islamic Republic of Iran, Tel: +98-913-291-6602, E-mail: [r.ranjbarkarimi@vru.ac.ir](mailto:r.ranjbarkarimi@vru.ac.ir)

<sup>b</sup>NMR Laboratory, Faculty of Science, Vali-e-Asr University of Rafsanjan, Rafsanjan 77176,, Islamic Republic of Iran, Fax: +98-34-3131-2148; Tel: +98-913-292-8115, E-mail: [kmmohammadi@gmail.com](mailto:kmmohammadi@gmail.com) or [k.mohammadian@vru.ac.ir](mailto:k.mohammadian@vru.ac.ir)

#### 1. General information

All chemicals and solvents, unless otherwise stated, were obtained from commercial sources and were used as received. The reaction mixtures were stirred magnetically in oil bath under optimized conditions. The progress of the reactions was monitored by TLC analysis using polyester sheets pre-coated with silica gel-60 and fluorescent indicator (F-252), commercially available from Merck company. Melting points were determined using a Stuart SMP2 apparatus and are uncorrected. FT-IR spectra were recorded as KBr pellets using a Nicolet-Impact 400D spectrophotometer. <sup>1</sup>H-, <sup>13</sup>C-, and <sup>19</sup>F-NMR spectra were acquired on a Varian UNITYInova 500 MHz spectrometer using CDCl<sub>3</sub> and DMSO-d<sub>6</sub> as solvent. The chemical shifts of <sup>1</sup>H and <sup>13</sup>C spectra were recorded relative to the solvent. The chemical shifts for <sup>19</sup>F are reported in ppm relative to CFCl<sub>3</sub> as the external standard. In all cases, C-F *J*-values could not be unambiguously assigned, thus they are reported either as single signals or as ranges in <sup>13</sup>C NMR spectroscopic data.

#### 2. Spectral data of 4-((perfluoropyridinyl)oxy)benzaldehyde derivatives 3a-c

**3-((perfluoropyridin-4-yl)oxy)benzaldehyde 3a**

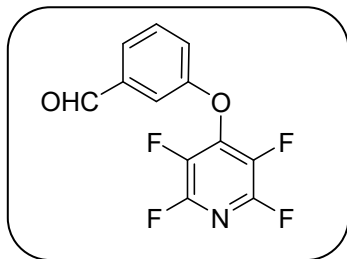

White solid. Yield 99%. MP 162-163 °C; IR (KBr)  $\tilde{\nu}$  2830, 2669, 2560, 1707, 1642, 1585  $\text{cm}^{-1}$ .  $^1\text{H}$  NMR (500 MHz,  $\text{CDCl}_3$ )  $\delta$  10.01 (s, 1H), 7.75 (d, 1H,  $J = 7.6$  Hz), 7.61 (t, 1H,  $J = 8.0$  Hz), 7.51 (s, 1H), 7.39 (dd, 1H,  $J_1 = 8.2$ ,  $J_2 = 2.7$  Hz) ppm.  $^{13}\text{C}$  NMR (126 MHz,  $\text{CDCl}_3$ )  $\delta$  190.57, 156.30, 144.98-145.55 (m), 142.72-143.66 (m), 138.26, 137.06-137.36 (m), 134.97-135.26 (m), 130.92, 127.22, 122.73, 115.62 ppm.  $^{19}\text{F}$  NMR (470 MHz,  $\text{CDCl}_3$ )  $\delta$  -87.83\_ -87.69 (m, 2F, F2,6-py), -153.95\_ -153.81 (m, 2F, F3,5-py).

**2-((perfluoropyridin-4-yl)oxy)benzaldehyde 3b**

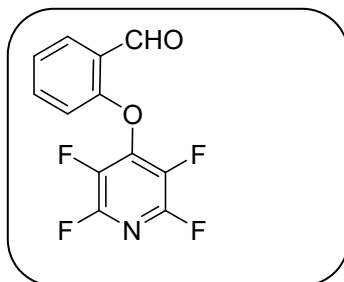

White solid. Yield 95%. MP 100-101 °C. IR (KBr)  $\tilde{\nu}$  3089, 3066, 3042, 2873, 2775, 2613, 1694  $\text{cm}^{-1}$ .  $^1\text{H}$  NMR (500 MHz,  $\text{CDCl}_3$ ):  $\delta$  10.48 (s, 1H), 7.97 (dd, 1H,  $J_1 = 7.7$ ,  $J_2 = 1.6$  Hz), 7.59-7.63 (m, 1H), 7.37 (t, 1H,  $J = 7.5$  Hz), 6.96 (d, 1H,  $J = 8.2$  Hz) ppm.  $^{13}\text{C}$  NMR (126 MHz,  $\text{CDCl}_3$ )  $\delta$  187.57, 156.94, 144.99-145.23 (m), 143.67-143.76(m), 143.07-143.30 (m), 137.07-137.16 (m), 136.79-136.92 (m), 135.77, 134.96-135.07 (m), 130.25, 126.08, 125.68, 116.47 ppm.  $^{19}\text{F}$  NMR (470 MHz,  $\text{CDCl}_3$ )  $\delta$  -87.92\_ -87.79 (m, 2F, F2,6-py), -154.57\_ -154.43 (m, 2F, F3,5-py) ppm.

**4-((perfluoropyridin-4-yl)oxy)benzaldehyde 3c**

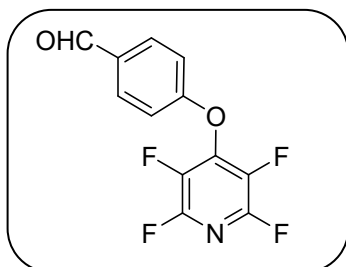

White solid. Yield 96%. MP 156-157°C. IR (KBr)  $\tilde{\nu}$  3072, 1688, 1642, 1598, 1476  $\text{cm}^{-1}$ .  $^1\text{H}$  NMR (500 MHz,  $\text{CDCl}_3$ )  $\delta$  10.00 (s, 1H), 7.95 (d, 2H,  $J = 8.8$  Hz), 7.19 (d, 2H,  $J = 8.7$  Hz) ppm.  $^{13}\text{C}$  NMR (126 MHz,  $\text{CDCl}_3$ )  $\delta$  191.84, 159.95, 144.82-145.05 (m), 142.90-143.03 (m), 137.65-137.96 (m), 135.60-135.89 (m), 133.56, 132.34, 117.24 ppm.  $^{19}\text{F}$  NMR (470 MHz,  $\text{CDCl}_3$ ):  $\delta$  -87.42\_-87.28 (m, 2F, F2,6-py), -153.41\_-153.27 (m, 2F, F3,5-py).

### 3. Spectral data of 3,3'-((3,5,6-trifluoropyridine-2,4-diyl)bis(oxy))dibenzaldehyde 4a

#### *3,3'-((3,5,6-trifluoropyridine-2,4-diyl)bis(oxy))dibenzaldehyde 4a*

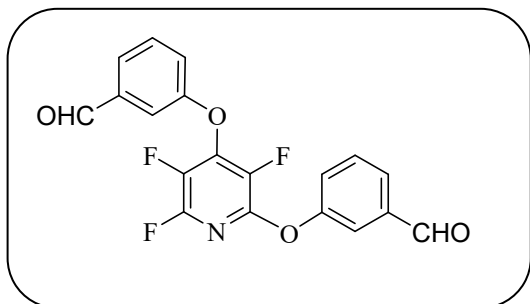

White solid. MP 104-105 °C. IR (KBr)  $\tilde{\nu}$  3059, 2924, 2848, 2823, 2740, 1698  $\text{cm}^{-1}$ .  $^1\text{H}$  NMR (500 MHz,  $\text{CDCl}_3$ )  $\delta$  10.02 (s, 1H), 10.01 (s, 1H), 7.78 (d, 1H,  $J = 7.6$  Hz), 7.73 (d, 1H,  $J = 7.6$  Hz), 7.67-7.69 (m, 1H), 7.61 (td, 2H,  $J_1 = 7.9$ ,  $J_2 = 3.1$  Hz), 7.54 (s, 1H), 7.45- 7.4 9 (m, 1 H), 7.42 (dd, 1H,  $J_1 = 8.2$ ,  $J_2 = 2.5$  Hz) ppm.  $^{13}\text{C}$  NMR (126 MHz,  $\text{CDCl}_3$ )  $\delta$  190.97, 190.83, 156.60, 153.27, 145.36-145.75 (m), 143.58-144.29 (m), 142.60-142.85 (m), 139.12-139.22 (m), 138.20, 138.07, 137.00-137.08 (m), 130.85, 130.48, 127.25, 126.95, 122.73, 120.99, 115.45 ppm.  $^{19}\text{F}$  NMR (470 MHz,  $\text{CDCl}_3$ )  $\delta$  -88.17 (dd,  $J_1 = 26.7$  Hz,  $J_2 = 21.9$  Hz, 1F), -152.06 (d,  $J = 26.7$  Hz, 1F), -157.81 (d,  $J = 21.7$  Hz, 1F) ppm.

### Spectral data of 3,3',3''-((3,5-difluoropyridine-2,4,6-triyl)tris(oxy))tribenzaldehyde 4b

#### *3,3',3''-((3,5-difluoropyridine-2,4,6-triyl)tris(oxy))tribenzaldehyde 4b*

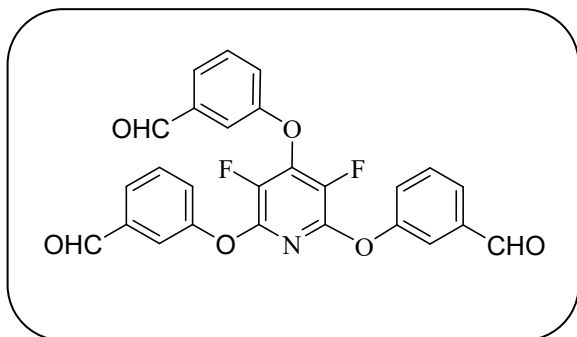

White oil. Yield 60%. IR (KBr)  $\tilde{\nu}$  2924, 2853, 2733, 1700, 1629, 1585, 1456  $\text{cm}^{-1}$ .  $^1\text{H}$  NMR (500 MHz,  $\text{CDCl}_3$ )  $\delta$  10.03 (s, 1H), 9.87 (s, 2H), 7.72 (dt, 1H,  $J_1 = 7.5$  Hz,  $J_2 = 1.1$  Hz), 7.59-7.62 (m, 3H), 7.57 (s, 1H), 7.51-7.52 (m, 1H), 7.45 (dd, 2H,  $J_1 = 8.1$ ,  $J_2 = 2.1$  Hz), 7.41 (t, 2H,  $J = 7.8$ ), 7.29-7.31 (m, 2H) ppm.  $^{13}\text{C}$  NMR (126 MHz,  $\text{CDCl}_3$ )  $\delta$  190.91, 190.86, 156.91, 153.40, 144.11-144.22 (m), 141.91-142.05 (m), 138.20, 137.66, 137.54, 135.41-135.54 (m), 130.75, 130.01, 126.93, 126.65, 122.73, 121.09, 115.31 ppm.  $^{19}\text{F}$  NMR (470 MHz,  $\text{CDCl}_3$ )  $\delta$  -155.96 (s, 2F, F3,5-py) ppm.

#### 4. Spectral data of 3,3'-((3,5-difluoro-4-(4-formylphenoxy)pyridine-2,6-diyl)bis(oxy))dibenzaldehyde 4c

##### *3,3'-((3,5-difluoro-4-(4-formylphenoxy)pyridine-2,6-diyl)bis(oxy))dibenzaldehyde 4c*

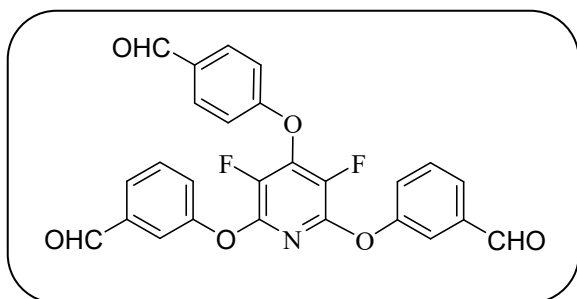

Yellow oil. Yield 53%. IR (KBr)  $\tilde{\nu}$  3023, 2924, 2850, 2734, 1700, 1629, 1588, 1482  $\text{cm}^{-1}$ .  $^1\text{H}$  NMR (500 MHz,  $\text{CDCl}_3$ )  $\delta$  9.98 (s, 1H), 9.86 (s, 2H), 7.94 (d, 2H,  $J = 8.6$  Hz), 7.60 (d, 2H,  $J = 7.5$  Hz), 7.50 (s, 2H), 7.40 (t, 2H,  $J = 7.8$  Hz), 7.28-7.30 (m, 2H), 7.24 (d, 2H,  $J = 8.5$  Hz) ppm.  $^{13}\text{C}$  NMR (126 MHz,  $\text{CDCl}_3$ )  $\delta$  190.89, 190.32, 160.44, 153.39, 144.11-144.22 (m), 137.66, 137.51, 135.43, 132.90, 131.98, 130.05, 126.90, 126.84, 120.86, 116.55 ppm;  $^{19}\text{F}$  NMR (470 MHz,  $\text{CDCl}_3$ )  $\delta$  -155.55 (s, 2F, F3,5-py) ppm.

#### 5. Spectral data of synthesized TRAMs containing tetrafluoropyridine subunits 9 a-p

##### *4-(3-(bis(3,4-dimethoxyphenyl)methyl)phenoxy)-2,3,5,6-tetrafluoropyridine 9a*

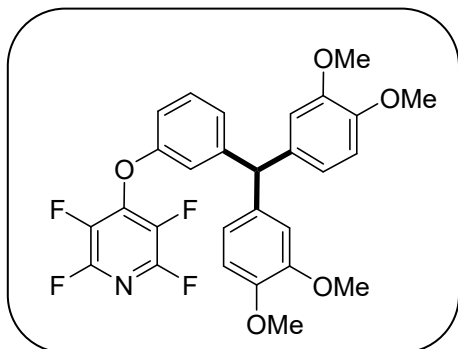

Yellow oil. Yield 93%. IR (KBr)  $\tilde{\nu}$  3015, 2936, 2836, 1642, 1606, 1504  $\text{cm}^{-1}$ .  $^1\text{H}$  NMR (500 MHz,  $\text{CDCl}_3$ )  $\delta$  7.27 (t, 1H,  $J = 7.9$  Hz), 6.99 (d, 1H,  $J = 8.3$  Hz), 6.88 (dd, 1H,  $J_1 = 8.3$ ,  $J_2 = 2.5$  Hz), 6.84 (bs, 1H), 6.78 (d, 2H,  $J = 8.3$  Hz), 6.63 (d, 2H,  $J = 2.0$  Hz), 6.58 (dd, 2H,  $J_1 = 8.3$ ,  $J_2 = 2.1$  Hz), 5.45 (s, 1H,  $\text{Ar}_3\text{CH}$ ), 3.84 (s, 6H, OMe), 3.75 (s, 6H, OMe) ppm.  $^{13}\text{C}$  NMR (125 MHz,  $\text{CDCl}_3$ )  $\delta$  155.75, 148.95, 147.76, 147.22, 144.94–145.21 (m), 144.38–144.61 (m), 143.00–143.27 (m), 136.72–136.97 (m), 135.80, 134.67–134.96 (m), 129.68, 126.32, 121.37, 117.93, 114.52, 112.72, 111.06, 55.80, 55.74, 55.53 ppm.  $^{19}\text{F}$  NMR (470 MHz,  $\text{CDCl}_3$ )  $\delta$  -89.06–-88.92 (m, 2F, F2,6-py), -154.70–-154.57 (m, 2F, F3,5-py) ppm.

**4-(2-(bis(3,4-dimethoxyphenyl)methyl)phenoxy)-2,3,5,6-tetrafluoropyridine 9b**

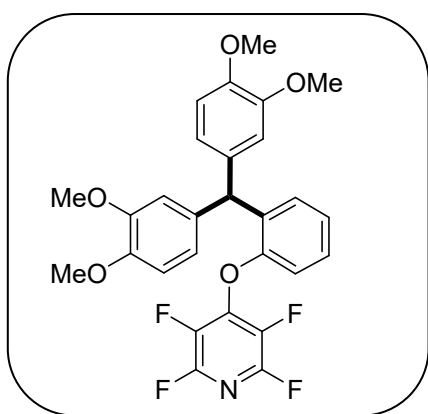

White solid. Yield 79%. MP 120-121°C. IR (KBr)  $\tilde{\nu}$  3001, 2938, 2838, 1643, 1591, 1504, 1412  $\text{cm}^{-1}$ .  $^1\text{H}$  NMR (500 MHz,  $\text{CDCl}_3$ )  $\delta$  7.22-7.26 (m, 1H), 7.16 (t, 1H,  $J = 7.6$  Hz), 7.02 (d, 1H,  $J = 7.7$  Hz), 6.94 (d, 1H,  $J = 8.1$  Hz), 6.75 (d, 2H,  $J = 8.3$  Hz), 6.65 (d, 2H,  $J = 1.8$  Hz), 6.59 (dd, 2H,  $J_1 = 8.2$ ,  $J_2 = 1.9$  Hz), 5.79 (s, 1H,  $\text{Ar}_3\text{CH}$ ), 3.83 (s, 6H, OMe), 3.74 (s, 6H, OMe) ppm.  $^{13}\text{C}$  NMR (126 MHz,  $\text{CDCl}_3$ )  $\delta$  153.26, 148.88, 147.75, 144.71-145.09 (m), 142.92-143.14 (m), 135.93-136.22 (m), 134.96, 133.85-134.15 (m), 131.08, 127.90, 125.57, 121.41, 120.90, 117.21, 112.79, 111.12, 77.31, 77.05, 76.80, 55.88, 55.79, 49.55 ppm.  $^{19}\text{F}$  NMR (470 MHz,  $\text{CDCl}_3$ ):  $\delta$  -89.77\_-89.63 (m, 2F, F2,6-py), -155.59\_-155.46 (m, 2F, F3,5-py).

**4-(4-(bis(3,4-dimethoxyphenyl)methyl)phenoxy)-2,3,5,6-tetrafluoropyridine 9c**

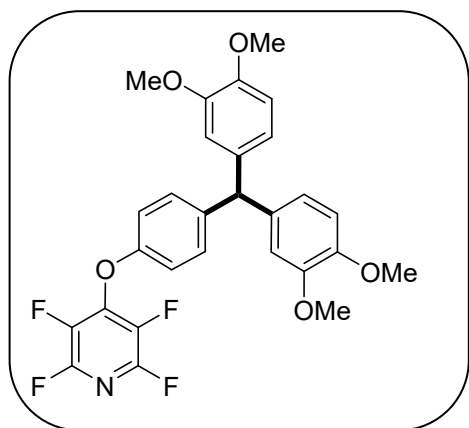

Yellow oil. Yield 91%. IR (KBr)  $\tilde{\nu}$  3016, 2935, 2836, 1642, 1600, 1501, 1416  $\text{cm}^{-1}$ .  $^1\text{H}$  NMR (500 MHz,  $\text{CDCl}_3$ )  $\delta$  7.12 (d, 2H,  $J = 8.8$  Hz), 6.98 (d, 2H,  $J = 8.5$  Hz), 6.79 (d, 2H,  $J = 8.3$  Hz), 6.64 (d, 2H,  $J = 1.6$  Hz), 6.58–6.60 (m, 2H), 5.44 (s, 1H,  $\text{Ar}_3\text{CH}$ ), 3.85 (s, 6H, OMe), 3.76 (s, 6H, OMe) ppm.  $^{13}\text{C}$  NMR (125 MHz,  $\text{CDCl}_3$ )  $\delta$  154.24, 148.96, 147.74, 144.98–145.24 (m), 144.54–144.67 (m), 143.03–143.19 (m), 141.56, 136.97–137.31 (m), 136.28, 134.84–135.22 (m), 130.75, 121.36, 116.54, 112.83, 111.14, 55.85, 55.80, 55.13 ppm.  $^{19}\text{F}$  NMR (470 MHz,  $\text{CDCl}_3$ )  $\delta$  -88.94–-88.80 (m, 2F, F2,6-py), -154.63–-154.50 (m, 2F, F3,5-py) ppm.

**4-(4-(bis(2-methoxy-5-methylphenyl)methyl)phenoxy)-2,3,5,6-tetrafluoropyridine 9d**

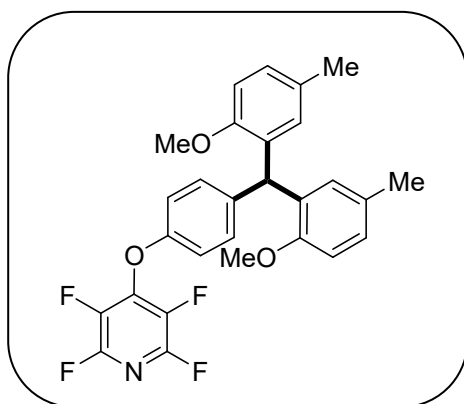

White solid Yield 87%. MP 118 °C. IR (KBr)  $\tilde{\nu}$  2995, 2917, 2836, 1642, 1605, 1500, 1477  $\text{cm}^{-1}$ .  $^1\text{H}$  NMR (500 MHz,  $\text{CDCl}_3$ )  $\delta$  7.14 (d, 2H,  $J = 8.8$  Hz), 7.04–7.09 (m, 2H), 7.00 (d, 2H,  $J = 8.6$  Hz), 6.83 (d, 2H,  $J = 8.2$  Hz), 6.68 (bs, 2H), 6.22 (s, 1H,  $\text{Ar}_3\text{CH}$ ), 3.71 (s, 6H, OMe), 2.27 (s, 6H, Me) ppm.  $^{13}\text{C}$  NMR (125 MHz,  $\text{CDCl}_3$ ):  $\delta$  (ppm) 155.31, 153.93, 145.07–145.34 (m), 144.87–145.00 (m), 143.14–143.40 (m), 141.66, 137.03–137.34 (m), 134.94–135.25 (m), 132.05, 130.75, 130.66, 129.36, 127.81, 116.33,

111.12, 55.88, 42.78, 20.72 ppm.  $^{19}\text{F}$  NMR (470 MHz,  $\text{CDCl}_3$ )  $\delta$  -89.19–89.05 (m, 2F, F2,6-py), -154.71–154.58 (m, 2F, F3,5-py) ppm.

**4-(3-(bis(2-methoxy-5-methylphenyl)methyl)phenoxy)-2,3,5,6-tetrafluoropyridine 9e**

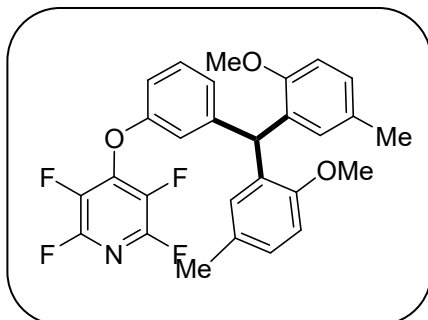

White solid. Yield 92%. MP 118-119 °C. IR (KBr)  $\tilde{\nu}$  3029, 2999, 2835, 1642, 1585, 1500, 1468  $\text{cm}^{-1}$ .  $^1\text{H}$  NMR (500 MHz,  $\text{DMSO-d}_6$ )  $\delta$  7.29 (t, 1H,  $J = 8.0$  Hz), 7.09 (dd, 1H,  $J_1 = 8.1$ ,  $J_2 = 2.5$  Hz), 6.99 (dd, 2H,  $J_1 = 8.3$ ,  $J_2 = 1.9$  Hz), 6.78–6.89 (m, 4H), 6.50 (d, 2H,  $J = 1.9$  Hz), 6.03 (s, 1H,  $\text{Ar}_3\text{CH}$ ), 3.59 (s, 6H, OMe), 2.11 (s, 6H, Me) ppm.  $^{13}\text{C}$  NMR (125 MHz,  $\text{DMSO-d}_6$ )  $\delta$  155.87, 155.17, 146.98, 144.73–145.04 (m, C2,6-Py), 144.19–144.49 (m, C3,5-Py), 143.142.71–143.13 (m, C4-Py), 131.37, 130.26, 130.04, 128.94, 128.34, 126.19, 117.80, 114.64, 111.67, 56.03, 42.97, 20.75 ppm.  $^{19}\text{F}$  NMR (470 MHz,  $\text{CDCl}_3$ ):  $\delta$  (ppm) -91.08 (m, 2F, F2,6-py), -155.43 (m, 2F, F3,5-py) ppm.

**4-(4-(bis(4-methoxyphenyl)methyl)phenoxy)-2,3,5,6-tetrafluoropyridine 9f**

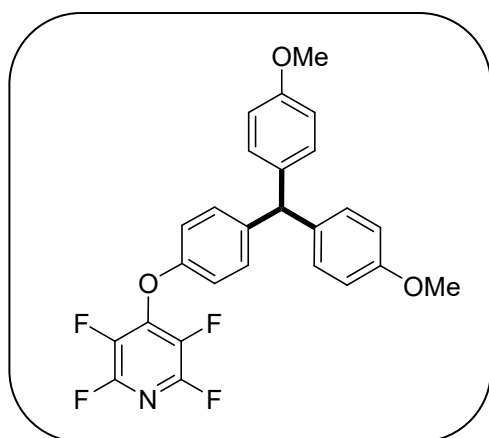

White solid. Yield 77%. MP 95-96 °C. IR (KBr)  $\tilde{\nu}$  3004, 2875, 1641, 1502, 1247  $\text{cm}^{-1}$ .  $^1\text{H}$  NMR (500 MHz,  $\text{CDCl}_3$ )  $\delta$  7.12 (d, 2H,  $J = 8.8$  Hz), 7.02 (d, 4H,  $J = 8.8$  Hz), 6.98 (d, 2H,  $J = 8.7$  Hz), 6.85 (d, 4H,  $J$

= 8.8 Hz), 5.47 (s, 1H, Ar<sub>3</sub>CH), 3.80 (s, 6H, OMe) ppm. <sup>13</sup>C NMR (126 MHz, CDCl<sub>3</sub>) δ 158.18, 154.18, 145.12–145.26 (m), 144.57–144.62 (m), 143.33, 143.06–143.22 (m), 141.79, 135.97, 130.74, 130.16, 116.48, 113.81, 55.22, 54.47 ppm. <sup>19</sup>F NMR (470 MHz, CDCl<sub>3</sub>) δ -88.85–-88.72 (m, 2F, F2,6-py), -154.43–-154.30 (m, 2F, F3,5-py) ppm.

**4-(3-(bis(4-methoxyphenyl)methyl)phenoxy)-2,3,5,6-tetrafluoropyridine 9g**

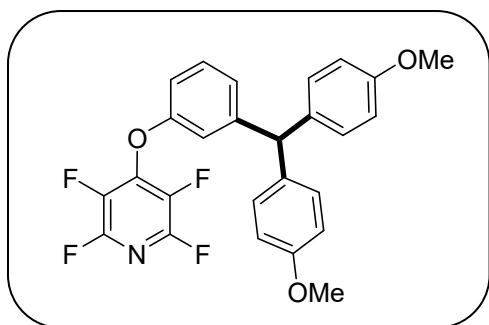

Yellow oil. Yield 83%. IR (KBr)  $\tilde{\nu}$  3004, 2955, 2837, 1641, 1610, 1505 cm<sup>-1</sup>. <sup>1</sup>H NMR (500 MHz, CDCl<sub>3</sub>) δ 7.29 (t, 1H, *J* = 8.0 Hz), 6.98–7.05 (m, 4H), 6.83–6.91 (m, 7H), 5.48 (s, 1H, Ar<sub>3</sub>CH), 3.80 (s, 6H, OMe) ppm. <sup>13</sup>C NMR (126 MHz, CDCl<sub>3</sub>) δ 158.26, 155.75, 147.50, 145.00–145.26 (m), 144.37–144.59 (m), 143.16–143.22 (m), 135.52, 130.19, 129.66, 126.25, 117.88, 114.30, 113.82, 55.21, 54.89 ppm. <sup>19</sup>F NMR (470 MHz, CDCl<sub>3</sub>) δ -88.97–-88.84 (m, 2F, F2,6-Py), -154.41–-154.28 (m, 2F, F3,5-Py) ppm.

**2,2'-((4-((perfluoropyridin-4-yl)oxy)phenyl)methylene)bis(4-(tert-butyl)phenol) 9h**

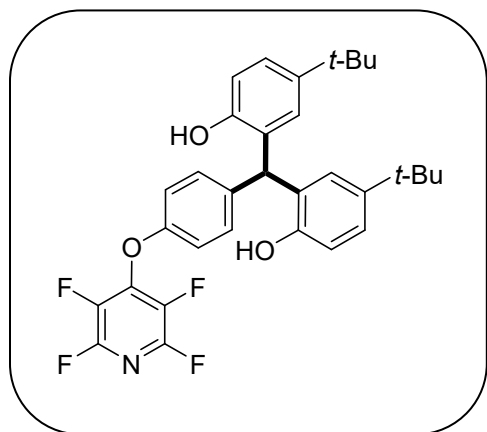



Yellow oil. Yield 76%. IR (KBr)  $\tilde{\nu}$  3405, 2962, 2907, 1640, 1603  $\text{cm}^{-1}$ , 1499;  $^1\text{H}$  NMR (500 MHz,  $\text{CDCl}_3$ )  $\delta$  7.19 (d, 2H,  $J = 8.7$  Hz), 7.16 (dd, 2H,  $J_1 = 8.6$ ,  $J_2 = 2.6$  Hz), 7.02 (d, 2H,  $J = 8.5$  Hz), 6.97 (d, 2H,  $J = 2.3$  Hz), 6.75 (d, 2H,  $J = 8.4$  Hz), 6.00 (s, 1H,  $\text{Ar}_3\text{CH}$ ), 5.55 (s, 2H), 1.20 (s, 18H, Me) ppm.  $^{13}\text{C}$  NMR (125 MHz,  $\text{CDCl}_3$ )  $\delta$  154.35, 150.89, 145.04-145.30 (m), 144.54-144.79 (m), 143.92, 143.09-143.24 (m), 139.31, 136.87-137.02 (m), 134.78-135.12 (m), 130.72, 128.15, 127.22, 124.79, 116.70, 115.66, 43.62, 34.11, 31.3 ppm.  $^{19}\text{F}$  NMR (470 MHz,  $\text{CDCl}_3$ )  $\delta$  -88.94--88.80 (m, 2F, F2,6-py), -154.64--154.51 (m, 2F, F3,5-py) ppm.

***2,2'-((3-((perfluoropyridin-4-yl)oxy)phenyl)methylene)bis(4-(tert-butyl)phenol) 9i***

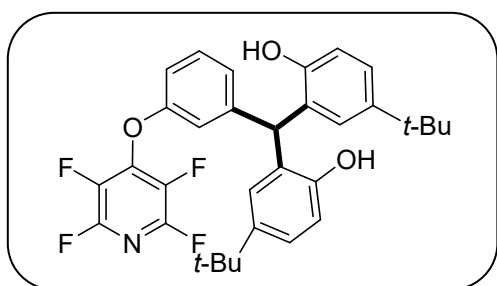

Yellow oil. Yield 81%. IR (KBr)  $\tilde{\nu}$  3387, 2962, 2907, 1640, 1608, 1501  $\text{cm}^{-1}$ .  $^1\text{H}$  NMR (500 MHz,  $\text{CDCl}_3$ )  $\delta$  7.32 (t, 1H,  $J = 8.0$  Hz), 7.14 (dd, 2H,  $J_1 = 8.4$ ,  $J_2 = 2.4$  Hz), 7.06 (d, 1H,  $J = 7.8$  Hz), 6.97 (d, 1H,  $J = 2.3$  Hz), 6.95 (d, 2H,  $J = 2.3$  Hz), 6.86 (s, 1H), 6.75 (d, 2H,  $J = 8.4$  Hz), 6.01 (s, 1H,  $\text{Ar}_3\text{CH}$ ), 2.18 (s, 2H, OH), 1.18 (s, 18H, Me) ppm.  $^{13}\text{C}$  NMR (126 MHz,  $\text{CDCl}_3$ )  $\delta$  155.92, 152.86, 150.92, 145.20, 143.90, 143.01-143.24 (m), 136.86-137.15 (m), 134.77-135.01 (m), 129.74, 127.82, 127.12, 126.25, 124.81, 117.61, 115.63, 114.93, 43.89, 34.05, 31.29 ppm.  $^{19}\text{F}$  NMR (470 MHz,  $\text{CDCl}_3$ )  $\delta$  -88.92--88.79 (m, 2F, F2,6-Py), -154.63--154.50 (m, 2F, F3,5-Py) ppm.

***4,4'-((4-((perfluoropyridin-4-yl)oxy)phenyl)methylene)diphenol 9j***

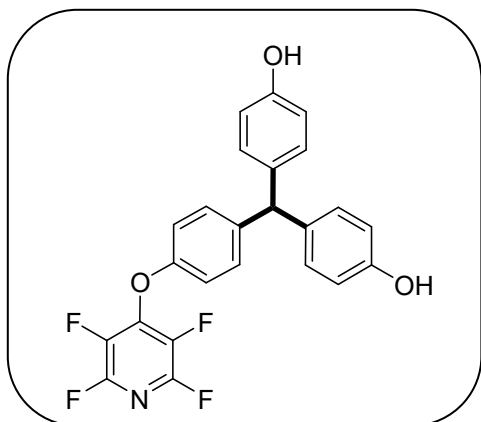

Yellow oil. Yield 72%. IR (KBr)  $\tilde{\nu}$  3427, 2252, 2125, 1648, 1500  $\text{cm}^{-1}$ .  $^1\text{H}$  NMR (500 MHz, DMSO- $d_6$ )  $\delta$  9.21 (s, 2H, OH), 7.14 (d, 2H,  $J = 8.5$  Hz), 7.08 (d, 2H,  $J = 8.5$  Hz), 6.85 (d, 4H,  $J = 8.2$  Hz), 6.66 (d, 4H,  $J = 8.0$  Hz), 5.35 (s, 1H,  $\text{Ar}_3\text{CH}$ ) ppm.  $^{13}\text{C}$  NMR (126 MHz, DMSO- $d_6$ )  $\delta$  155.81, 153.96-153.98 (m), 142.22-142.28 (m), 134.66, 130.68, 130.03, 116.43, 115.37, 54.30 ppm.  $^{19}\text{F}$  NMR (470 MHz, DMSO- $d_6$ )  $\delta$  -90.59 (m, 2F, F2,6-Py), -155.01 (m, 2F, F3,5-Py) ppm.

**4-(4-(bis(5-bromothiophen-2-yl)methyl)phenoxy)-2,3,5,6-tetrafluoropyridine 9k**

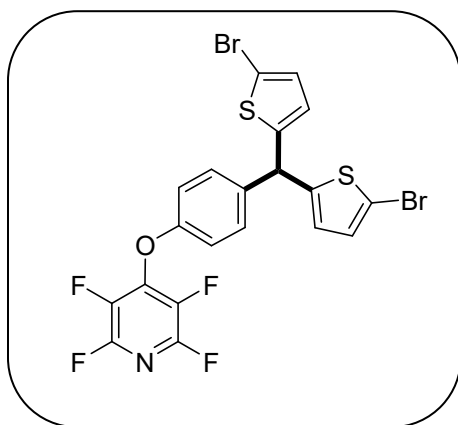

Black solid. Yield 92%. MP 102  $^{\circ}\text{C}$ . IR (KBr)  $\tilde{\nu}$  2924, 1641, 1601, 1500, 1481, 1438, 1204  $\text{cm}^{-1}$ .  $^1\text{H}$  NMR (500 MHz,  $\text{CDCl}_3$ )  $\delta$  7.29 (d, 2H,  $J = 8.9$  Hz), 7.04 (d, 2H,  $J = 8.7$  Hz), 6.91 (d, 2H,  $J = 3.8$  Hz), 6.58 (d, 2H,  $J = 3.8$  Hz), 5.68 (s, 1H,  $\text{Ar}_3\text{CH}$ ) ppm.  $^{13}\text{C}$  NMR (125 MHz,  $\text{CDCl}_3$ )  $\delta$  155.05, 147.58, 144.99-145.28 (m), 144.14-144.29 (m), 143.07-143.25 (m), 139.02, 137.26-137.39 (m), 137.04-137.15 (m), 129.90, 129.56, 126.67, 116.91, 111.91, 47.11 ppm.  $^{19}\text{F}$  NMR (470 MHz,  $\text{CDCl}_3$ )  $\delta$  -88.40--88.26 (m, 2F, F2,6-Py), -154.12--153.99 (m, 2F, F3,5-Py) ppm.

**4-(3-(bis(5-bromothiophen-2-yl)methyl)phenoxy)-2,3,5,6-tetrafluoropyridine 9l**

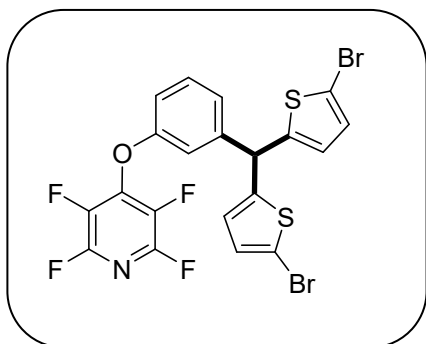

Black oil. Yield 93%. IR (KBr)  $\tilde{\nu}$  2252, 2125, 1644, 1501, 1485  $\text{cm}^{-1}$ .  $^1\text{H}$  NMR (500 MHz, DMSO- $d_6$ )  $\delta$  7.42 (t, 1H,  $J = 7.7$  Hz), 7.26 (bs, 1H), 7.18-7.22 (m, 2H), 7.07 (d, 2H,  $J = 2.2$  Hz), 6.71 (d, 2H,  $J = 3.3$  Hz), 6.04 (s, 1H,  $\text{Ar}_3\text{CH}$ ) ppm.  $^{13}\text{C}$  NMR (126 MHz, DMSO- $d_6$ )  $\delta$  156.04, 148.00, 145.01, 143.70-143.97 (m), 142.92-143.13 (m), 137.33-137.70 (m), 135.34-135.64 (m), 131.03, 130.59, 127.62, 125.11, 116.90, 115.94, 111.14, 46.48, 40.39, 40.22 ppm.  $^{19}\text{F}$  NMR (470 MHz, DMSO- $d_6$ )  $\delta$  -85.93--85.80 (m, 2F, F2,6-py), -150.09--149.96 (m, 2F, F3,5-py) ppm.

**3,3'-((4-((perfluoropyridin-4-yl)oxy)phenyl)methylene)bis(1H-indole) 9m**

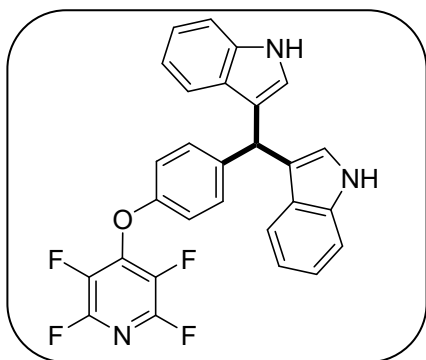

Yellow oil. Yield 89%. IR (KBr)  $\tilde{\nu}$  3413, 3056, 2925, 1641, 1601, 1499, 1479  $\text{cm}^{-1}$ .  $^1\text{H}$  NMR (500 MHz,  $\text{CDCl}_3$ )  $\delta$  7.93 (s, 2H), 7.32-7.41 (m, 6H), 7.20 (t, 2H,  $J = 7.4$  Hz), 7.04 (t, 2H,  $J = 7.7$  Hz), 6.98 (d, 2H,  $J = 8.5$  Hz), 6.64 (d, 2H,  $J = 1.4$  Hz), 5.91 (s, 1H,  $\text{Ar}_3\text{CH}$ ) ppm.  $^{13}\text{C}$  NMR (126 MHz,  $\text{CDCl}_3$ )  $\delta$  154.17-154.21 (m), 141.18-141.25 (m), 136.61-136.79 (m), 131.95, 130.18, 129.48-129.53 (m), 126.88-126.94 (m), 123.55, 122.10, 119.80, 119.38, 119.32, 116.60, 111.10, 39.50 ppm.  $^{19}\text{F}$  NMR (470 MHz,  $\text{CDCl}_3$ )  $\delta$  -89.00--88.87 (m, 2F, F2,6-py), -154.59--154.46 (m, 2F, F3,5-py) ppm.

**3,3'-((3-((perfluoropyridin-4-yl)oxy)phenyl)methylene)bis(1H-indole) 9n**

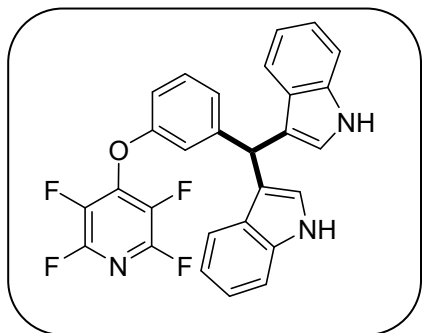

Yellow oil. Yield 92%. IR (KBr)  $\tilde{\nu}$  3427, 2251, 2125, 1645, 1583, 1501, 1485  $\text{cm}^{-1}$ .  $^1\text{H}$  NMR (500 MHz, DMSO- $d_6$ )  $\delta$  10.84(s, 2H), 7.21-7.37(m, 7H), 7.09 (dd, 1H,  $J_1 = 8.2$ ,  $J_2 = 2.9$  Hz), 7.00-7.07(m, 2H), 6.81-6.90 (m, 4H), 5.87(s, 1H,  $\text{Ar}_3\text{CH}$ ) ppm.  $^{13}\text{C}$  NMR (126 MHz, DMSO- $d_6$ )  $\delta$  155.94, 148.27, 137.03, 135.55-135.61 (m), 129.98-130.14 (m), 126.98, 125.60, 124.01, 121.40, 119.41, 118.66, 117.90, 117.04, 114.39, 111.93 ppm.  $^{19}\text{F}$  NMR (470 MHz, DMSO- $d_6$ ):  $\delta$  -90.90 (m, 2F, F2,6-py), -155.22 (m, 2F, F3,5-py) ppm.

**4-(3-(14H-dibenzo[a,j]xanthen-14-yl)phenoxy)-2,3,5,6-tetrafluoropyridine 9o**

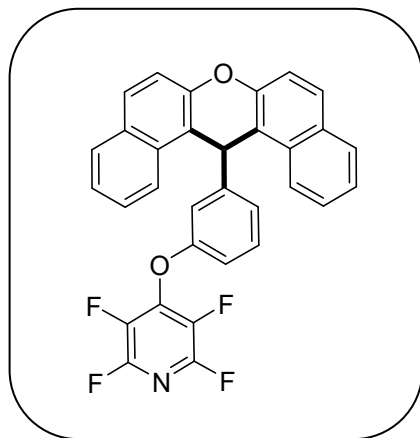

Yellow oil. Yield 84%. IR (KBr)  $\tilde{\nu}$  2252, 2125, 1656, 1026  $\text{cm}^{-1}$ .  $^1\text{H}$  NMR (500 MHz, DMSO- $d_6$ )  $\delta$  8.60 (d, 2H,  $J = 8.6$  Hz), 7.91 (d, 4H,  $J = 8.5$  Hz), 7.52-7.60 (m, 5H), 7.46 (t, 2H,  $J = 7.5$  Hz), 7.08-7.11 (m, 2H), 6.86-6.90 (m, 1H), 6.66 (s, 1H,  $\text{Ar}_3\text{CH}$ ) ppm.  $^{13}\text{C}$  NMR (126 MHz, DMSO- $d_6$ )  $\delta$  155.64, 148.46, 148.31, 144.87-145.15 (m), 143.70-143.90 (m), 142.96-143.21 (m), 137.67-137.94 (m), 135.60-135.89

(m), 131.28, 131.10, 130.90, 129.69, 129.06, 127.27, 125.05, 124.75, 123.67, 118.07, 117.22, 116.08, 114.52, 36.78 ppm.  $^{19}\text{F}$  NMR (470 MHz, DMSO- $d_6$ )  $\delta$  – 90.62 (m, 2F, F2,6-py), – 154.48 (m, 2F, F3,5-py) ppm.

***4-(4-(14H-dibenzo[a,j]xanthen-14-yl)phenoxy)-2,3,5,6-tetrafluoropyridine 9p***

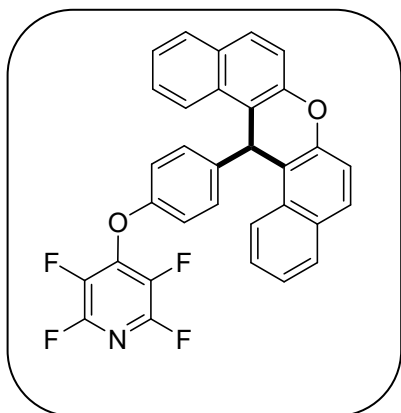

White oil. Yield 90%. IR (KBr)  $\tilde{\nu}$  1640, 1498, 1218, 1169  $\text{cm}^{-1}$ .  $^1\text{H}$  NMR (500 MHz,  $\text{CDCl}_3$ )  $\delta$  8.33 (d, 2H,  $J = 8.5$  Hz), 7.86 (d, 2H,  $J = 8.1$  Hz), 7.82 (d, 2H,  $J = 8.9$  Hz), 7.60 (t, 2H,  $J = 8.4$  Hz), 7.60 (dd, 4H,  $J_1 = 8.9$  Hz,  $J_2 = 3.0$  Hz), 7.44 (t, 2H,  $J = 7.4$  Hz), 6.81 (d, 2H,  $J = 8.8$  Hz), 6.52 (s, 1H,  $\text{Ar}_3\text{CH}$ ) ppm.  $^{13}\text{C}$  NMR (126 MHz,  $\text{CDCl}_3$ )  $\delta$  154.60-154.70 (m), 152.68, 138.03-138.08 (m), 133.60-133.66 (m), 130.04, 129.84, 129.79, 129.00, 127.40, 125.60-125.77 (m), 123.47, 122.36, 119.70, 118.35, 117.41, 41.87 ppm.  $^{19}\text{F}$  NMR (470 MHz,  $\text{CDCl}_3$ )  $\delta$  –88.74\_ –88.61 (m, 2F, F2,6-py), –153.96\_ –153.83 (m, 2F, F3,5-py).

**6. Spectral data of synthesized bis- and tris-TRAMs containing perfluoropyridine subunits 10 a-g**

***2,4-Bis(3-(bis(4-methoxyphenyl)methyl)phenoxy)-3,5,6-trifluoropyridine 10a***

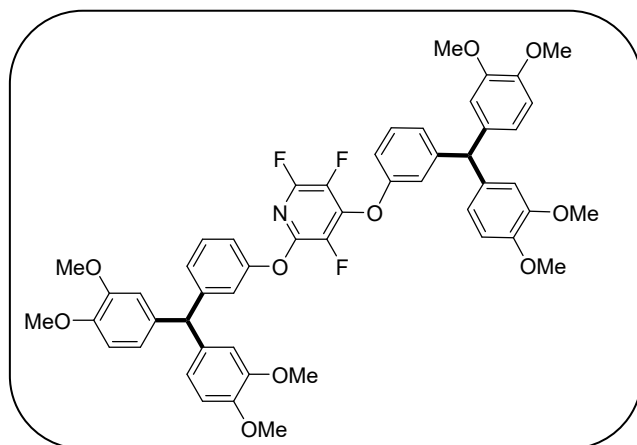

85%, White solid, mp 82-85 °C, IR (KBr):  $\nu_{\text{max}}$  3017, 2935, 2835, 1606, 1583, 1512  $\text{cm}^{-1}$ ;  $^1\text{H}$  NMR (500 MHz,  $\text{CDCl}_3$ )  $\delta$  7.27–7.34 (m, 2H), 6.95–7.03 (m, 3H), 6.88 (bs, 2H), 6.80 (d,  $J = 8.2$  Hz, 4H), 6.59–6.68 (m, 9H), 5.47(s, 1H,  $\text{Ar}_3\text{CH}$ ), 5.46(s, 1H,  $\text{Ar}_3\text{CH}$ ), 3.87 (s, 6H, OMe), 3.86 (s, 6H, OMe), 3.78 (s, 6H, OMe), 3.77 (s, 6H, OMe) ppm.  $^{13}\text{C}$  NMR (126 MHz,  $\text{CDCl}_3$ )  $\delta$  156.13, 152.63, 148.93, 147.68–147.78 (m), 146.94–146.96 (m), 146.53, 136.14, 136.02, 135.95, 134.60–134.76 (m), 133.44, 133.05, 129.55, 129.38, 126.54, 125.80, 121.93, 121.41, 118.66, 117.93, 114.22, 112.82, 111.08, 55.87, 55.83, 55.60 ppm.  $^{19}\text{F}$  NMR (470 MHz,  $\text{CDCl}_3$ )  $\delta$  -89.78 (dd,  $J_1 = 25.9$  Hz,  $J_2 = 22.8$  Hz, 1F), -153.25 (d,  $J = 26.3$  Hz, 1F), -159.47 (d,  $J = 22.3$  Hz, 1F) ppm.

**2,4-Bis(3-(bis(2-methoxy-5-methylphenyl)methyl)phenoxy)-3,5,6-trifluoropyridine 10b**

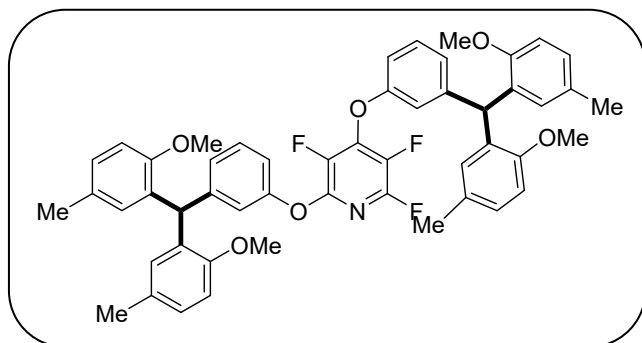

White oil. Yield 89%. IR (KBr)  $\tilde{\nu}$  3006, 2925, 2835, 1637, 1607, 1583  $\text{cm}^{-1}$ .  $^1\text{H}$  NMR (500 MHz,  $\text{CDCl}_3$ )  $\delta$  7.29 (t, 2H,  $J = 7.9$  Hz), 7.24 (t, 1H,  $J = 7.9$  Hz), 6.95–7.04 (m, 8H), 6.87–6.91 (m, 2H), 6.75–6.82 (m, 7H), 6.65 (d, 1H,  $J = 1.9$  Hz), 6.59 (d, 1H,  $J = 2.0$  Hz), 6.17 (s, 1H,  $\text{Ar}_3\text{CH}$ ), 6.13 (s, 1H,  $\text{Ar}_3\text{CH}$ ), 3.67–3.69 (m, 12H), 2.19–2.22 (m, 12H) ppm.  $^{13}\text{C}$  NMR (126 MHz,  $\text{CDCl}_3$ )  $\delta$  156.00, 155.26, 155.21, 152.46–152.65 (m), 147.68, 147.03, 146.59, 145.45–145.57(m), 145.36–145.42 (m), 144.69–144.90 (m), 143.21–143.62 (m), 131.83, 131.57, 130.74, 130.63, 129.30, 129.09, 128.93, 127.79, 127.71, 126.51, 125.74, 121.80, 117.89, 117.62, 113.84, 110.97, 110.87, 55.93, 55.83, 43.18, 20.72 ppm.  $^{19}\text{F}$  NMR (470

MHz, CDCl<sub>3</sub>)  $\delta$  -89.94 (dd,  $J_1 = 26.1$  Hz,  $J_2 = 22.7$  Hz, 1F), -153.32 (d,  $J = 28.0$  Hz, 1F), -159.81 (d,  $J = 22.4$  Hz, 1F) ppm.

**2,4-Bis(3-(bis(4-methoxyphenyl)methyl)phenoxy)-3,5,6-trifluoropyridine 10c**

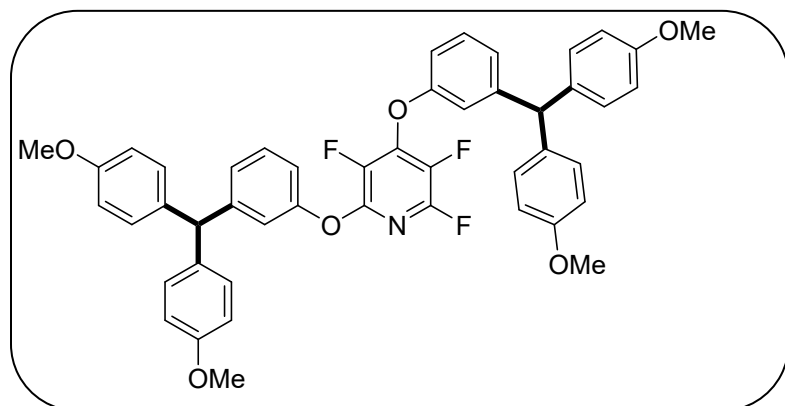

Yellow oil. Yield 81%. IR (KBr)  $\tilde{\nu}$  3005, 2954, 2932, 2836, 1637, 1609 cm<sup>-1</sup>. <sup>1</sup>H NMR (500 MHz, CDCl<sub>3</sub>)  $\delta$  7.32 (t, 1H,  $J = 7.9$  Hz), 7.25–7.29 (m, 1H), 7.01–7.09 (m, 12H), 6.83–6.88 (m, 10H), 5.49 (s, 1H, Ar<sub>3</sub>CH), 5.47 (s, 1H, Ar<sub>3</sub>CH), 3.78–3.81 (m, 12H) ppm. <sup>13</sup>C NMR (126 MHz, CDCl<sub>3</sub>)  $\delta$  158.21, 158.15, 156.12, 156.06, 152.74, 147.24, 145.42-145.59 (m), 144.66-144.70 (m), 144.45-144.57 (m), 143.50-143.61 (m), 143.13-143.27 (m), 135.88, 135.68, 130.28, 130.22, 129.52, 129.32, 126.38, 125.69, 121.84, 120.36, 118.37, 117.79, 113.99, 113.80, 113.78, 55.21, 54.95, 54.91 ppm. <sup>19</sup>F NMR (470 MHz, CDCl<sub>3</sub>)  $\delta$  -89.59 (dd, 1F,  $J_1 = 26.1$  Hz,  $J_2 = 22.6$  Hz), -152.85 (d, 1F,  $J = 22.3$  Hz), -159.13 (d,  $J = 26.3$  Hz, 1F) ppm.

**2,4-Bis(3-(bis(5-bromothiophen-2-yl)methyl)phenoxy)-3,5,6-trifluoropyridine 10d**

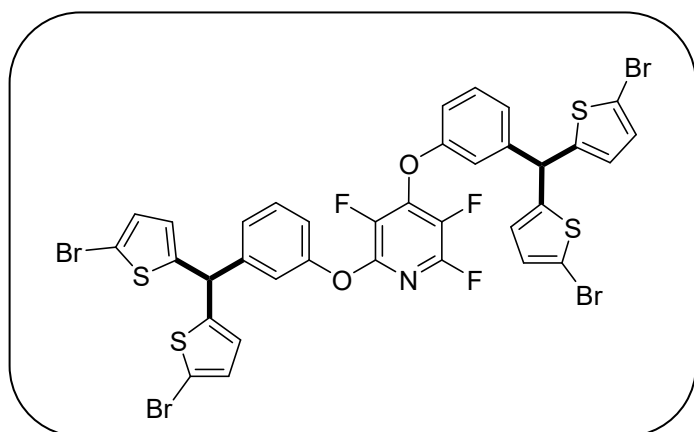

Black oil. Yield 91%. IR (KBr)  $\tilde{\nu}$  2924, 1637, 1605, 1584, 1462, 1442  $\text{cm}^{-1}$ .  $^1\text{H}$  NMR (500 MHz,  $\text{CDCl}_3$ )  $\delta$  7.31-7.43 (m, 2H), 7.17 (d, 1H,  $J = 7.6$  Hz), 7.08-7.14 (m, 3H), 7.04 (bs, 2H), 6.98 (dd, 2H,  $J_1 = 8.2$ ,  $J_2 = 2.0$  Hz), 6.91 (d, 2H,  $J = 3.7$  Hz), 6.61 (dd, 4H,  $J_1 = 14.4$ ,  $J_2 = 3.6$  Hz), 5.69 (s, 1H,  $\text{Ar}_3\text{CH}$ ), 5.68 (s, 1H,  $\text{Ar}_3\text{CH}$ ) ppm.  $^{13}\text{C}$  NMR (126 MHz,  $\text{CDCl}_3$ )  $\delta$  156.25, 152.85, 147.43, 147.19, 144.32, 143.81, 143.56, 142.91-143.20 (m), 138.85-138.90 (m), 136.78-136.82 (m), 135.11-135.37 (m), 133.27, 130.23, 129.96, 129.57, 129.55, 126.79, 125.34, 124.63, 120.92, 119.97, 116.85, 115.51, 111.99, 111.89, 47.56 ppm.  $^{19}\text{F}$  NMR (470 MHz,  $\text{CDCl}_3$ )  $\delta$  -89.00 (dd,  $J_1 = 26.1$  Hz,  $J_2 = 22.5$  Hz, 1F), -152.36 (d,  $J = 26.5$  Hz, 1F), -158.55 (d,  $J = 22.1$  Hz, 1F) ppm.

**3,3',3'',3'''-((((3,5,6-Trifluoropyridine-2,4-diyl)bis(oxy))bis(3,1-phenylene))bis(methanetriyl))tetrakis(1H-indole) 10e**

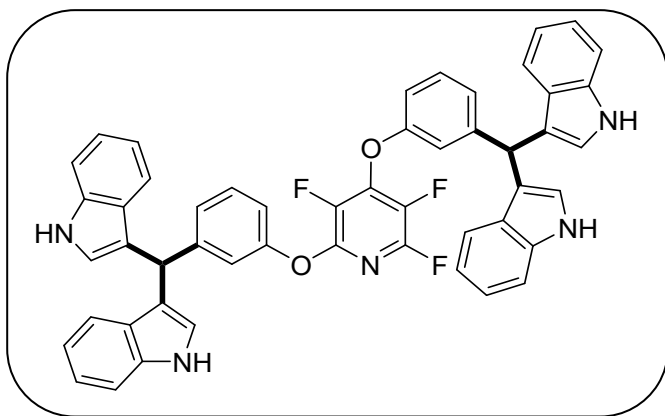

Yellow solid, Yield 90%. MP 180-181  $^{\circ}\text{C}$ . IR (KBr)  $\tilde{\nu}$  3410, 3053, 1607, 1582, 1458, 1415  $\text{cm}^{-1}$ .  $^1\text{H}$  NMR (500 MHz,  $\text{CDCl}_3$ )  $\delta$  7.80-7.88 (m, 3H), 7.40 (d, 2H,  $J = 7.9$  Hz), 7.27-7.36 (m, 8H), 7.23-7.26 (m, 2H), 7.14-7.18 (m, 5H), 7.05 (t, 1H,  $J = 2.0$  Hz), 6.98-7.03 (m, 6H), 6.91 (dd, 1H,  $J_1 = 8.0$  Hz,  $J_2 = 2.6$  Hz), 6.67 (d, 2H,  $J = 2.3$  Hz), 6.56 (d, 2H,  $J = 2.3$  Hz), 5.89 (s, 1H,  $\text{Ar}_3\text{CH}$ ), 5.87 (s, 1H,  $\text{Ar}_3\text{CH}$ ) ppm.  $^{13}\text{C}$  NMR (126 MHz,  $\text{CDCl}_3$ )  $\delta$  156.16, 152.92-152.96 (m), 152.58-152.59 (m), 147.36-147.39 (m), 146.52-146.62 (m), 146.13-146.19 (m), 136.65-136.66 (m), 129.55, 129.39, 126.95, 126.87, 125.77, 125.15, 123.72, 123.57, 122.02, 121.99, 121.91, 121.08, 121.03, 119.81, 119.73, 119.32, 119.08, 118.90, 118.35, 116.84, 114.70, 114.52, 114.46, 114.44, 111.06, 40.06, 39.99 ppm.  $^{19}\text{F}$  NMR (470 MHz,  $\text{CDCl}_3$ )  $\delta$  -89.75 (dd,  $J_1 = 26.2$  Hz,  $J_2 = 22.6$  Hz, 1F), -152.40 (d,  $J = 26.3$  Hz, 1F), -159.49 (d,  $J = 22.5$  Hz, 1F) ppm.

**2,4,6-Tris(3-(bis(3,4-dimethoxyphenyl)methyl)phenoxy)-3,5-difluoropyridine 10f**



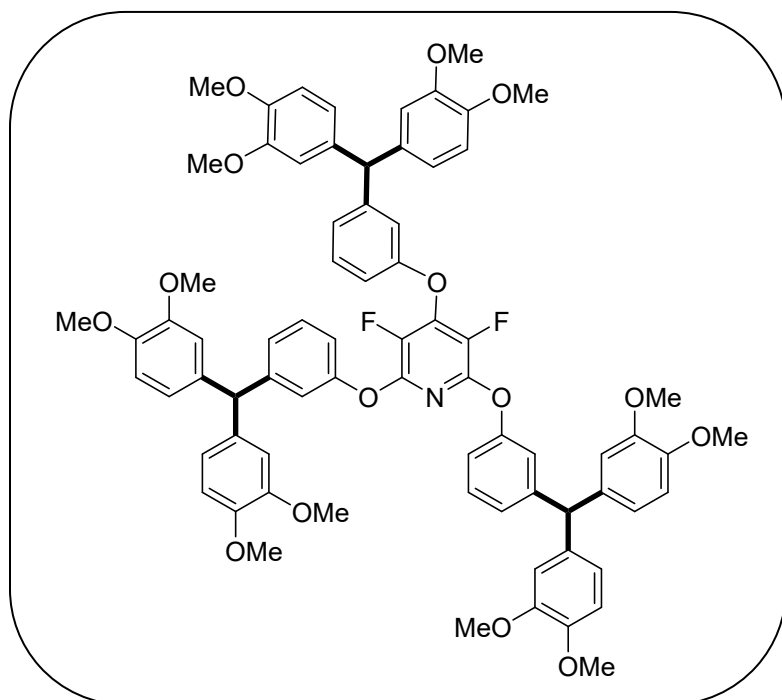

White oil. Yield 53%. IR (KBr)  $\tilde{\nu}$  2930, 1582, 1512, 1440  $\text{cm}^{-1}$ .  $^1\text{H}$  NMR (500 MHz,  $\text{CDCl}_3$ )  $\delta$  7.13 (t, 2H,  $J = 7.9$  Hz), 6.77-6.93 (m, 10H), 6.78 (d, 2H,  $J = 8.3$  Hz), 6.73 (d, 4H,  $J = 8.4$  Hz), 6.64 (d, 2H,  $J = 2.0$  Hz), 6.59-6.61 (m, 6H), 6.53 (dd, 4H,  $J_1 = 8.3$  Hz,  $J_2 = 2.0$  Hz) 5.44 (s, 1H,  $\text{Ar}_3\text{CH}$ ), 5.36 (s, 2H,  $\text{Ar}_3\text{CH}$ ), 3.84 (s, 6H, OMe), 3.83 (s, 12H, OMe), 3.75 (s, 6H, OMe), 3.71 (s, 12H, OMe) ppm.  $^{19}\text{F}$  NMR (470 MHz,  $\text{CDCl}_3$ )  $\delta$  -155.27 (s, 2F, F3,5-py) ppm.

***2,6-Bis(3-(bis(3,4-dimethoxyphenyl)methyl)phenoxy)-4-(4-(bis(3,4-dimethoxyphenyl)methyl)phenoxy)-3,5-difluoropyridine 10g***

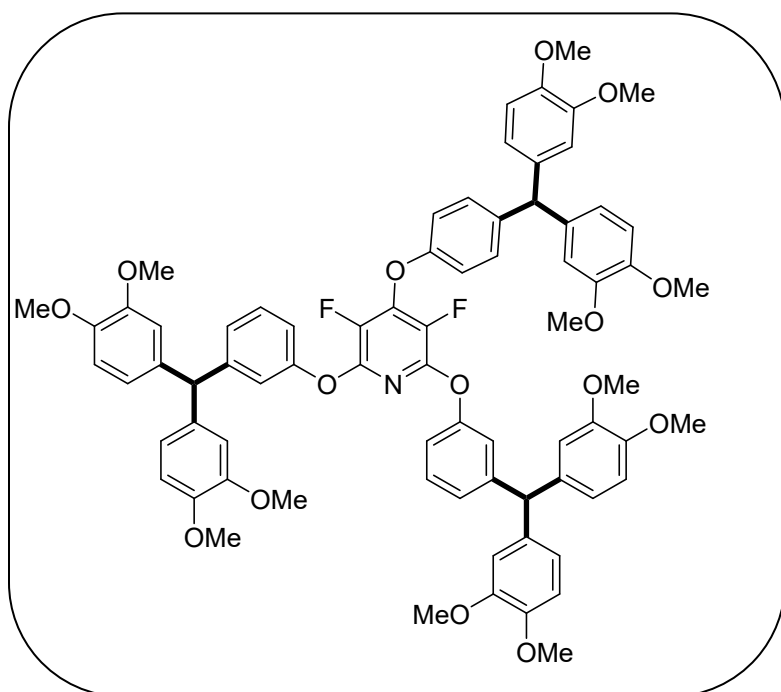

Yellow oil. Yield 48%. IR (KBr)  $\tilde{\nu}$  3016, 2932, 2835, 1588, 1512  $\text{cm}^{-1}$ .  $^1\text{H}$  NMR (500 MHz,  $\text{CDCl}_3$ )  $\delta$  7.14 (t, 2H,  $J = 7.9$  Hz), 7.08 (d, 2H,  $J = 8.7$  Hz), 6.97 (d, 2H,  $J = 8.7$  Hz), 6.87-6.89 (m, 4H), 6.83 (d, 2H,  $J = 1.8$  Hz), 6.79 (d, 2H,  $J = 8.3$  Hz), 6.73 (d, 4H,  $J = 8.3$ ), 6.64 (d, 2H,  $J = 1.9$  Hz), 6.61 (d, 4H,  $J = 1.9$  Hz), 6.59 (dd, 2H,  $J_1 = 7.4$  Hz,  $J_2 = 2.1$  Hz), 6.54 (dd, 4H,  $J_1 = 8.2$ ,  $J_2 = 2.0$  Hz), 5.42 (s, 1H,  $\text{Ar}_3\text{CH}$ ), 5.36 (s, 2H,  $\text{Ar}_3\text{CH}$ ), 3.86 (s, 6H, OMe), 3.83 (s, 12H, OMe), 3.76 (s, 6H, OMe), 3.71 (s, 12H, OMe) ppm.  $^{13}\text{C}$  NMR (126 MHz,  $\text{CDCl}_3$ )  $\delta$  154.85, 153.68-153.81 (m), 148.88, 147.65, 146.24, 145.37-145.58 (m), 136.51-136.54 (m), 136.17-136.23 (m), 130.54, 128.87, 125.50, 121.40, 120.84, 117.72, 116.11, 112.77-112.85 (m), 110.95-111.07 (m), 55.83, 55.62 ppm.  $^{19}\text{F}$  NMR (470 MHz,  $\text{CDCl}_3$ )  $\delta$  -155.23 (s, 2F, F3,5-py) ppm.

***(R)-4-(3-((3,4-dimethoxyphenyl)(2-methoxy-5-methylphenyl)methyl)phenoxy)-2,3,5,6-tetrafluoropyridine 11a***

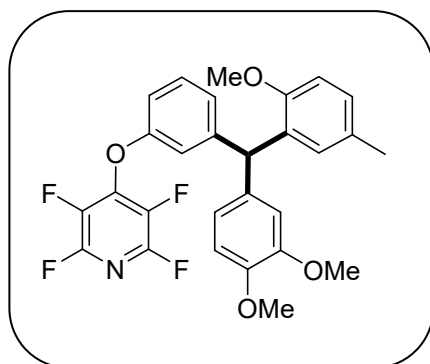

Yellow oil. Yield 29%. IR (KBr)  $\tilde{\nu}$  2928, 2837, 2254, 1641, 1608, 1500  $\text{cm}^{-1}$ .  $^1\text{H}$  NMR (500 MHz,  $\text{CDCl}_3$ )  $\delta$  7.26-7.29 (m, 1H), 7.02 (dd, 1H,  $J_1 = 8.2$  Hz,  $J_2 = 1.8$  Hz), 6.97 (d, 1H,  $J = 7.7$  Hz), 6.89 (dd, 1H,  $J_1 = 8.2$  Hz,  $J_2 = 2.4$  Hz), 6.76-6.80 (m, 3H), 6.64 (d, 1H,  $J = 1.9$  Hz), 6.62 (d, 1H,  $J = 1.7$  Hz), 6.56 (dd, 1H,  $J_1 = 8.3$  Hz,  $J_2 = 1.9$  Hz), 5.81 (s, 1H,  $\text{Ar}_3\text{CH}$ ), 3.86 (s, 3H, OMe), 3.77 (s, 3H, OMe), 3.68 (s, 3H, OMe), 2.20 (s, 3H, Me) ppm.  $^{13}\text{C}$  NMR (126 MHz,  $\text{CDCl}_3$ )  $\delta$  155.66, 154.97, 148.81, 147.54, 147.21, 144.94-145.28 (m), 144.60-144.75 (m), 142.95-143.33 (m), 136.73-137.05 (m), 135.55, 134.67-134.96 (m), 131.67, 130.60, 129.53, 129.43, 128.12, 126.31, 121.44, 117.83, 114.33, 112.98, 110.93, 110.88, 110.74, 55.81, 55.77, 55.64, 49.09, 20.61 ppm.  $^{19}\text{F}$  NMR (470 MHz,  $\text{CDCl}_3$ )  $\delta$  -89.14--89.00 (m, 2F, F2,6-py), -154.71--154.58 (m, 2F, F3,5-py) ppm.

**(R)-4-(3-((5-bromothiophen-2-yl)(3,4-dimethoxyphenyl)methyl)phenoxy)-2,3,5,6-tetrafluoropyridine**  
**11b**

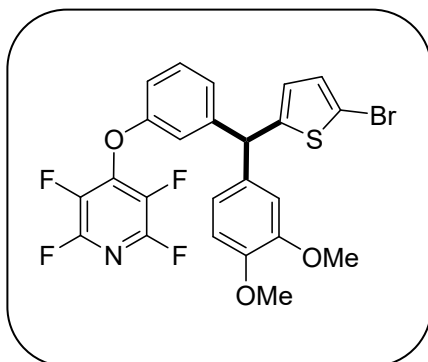

Yellow oil. Yield 33%. IR (KBr)  $\tilde{\nu}$  2931, 2837, 1642, 1608, 1586, 1502  $\text{cm}^{-1}$ .  $^1\text{H}$  NMR (500 MHz,  $\text{CDCl}_3$ )  $\delta$  7.32 (t, 1H,  $J = 7.9$  Hz), 7.07 (d, 1H,  $J = 7.3$  Hz), 6.89-6.94 (m, 4H), 6.82 (d, 1H,  $J = 7.9$  Hz), 6.69-6.71 (m, 1H), 6.45 (d, 1H,  $J = 3.7$  Hz), 5.54 (s, 1H,  $\text{Ar}_3\text{CH}$ ), 3.87 (s, 3H, OMe), 3.80 (s, 3H, OMe) ppm.  $^{13}\text{C}$  NMR (126 MHz,  $\text{CDCl}_3$ )  $\delta$  155.82, 149.16, 148.78, 148.38, 145.82, 145.02-145.24 (m), 144.24-144.53 (m), 143.09-143.31 (m), 136.82-137.13 (m), 134.64, 129.96, 129.47, 126.76, 125.64, 120.88, 120.84, 117.41, 115.07, 112.15, 111.24, 55.88, 55.81, 51.56 ppm.  $^{19}\text{F}$  NMR (470 MHz,  $\text{CDCl}_3$ )  $\delta$  -88.69--88.56 (m, 2F, F2,6-py), -154.40--154.26 (m, 2F, F3,5-py) ppm.

**7. NMR spectra of 4-((perfluoropyridinyl)oxy)benzaldehyde derivatives 3a-c**

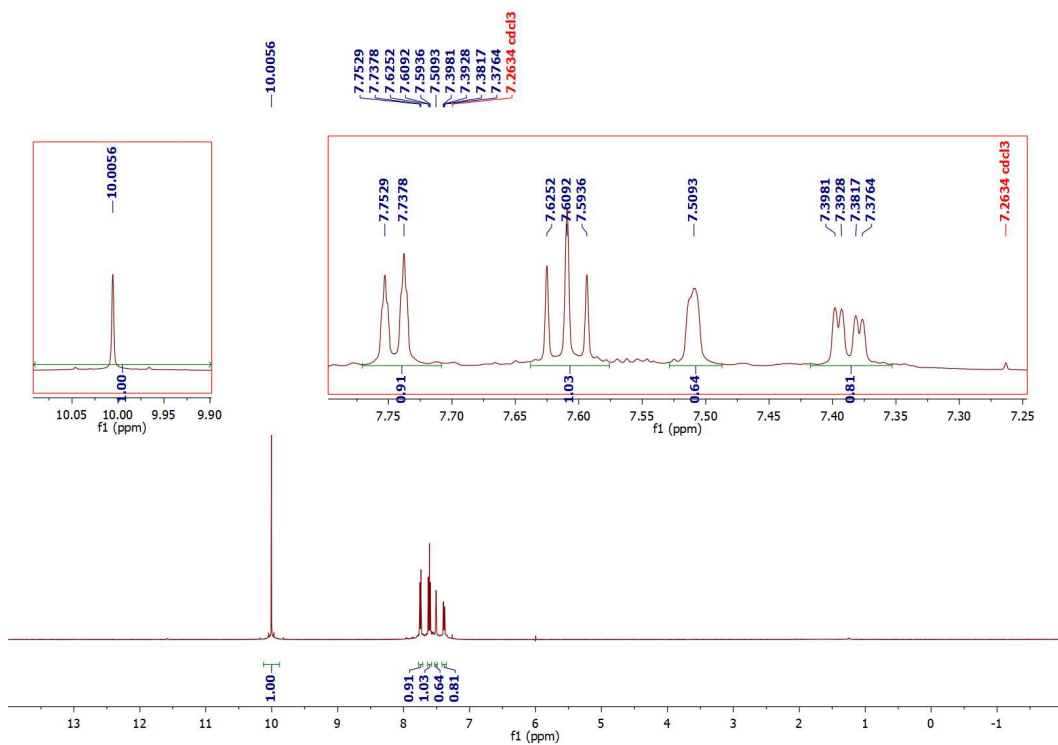

<sup>1</sup>H NMR spectrum of 3-((perfluoropyridin-4-yl)oxy)benzaldehyde **3a**

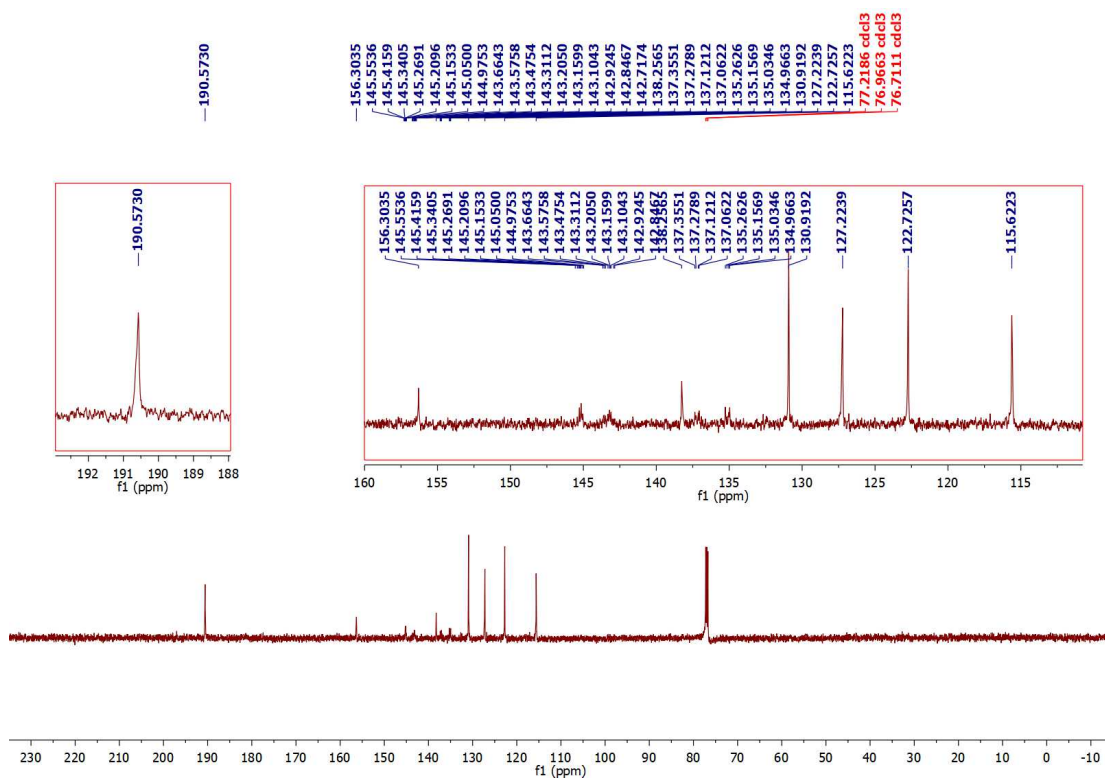

<sup>13</sup>C NMR spectrum of 3-((perfluoropyridin-4-yl)oxy)benzaldehyde **3a**

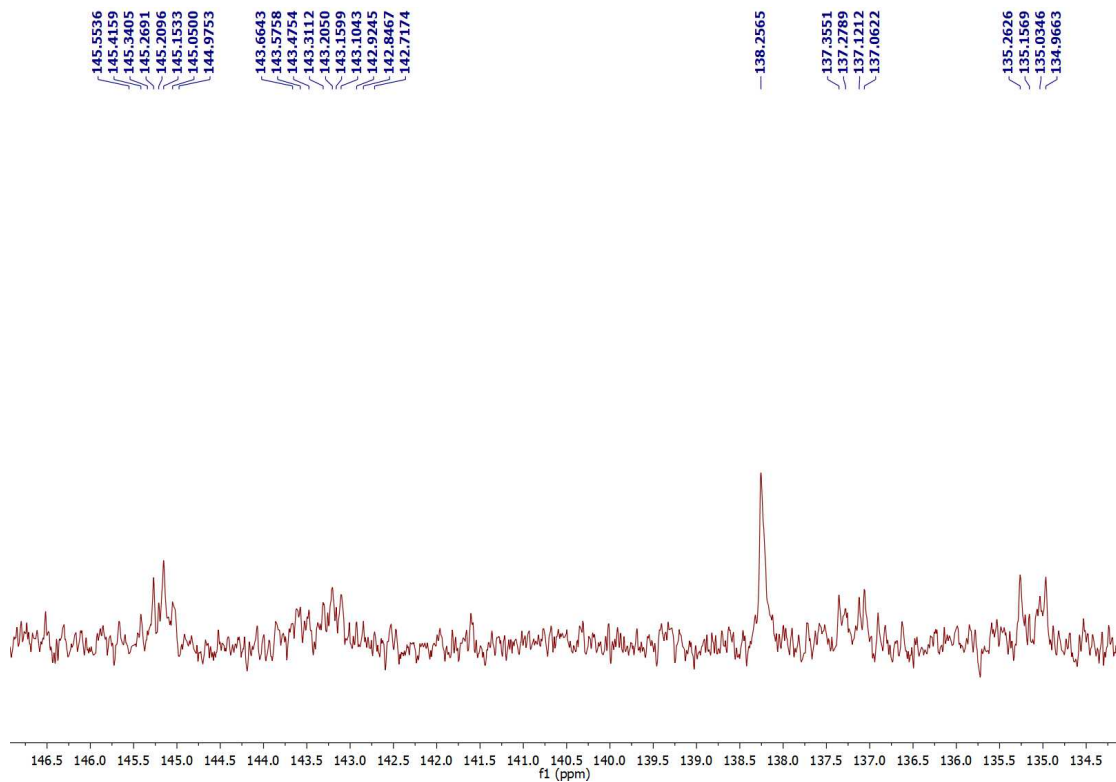

Expanded  $^{13}\text{C}$  NMR spectrum of 3-((perfluoropyridin-4-yl)oxy)benzaldehyde **3a**

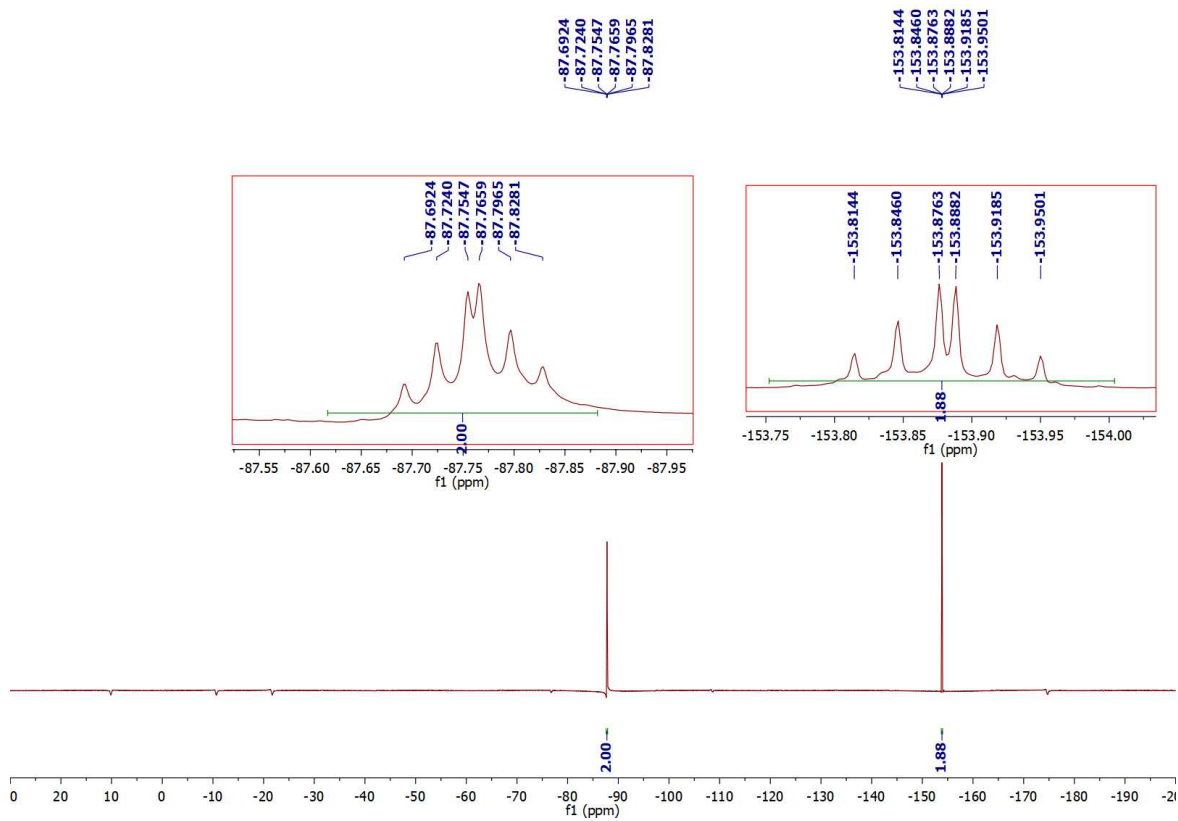

$^{19}\text{F}$  NMR spectrum of 3-((perfluoropyridin-4-yl)oxy)benzaldehyde **3a**

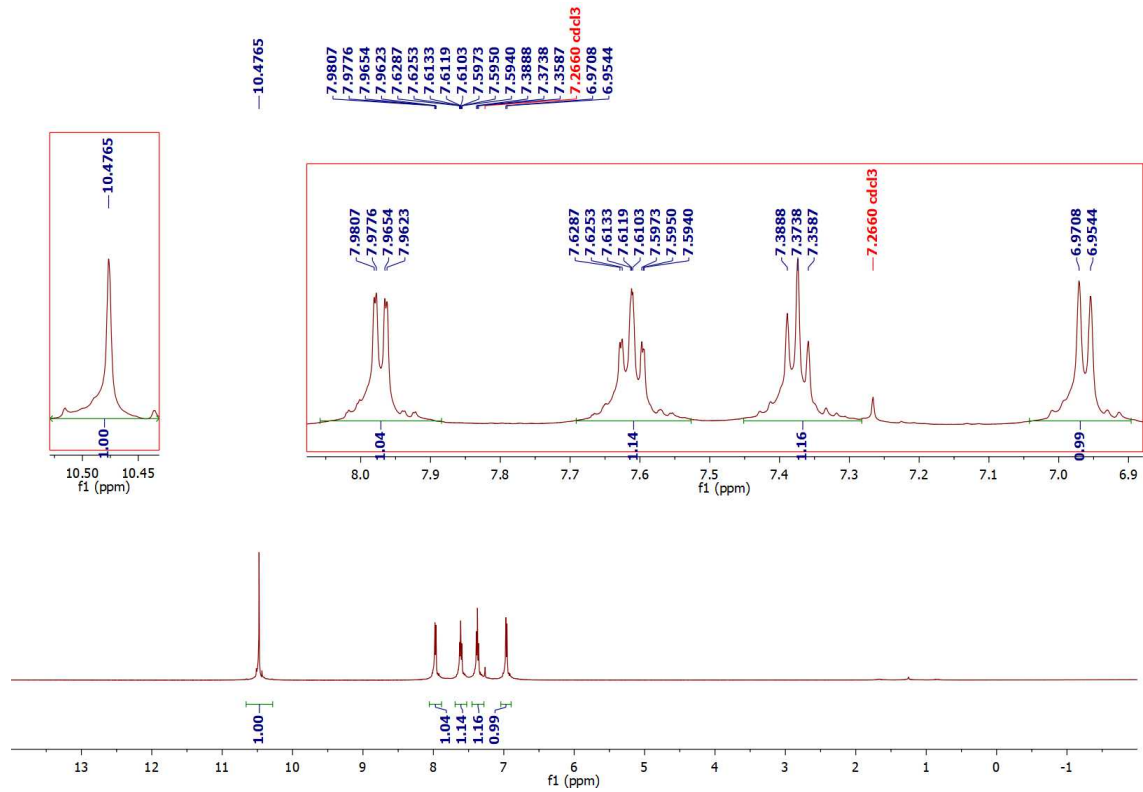

<sup>1</sup>H NMR spectrum of 2-((perfluoropyridin-4-yl)oxy)benzaldehyde **3b**

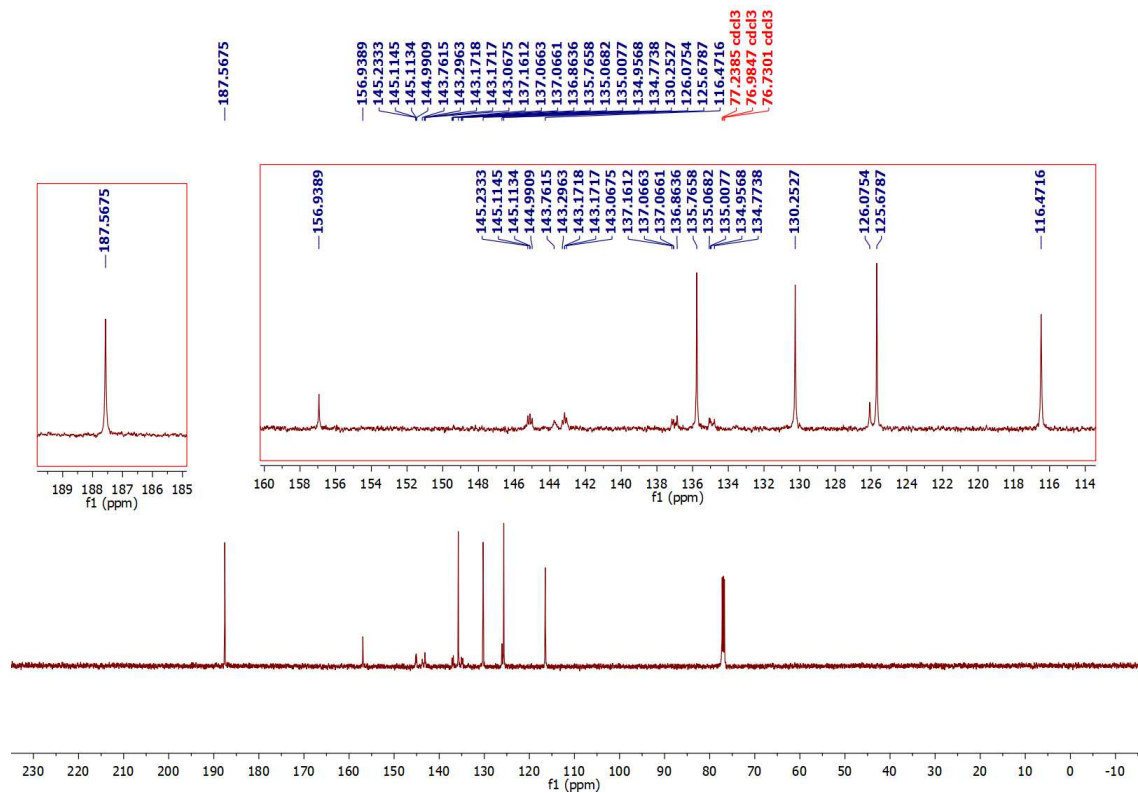

<sup>13</sup>C NMR spectrum of 2-((perfluoropyridin-4-yl)oxy)benzaldehyde **3b**

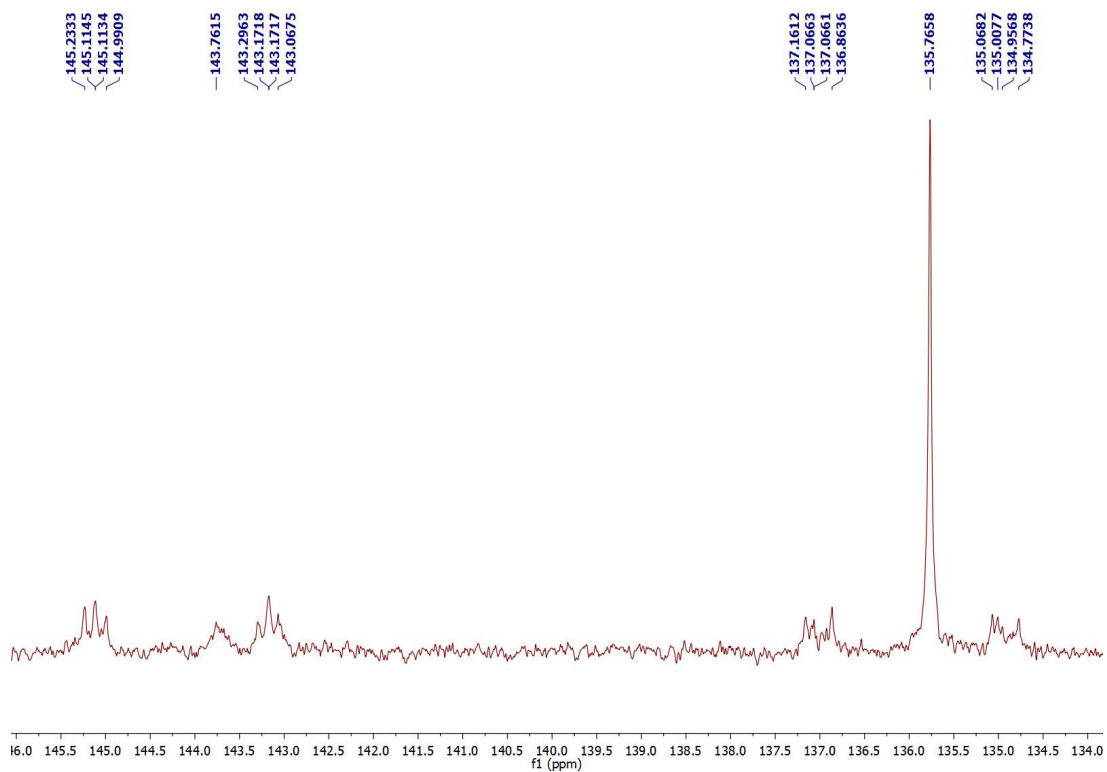

Expanded  $^{13}\text{C}$  NMR spectrum of 2-((perfluoropyridin-4-yl)oxy)benzaldehyde **3b**

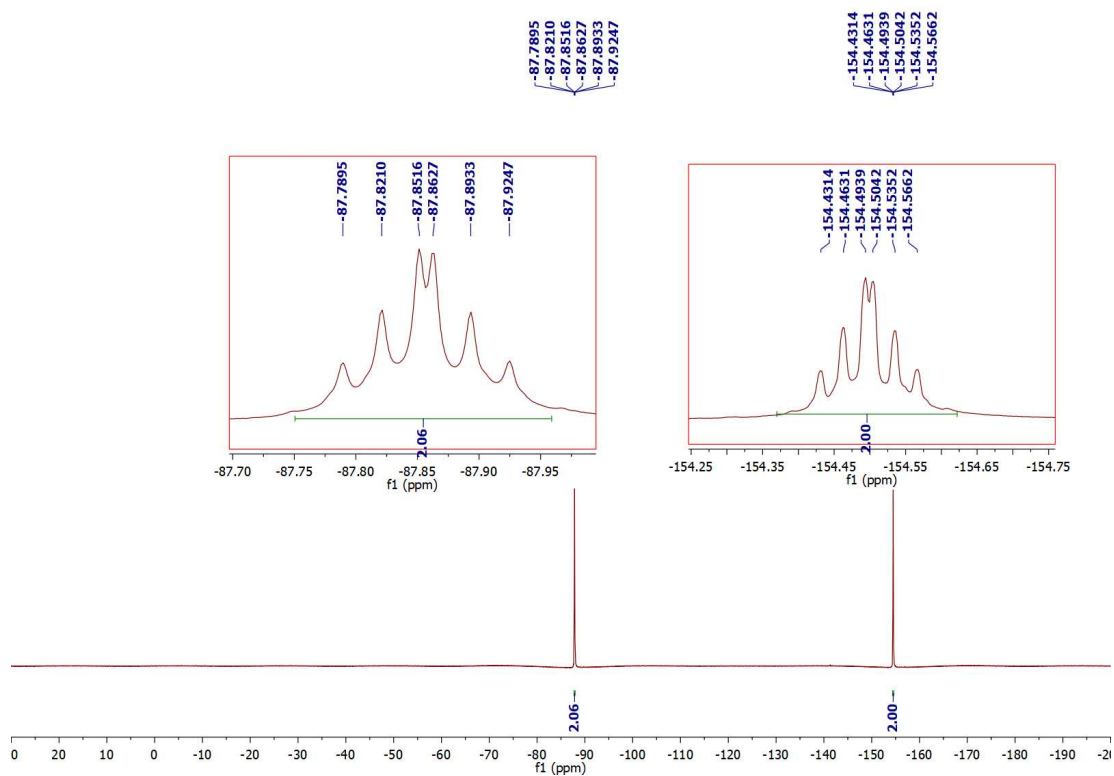

$^{19}\text{F}$  NMR spectrum of 2-((perfluoropyridin-4-yl)oxy)benzaldehyde **3b**

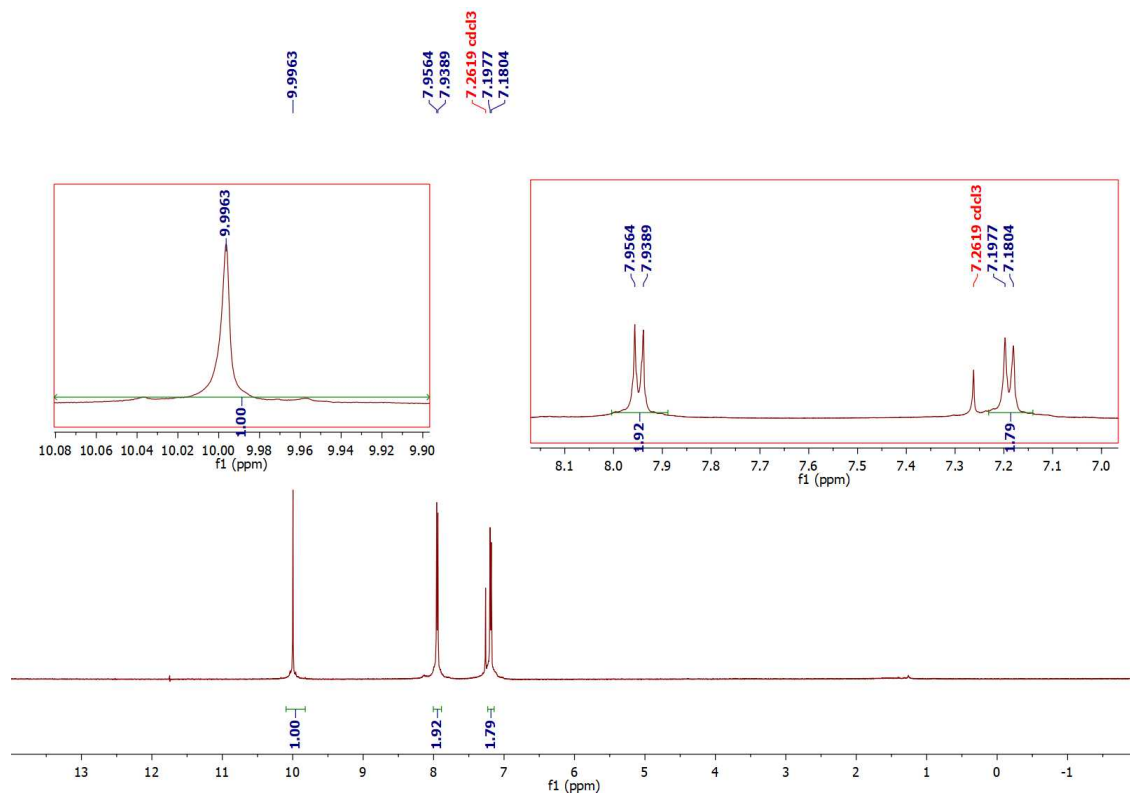

<sup>1</sup>H NMR spectrum of 4-((perfluoropyridin-4-yl)oxy)benzaldehyde **3c**

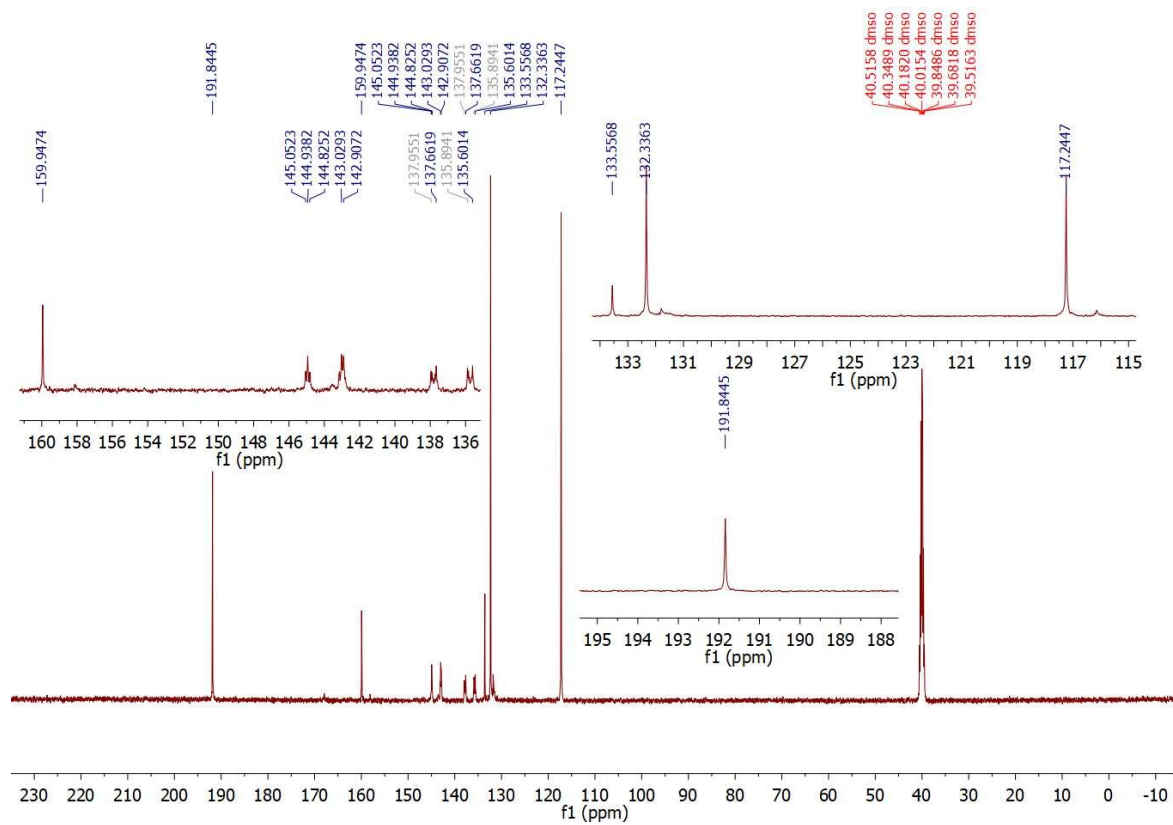

<sup>13</sup>C NMR spectrum of 4-((perfluoropyridin-4-yl)oxy)benzaldehyde **3c**



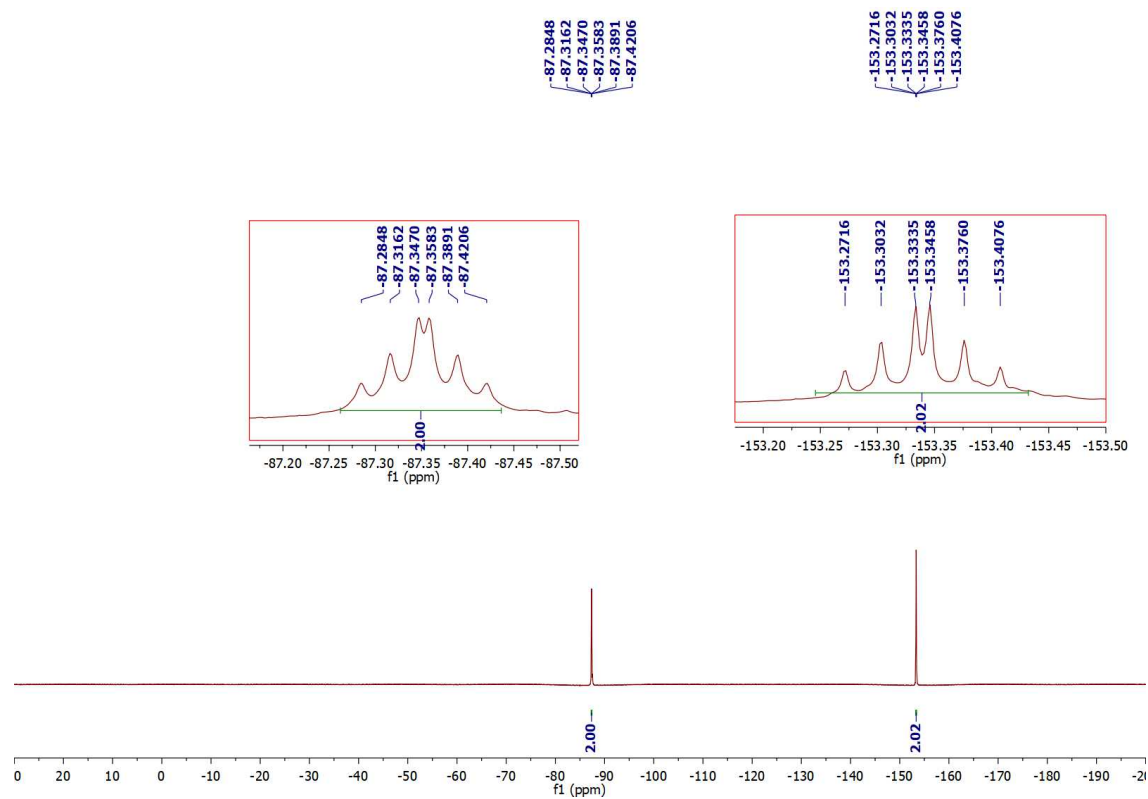

$^{19}\text{F}$  NMR spectrum of 4-((perfluoropyridin-4-yl)oxy)benzaldehyde **3c**

8. NMR spectra of 3,3'-((3,5,6-trifluoropyridine-2,4-diyl)bis(oxy))dibenzaldehyde **4a**

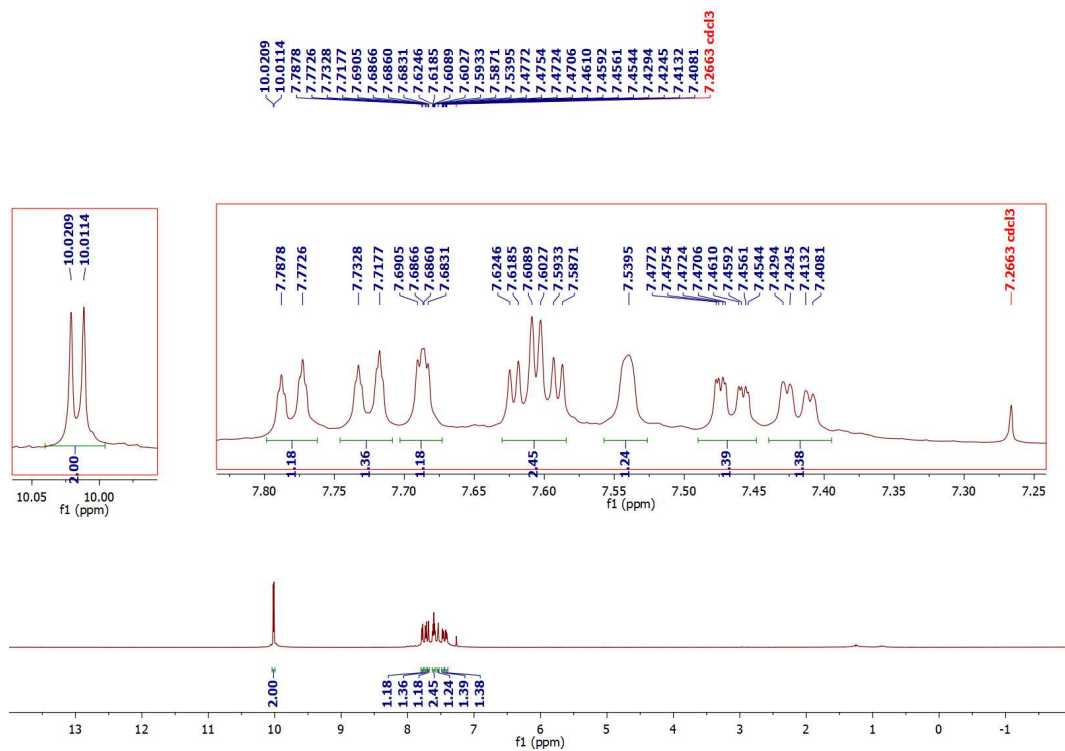

<sup>1</sup>H NMR spectrum of 3,3'-((3,5,6-trifluoropyridine-2,4-diyl)bis(oxy))dibenzaldehyde **4a**

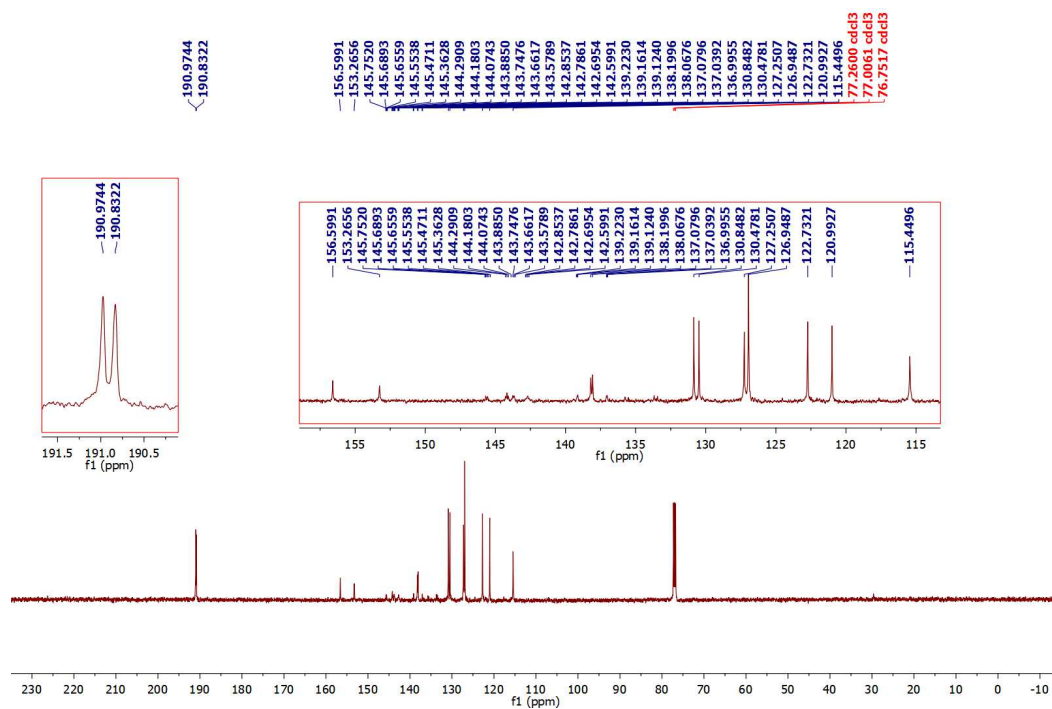

<sup>13</sup>C NMR spectrum of 3,3'-((3,5,6-trifluoropyridine-2,4-diyl)bis(oxy))dibenzaldehyde **4a**

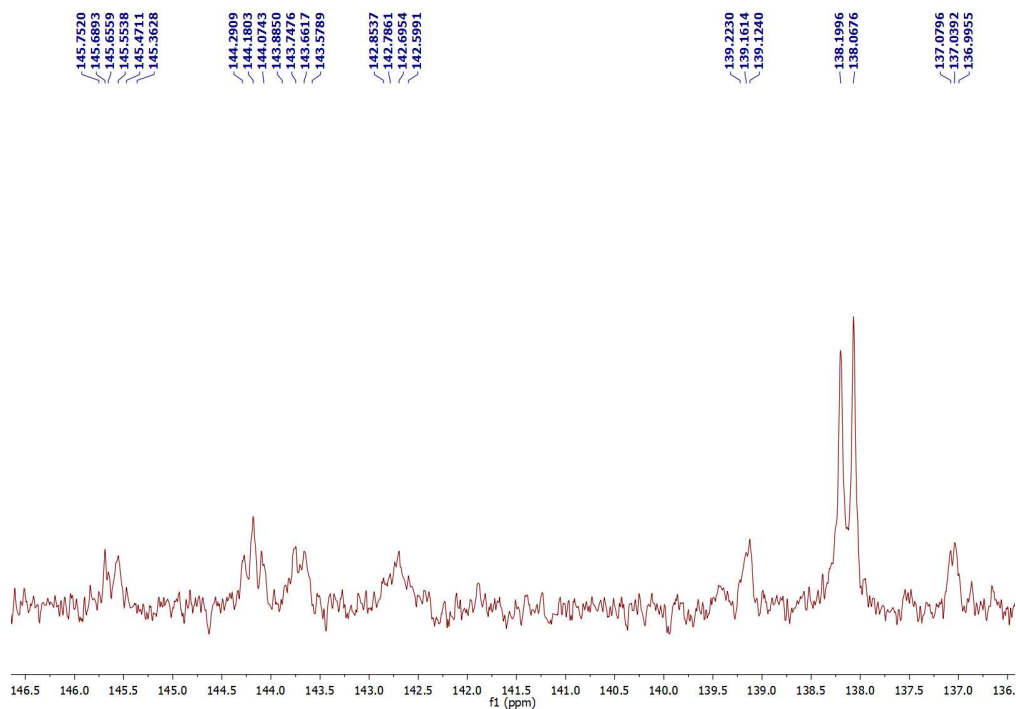

Expanded  $^{13}\text{C}$  NMR spectrum of 3,3'-((3,5,6-trifluoropyridine-2,4-diyl)bis(oxy))dibenzaldehyde **4a**

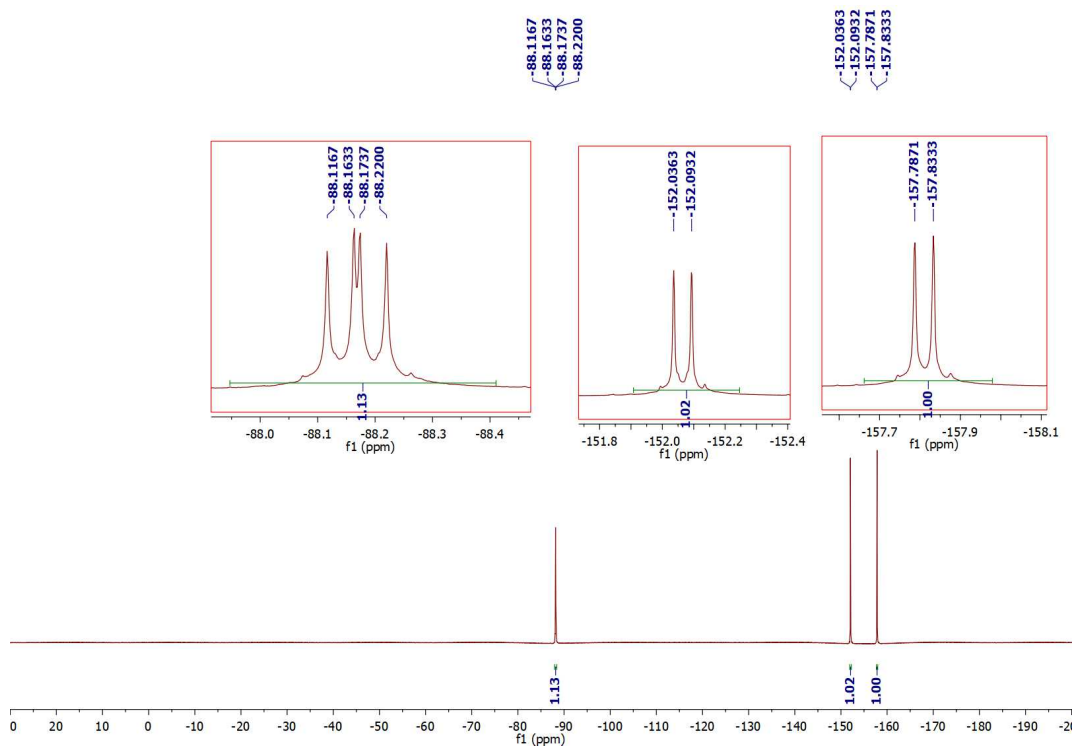

$^{19}\text{F}$  NMR spectrum of 3,3'-((3,5,6-trifluoropyridine-2,4-diyl)bis(oxy))dibenzaldehyde **4a**

9. NMR spectra of 3,3',3''-((3,5-difluoropyridine-2,4,6-triyl)tris(oxy))tribenzaldehyde **4b**

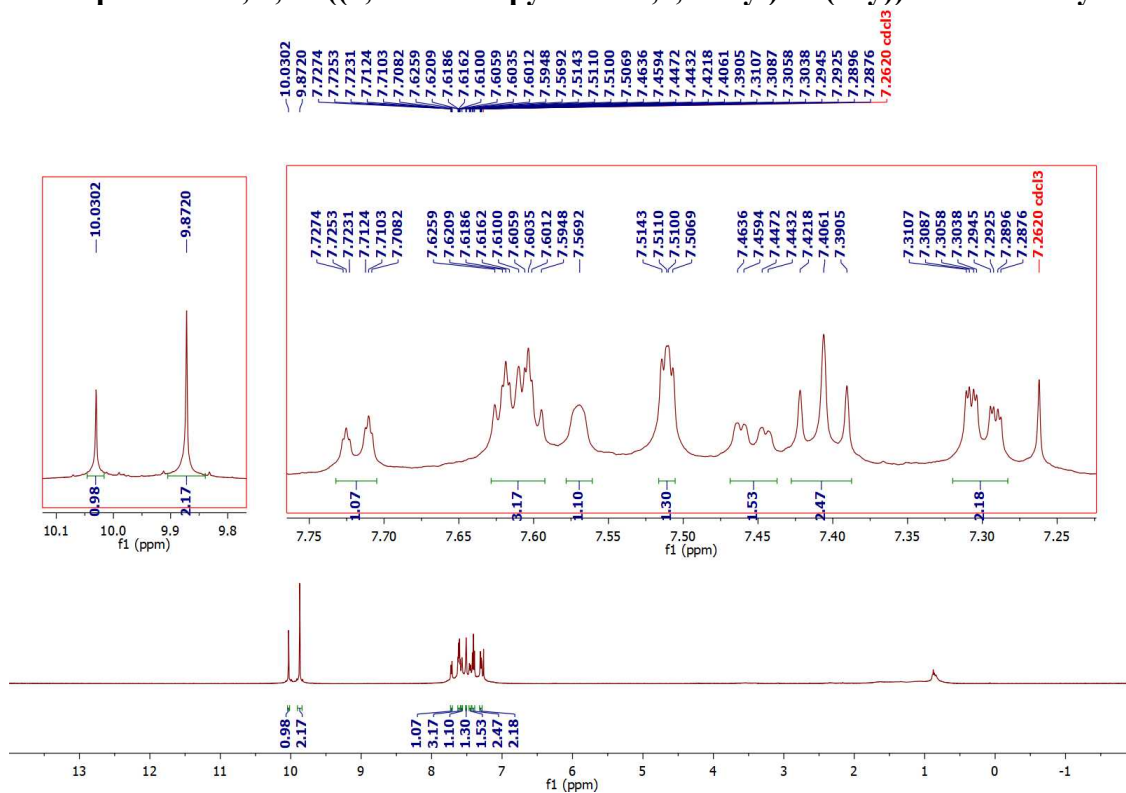

<sup>1</sup>H NMR spectrum of 3,3',3''-((3,5-difluoropyridine-2,4,6-triyl)tris(oxy))tribenzaldehyde **4b**

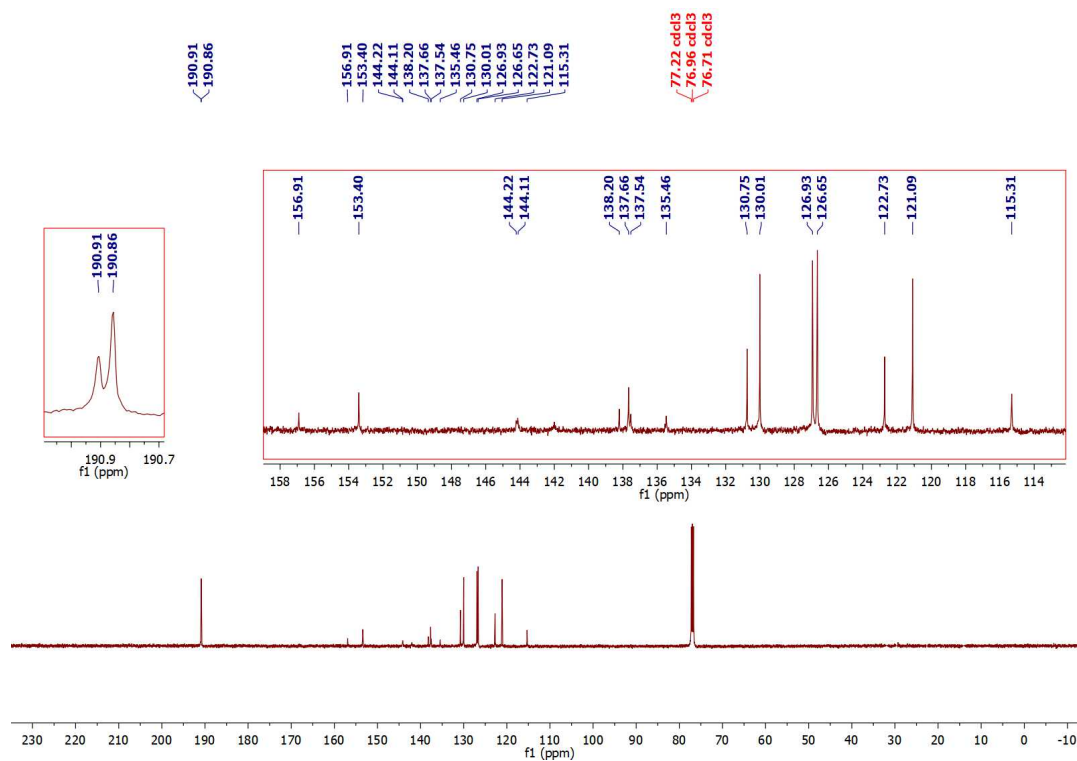

<sup>13</sup>C NMR spectrum of 3,3',3''-((3,5-difluoropyridine-2,4,6-triyl)tris(oxy))tribenzaldehyde **4b**

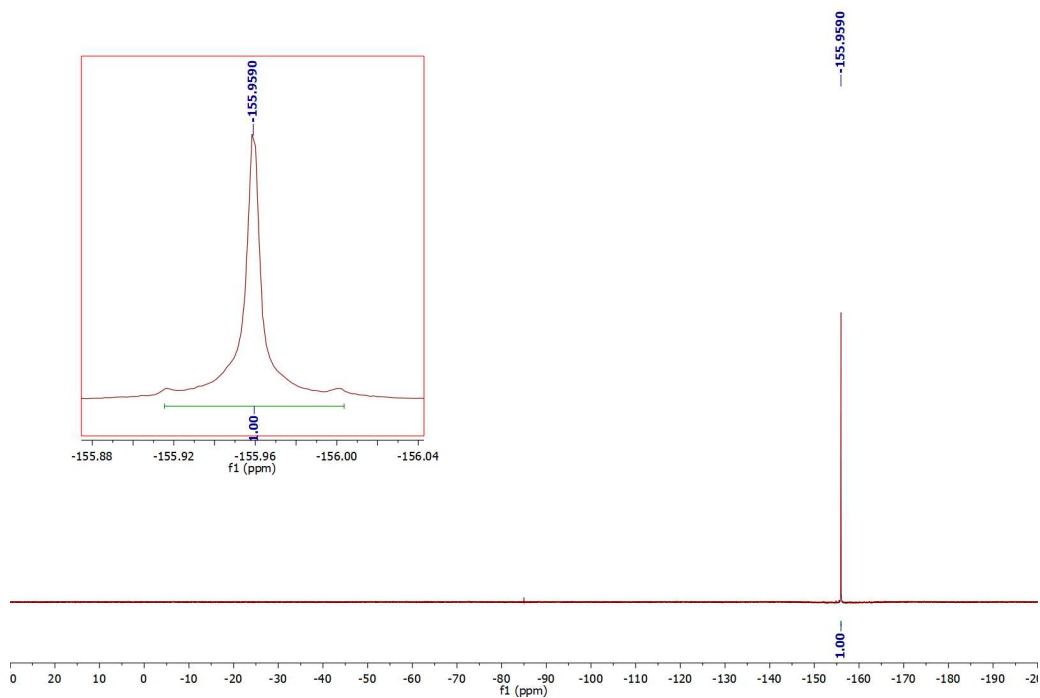

<sup>19</sup>F NMR spectrum of 3,3',3''-((3,5-difluoropyridine-2,4,6-triyl)tris(oxy))tribenzaldehyde **4b**

**10. NMR spectra of 3,3'-((3,5-difluoro-4-(4-formylphenoxy)pyridine-2,6-diyl)bis(oxy))dibenzaldehyde **4c****

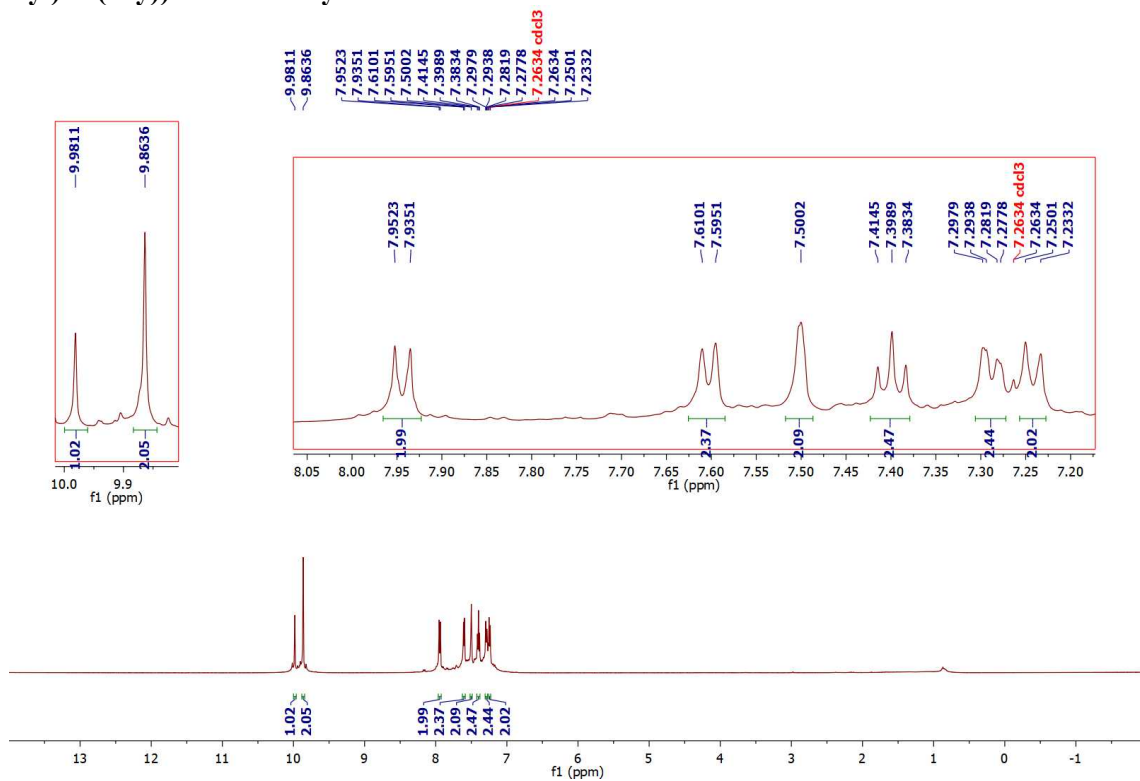

<sup>1</sup>H NMR spectrum of 3,3'-((3,5-difluoro-4-(4-formylphenoxy)pyridine-2,6-diyl)bis(oxy))dibenzaldehyde **4c**

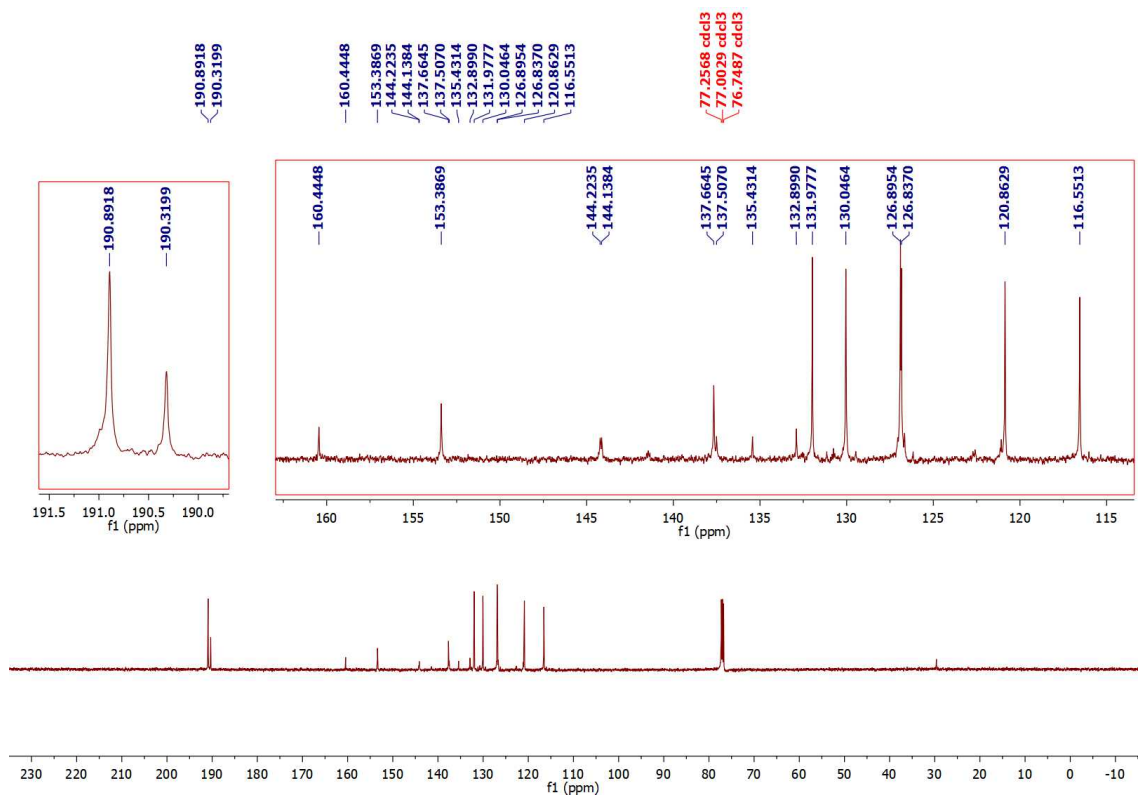

$^{13}\text{C}$  NMR spectrum of 3,3'-((3,5-difluoro-4-(4-formylphenoxy)pyridine-2,6-diyl)bis(oxy))dibenzaldehyde **4c**

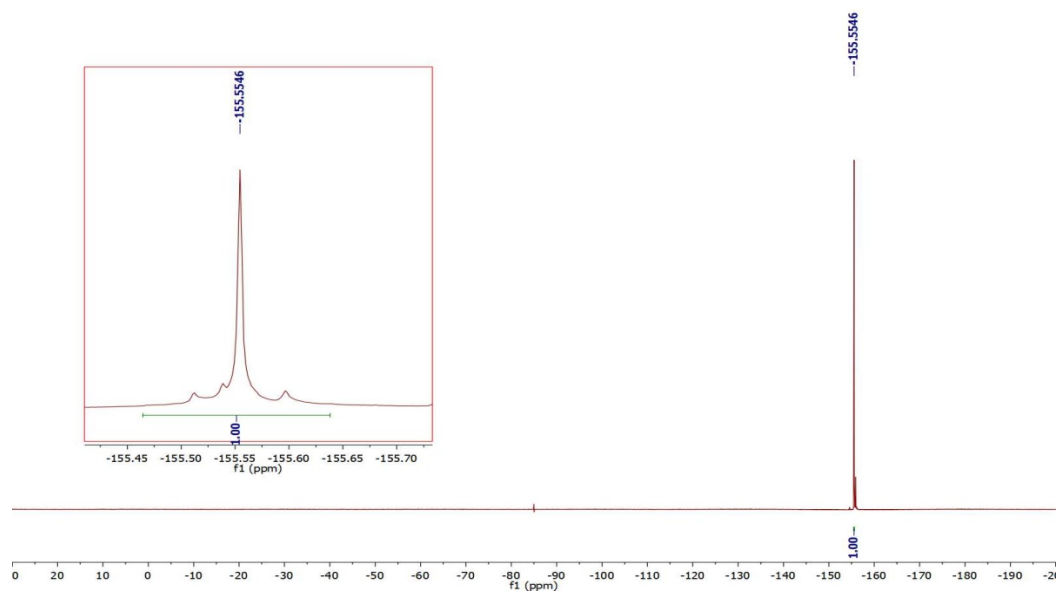

$^{19}\text{F}$  NMR spectrum of 3,3'-((3,5-difluoro-4-(4-formylphenoxy)pyridine-2,6-diyl)bis(oxy))dibenzaldehyde **4c**

# 11. NMR spectra of synthesized TRAMs containing tetrafluoropyridine subunits 9 a-p

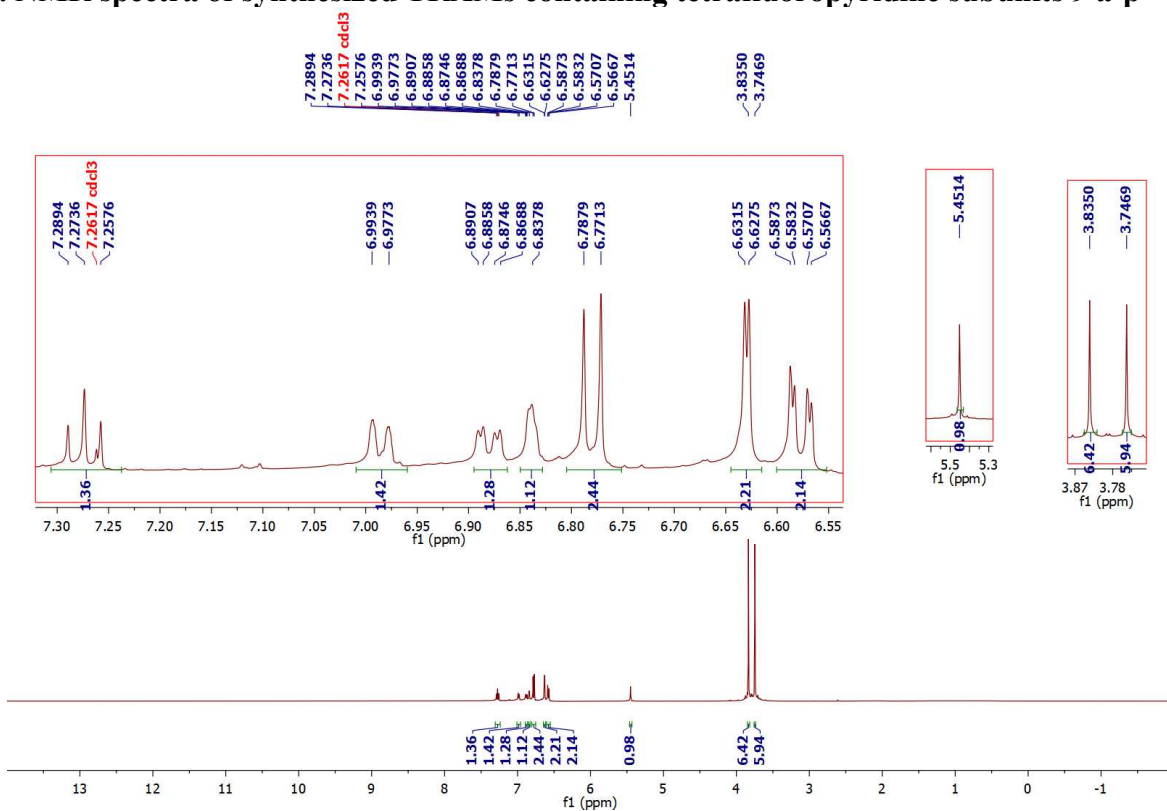

<sup>1</sup>H NMR spectrum of 4-(3-(bis(3,4-dimethoxyphenyl)methyl)phenoxy)-2,3,5,6-tetrafluoropyridine 9a

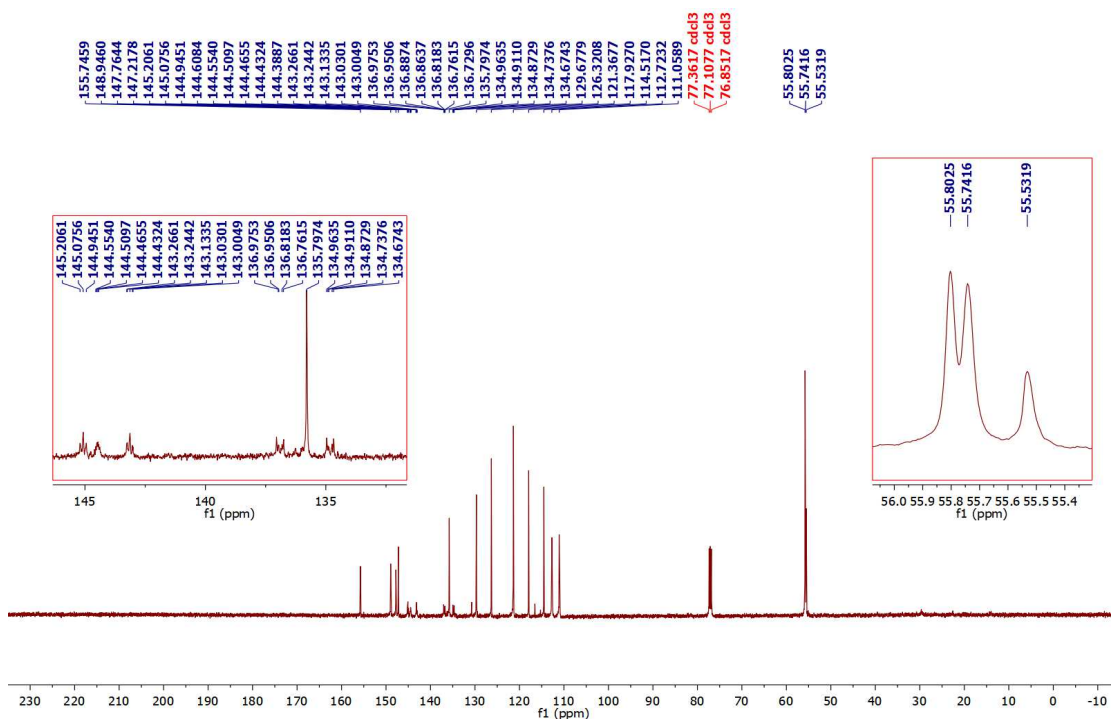

<sup>13</sup>C NMR spectrum of 4-(3-(bis(3,4-dimethoxyphenyl)methyl)phenoxy)-2,3,5,6-tetrafluoropyridine 9a

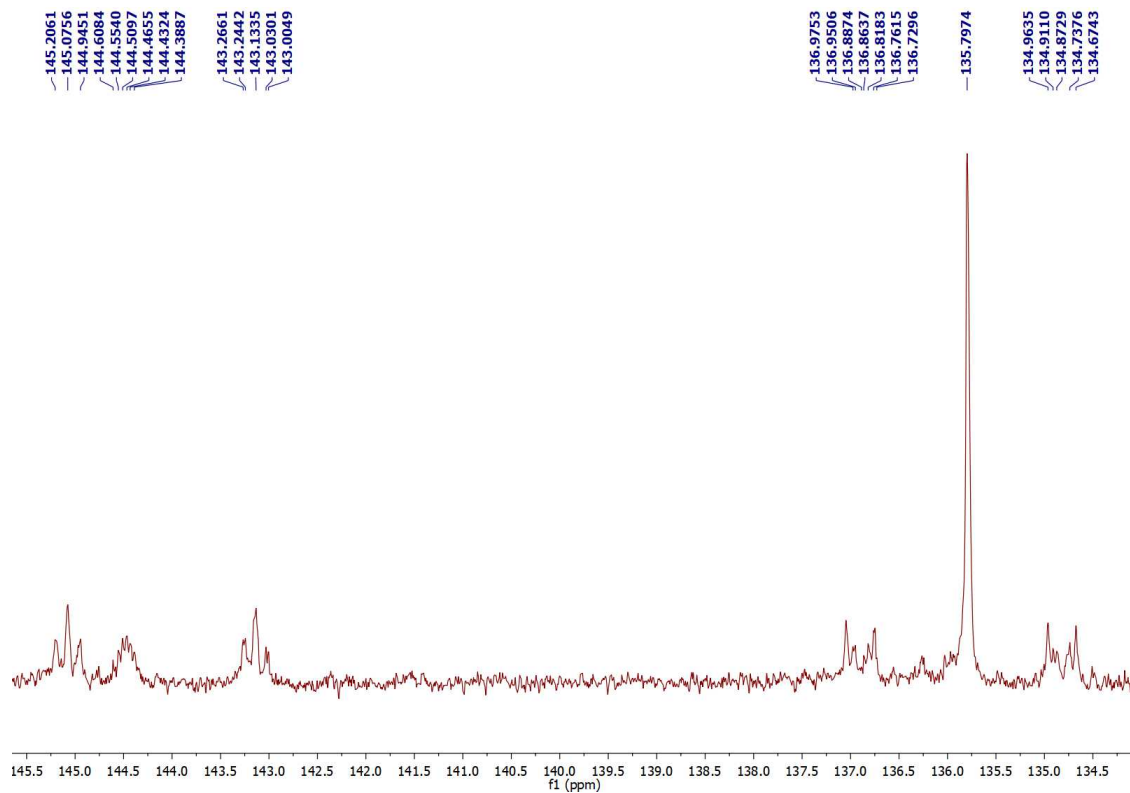

Expanded  $^{13}\text{C}$  NMR spectrum of 4-(3-(bis(3,4-dimethoxyphenyl)methyl)phenoxy)-2,3,5,6-tetrafluoropyridine **9a**

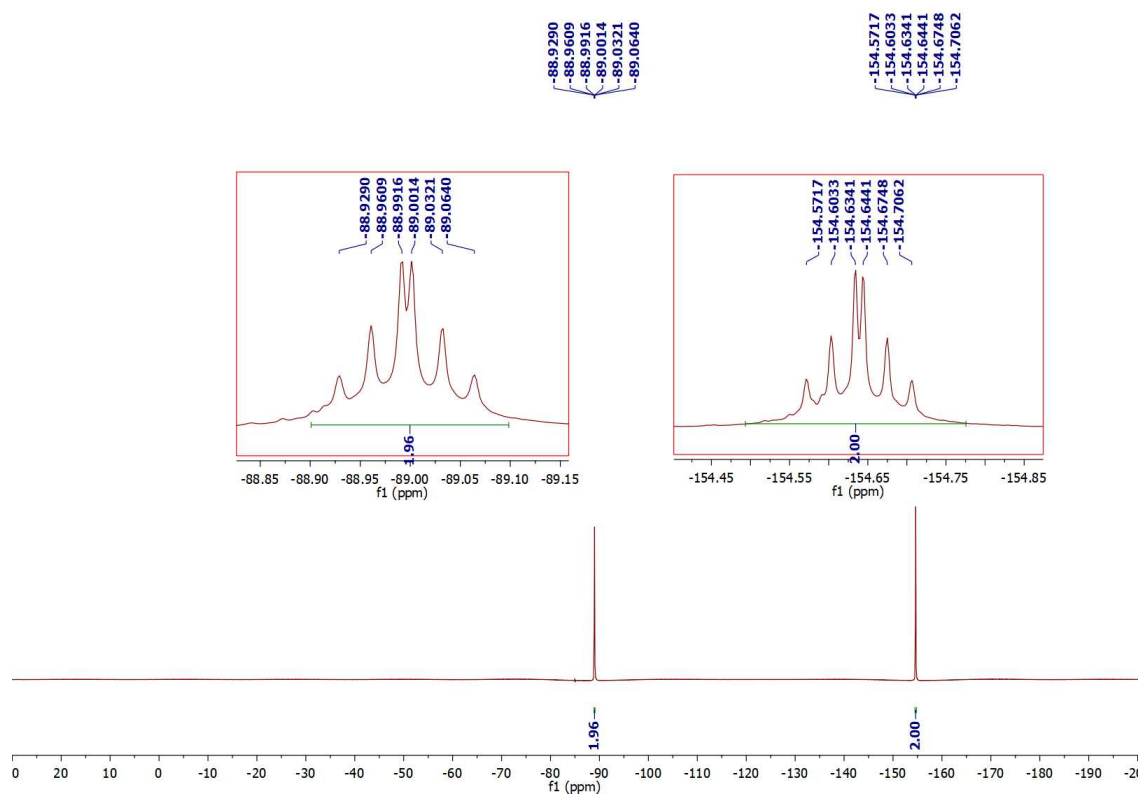

$^{19}\text{F}$  NMR spectrum of 4-(3-(bis(3,4-dimethoxyphenyl)methyl)phenoxy)-2,3,5,6-tetrafluoropyridine **9a**



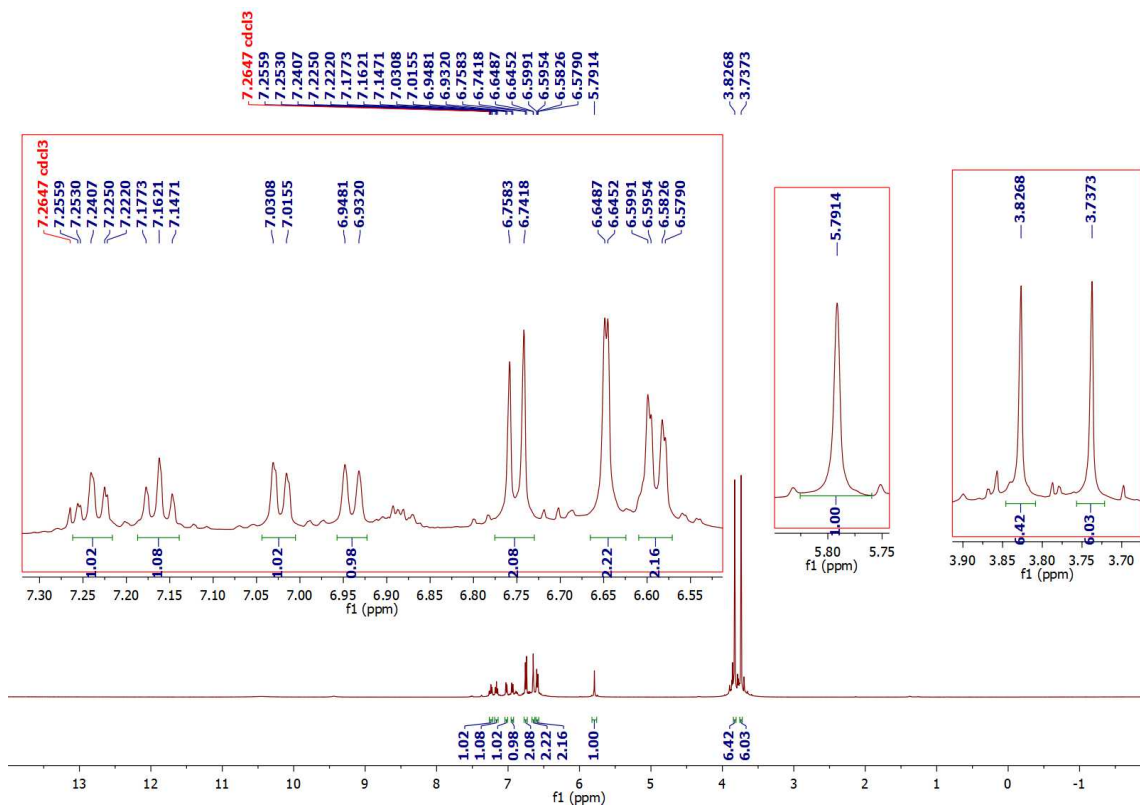

<sup>1</sup>H NMR spectrum of 4-(2-(bis(3,4-dimethoxyphenyl)methyl)phenoxy)-2,3,5,6-tetrafluoropyridine **9b**

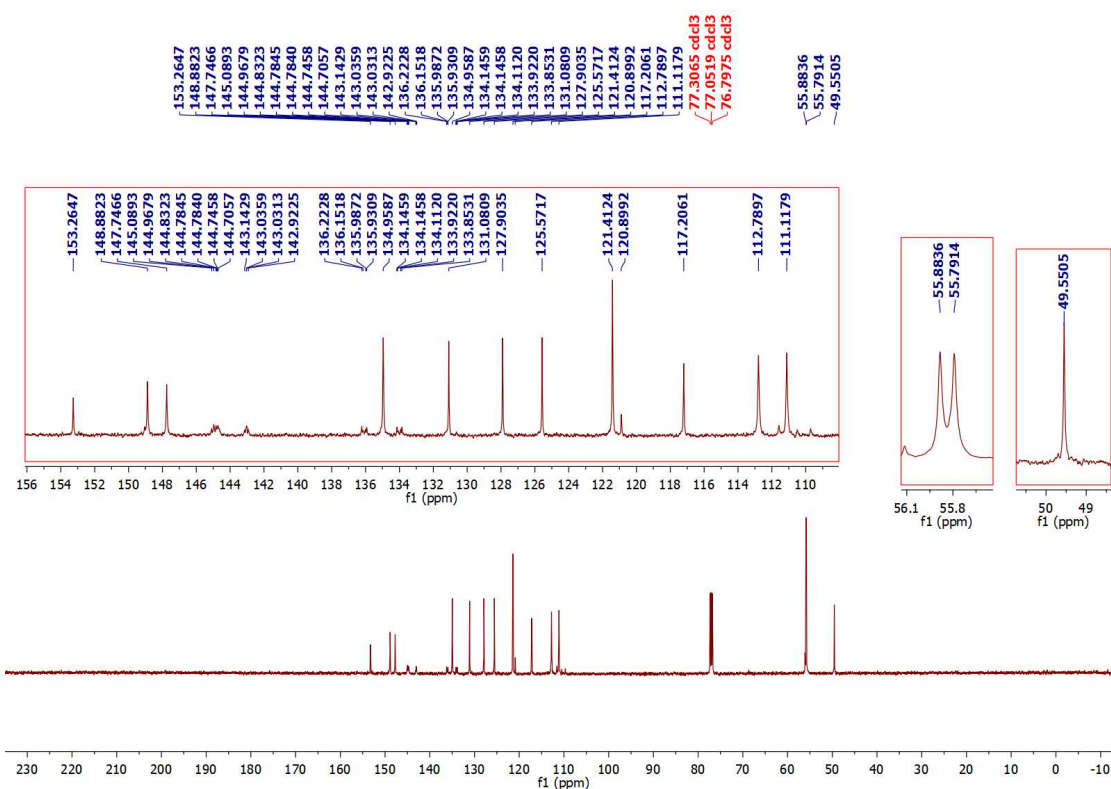

<sup>13</sup>C NMR spectrum of 4-(2-(bis(3,4-dimethoxyphenyl)methyl)phenoxy)-2,3,5,6-tetrafluoropyridine **9b**

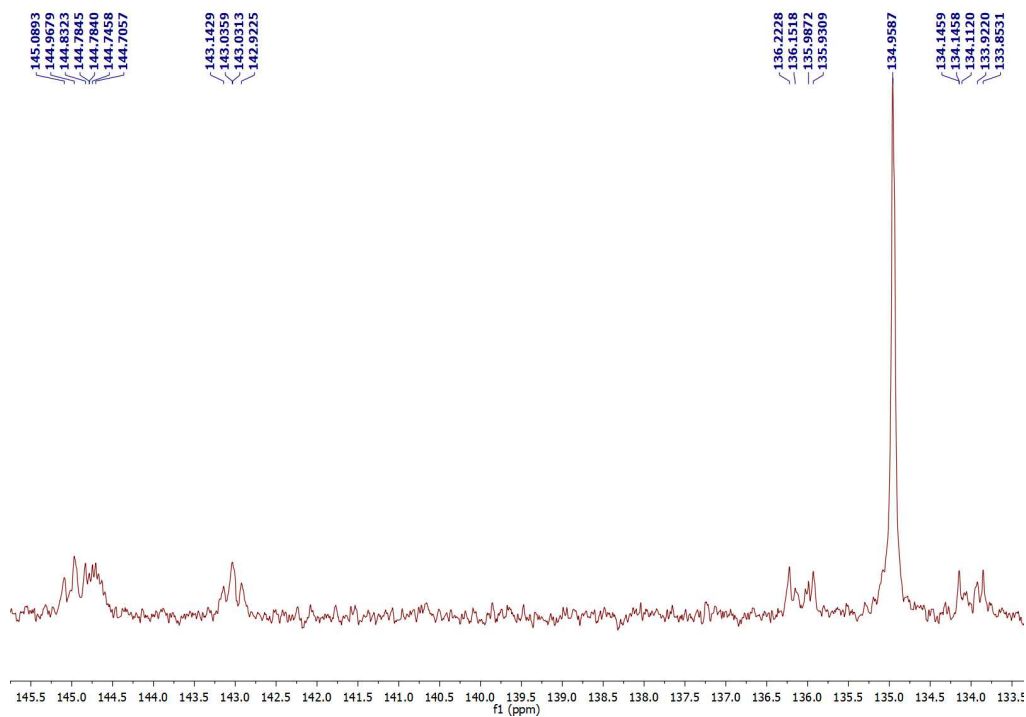

Expanded  $^{13}\text{C}$  NMR spectrum of 4-(2-(bis(3,4-dimethoxyphenyl)methyl)phenoxy)-2,3,5,6-tetrafluoropyridine **9b**

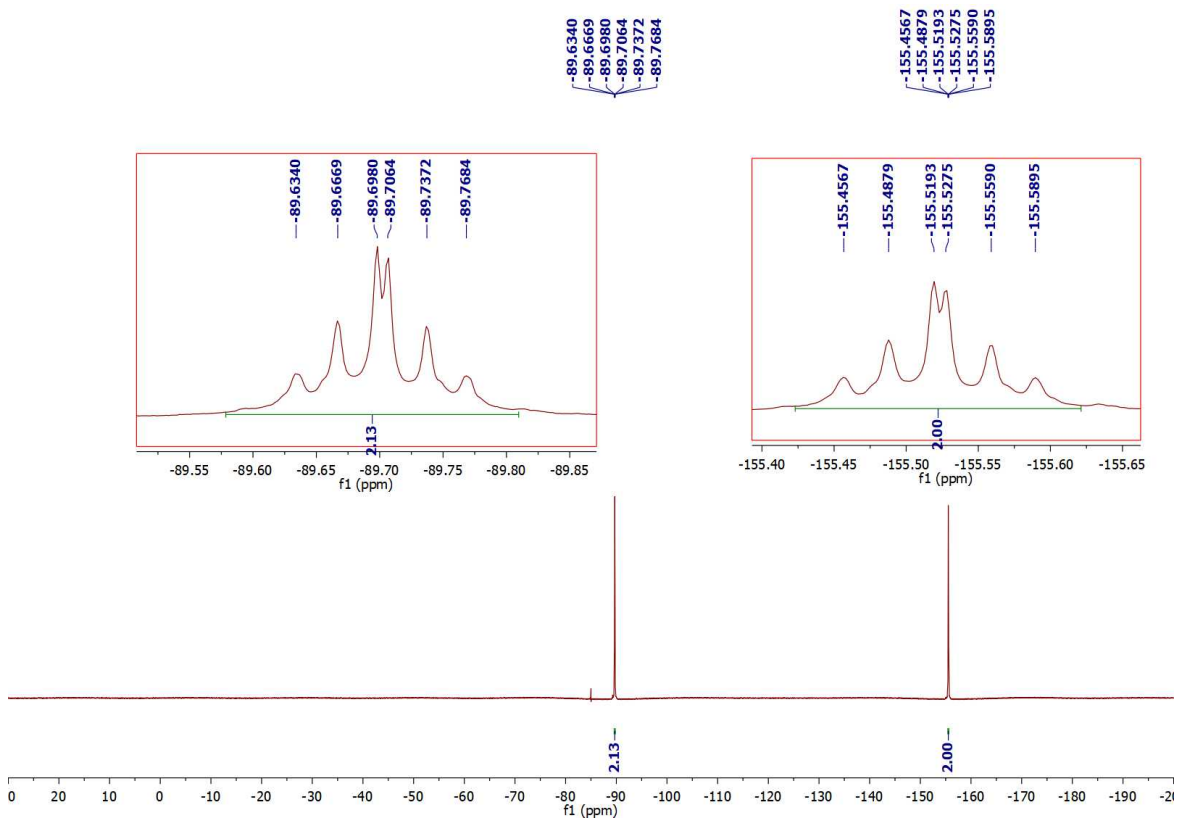

$^{19}\text{F}$  NMR spectrum of 4-(2-(bis(3,4-dimethoxyphenyl)methyl)phenoxy)-2,3,5,6-tetrafluoropyridine **9b**

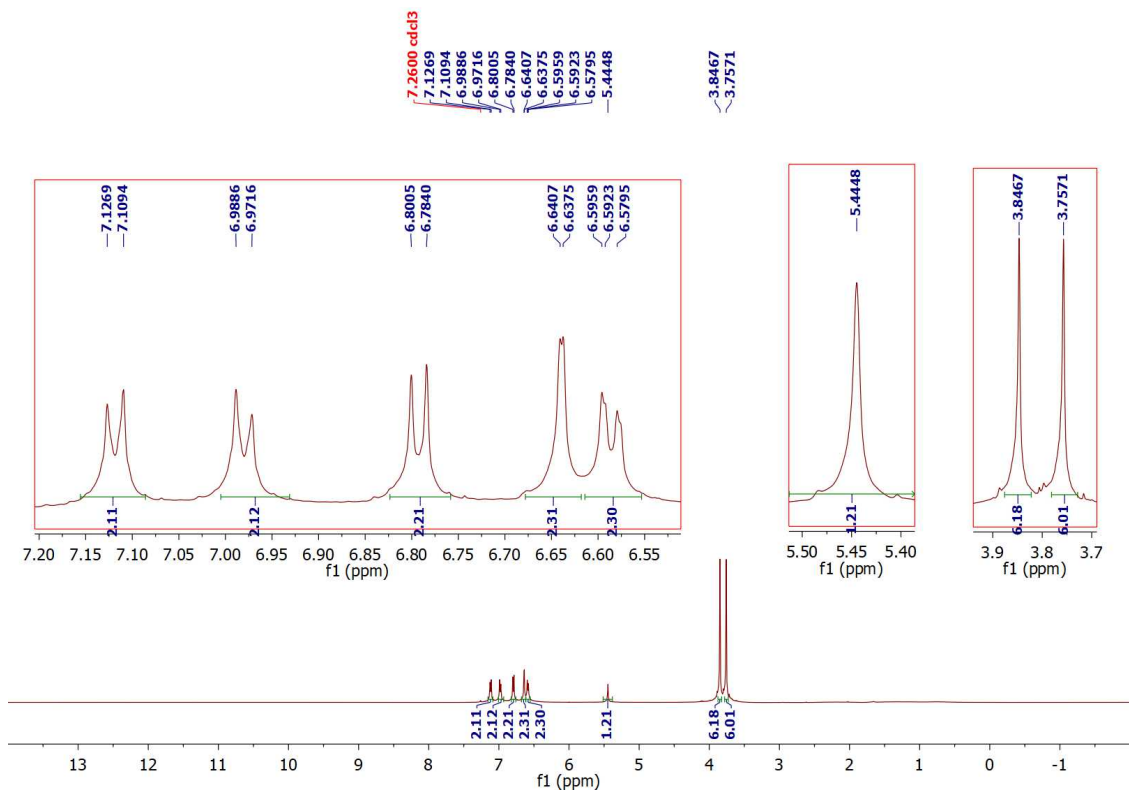

<sup>1</sup>H NMR spectrum of 4-(4-(bis(3,4-dimethoxyphenyl)methyl)phenoxy)-2,3,5,6-tetrafluoropyridine **9c**

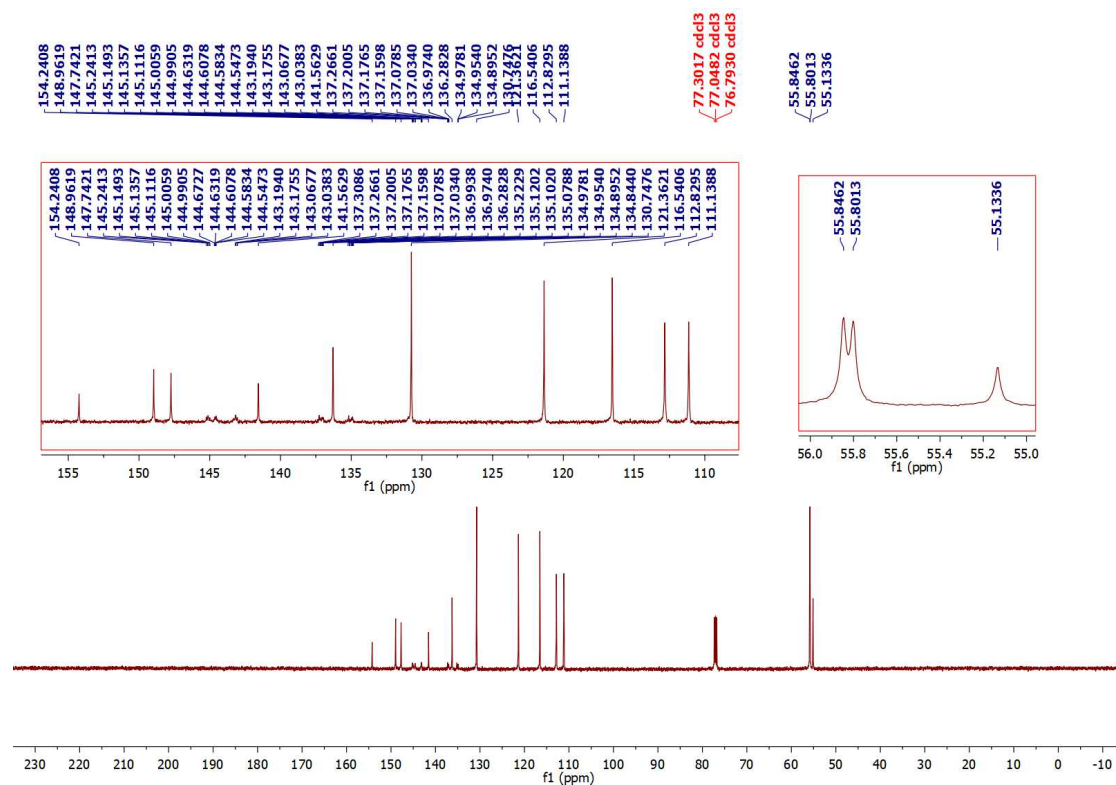

<sup>13</sup>C NMR spectrum of 4-(4-(bis(3,4-dimethoxyphenyl)methyl)phenoxy)-2,3,5,6-tetrafluoropyridine **9c**

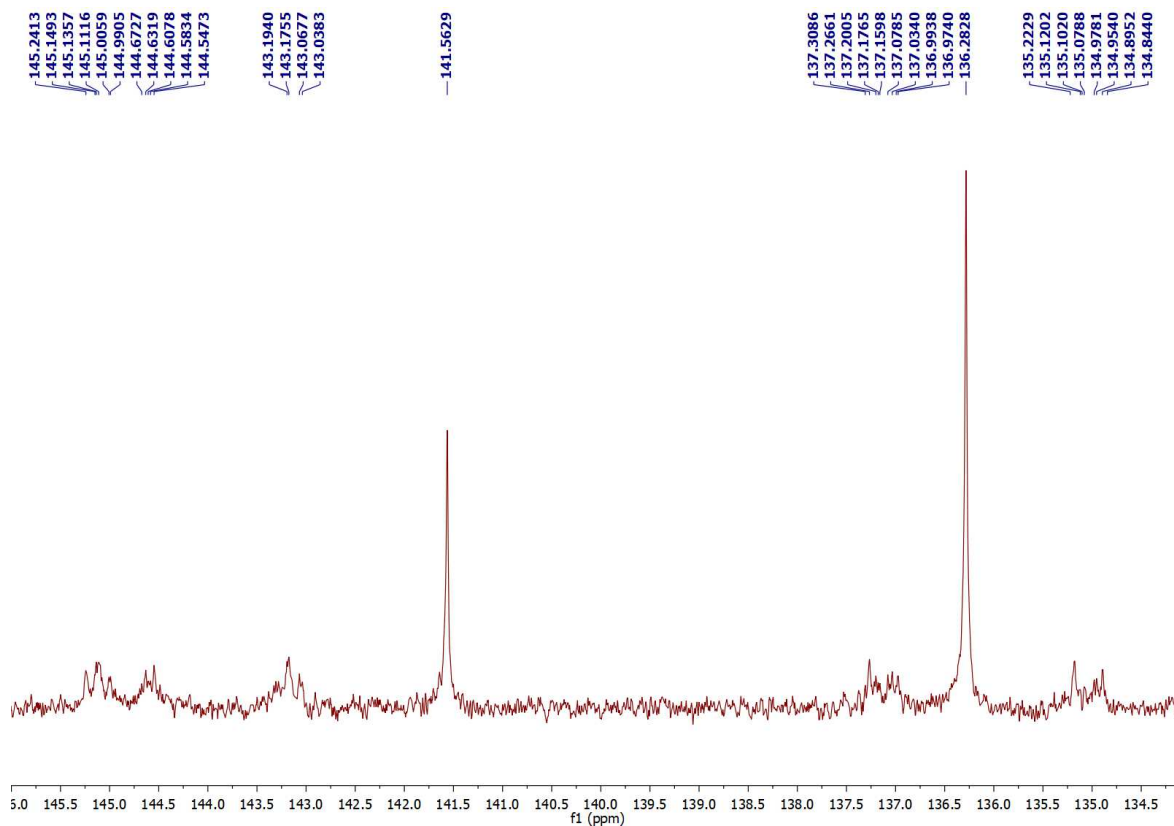

Expanded  $^{13}\text{C}$  NMR spectrum of 4-(4-(bis(3,4-dimethoxyphenyl)methyl)phenoxy)-2,3,5,6-tetrafluoropyridine **9c**

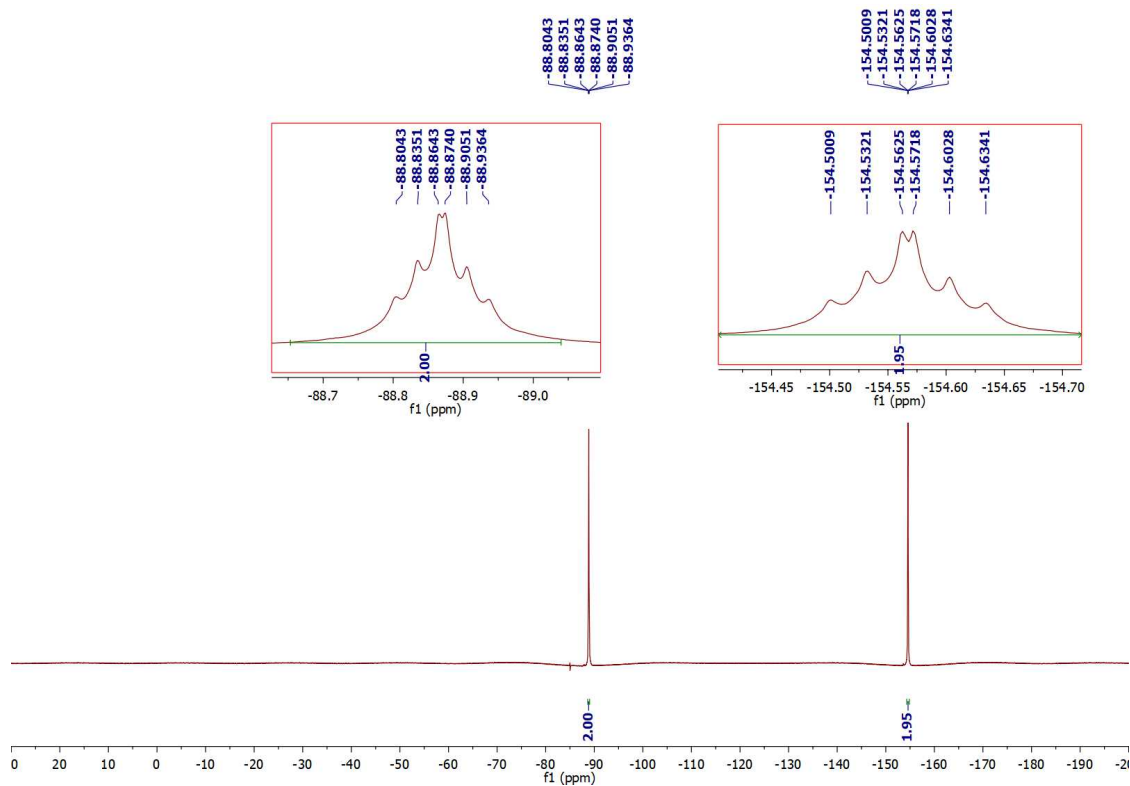

$^{19}\text{F}$  NMR spectrum of 4-(4-(bis(3,4-dimethoxyphenyl)methyl)phenoxy)-2,3,5,6-tetrafluoropyridine **9c**

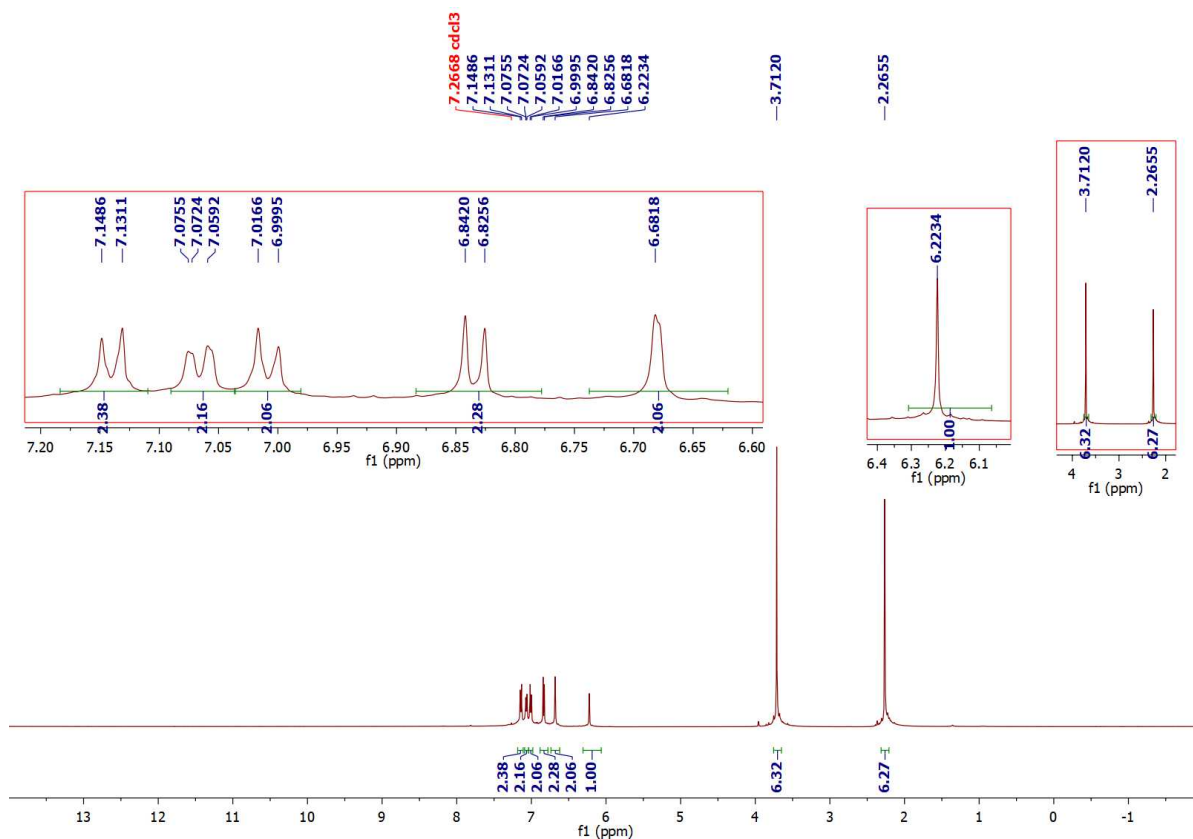

<sup>1</sup>H NMR spectrum of 4-(4-(bis(2-methoxy-5-methylphenyl)methyl)phenoxy)-2,3,5,6-tetrafluoropyridine **9d**

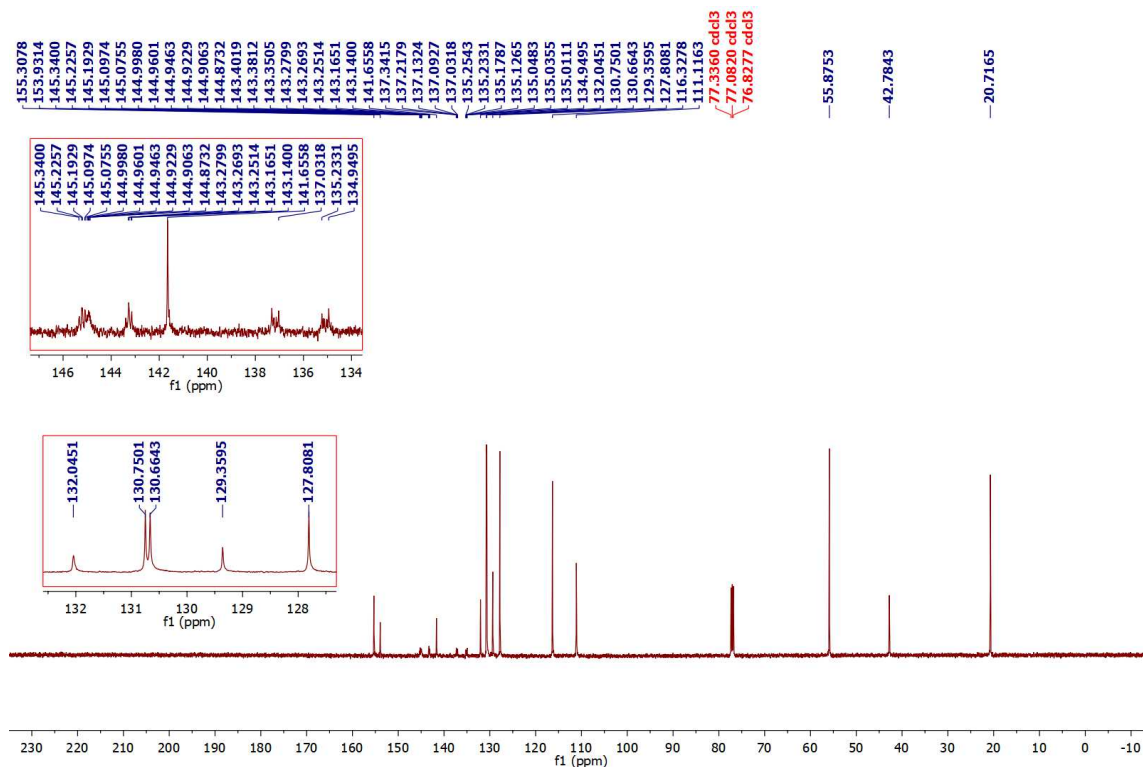

<sup>13</sup>C NMR spectrum of 4-(4-(bis(2-methoxy-5-methylphenyl)methyl)phenoxy)-2,3,5,6-tetrafluoropyridine **9d**

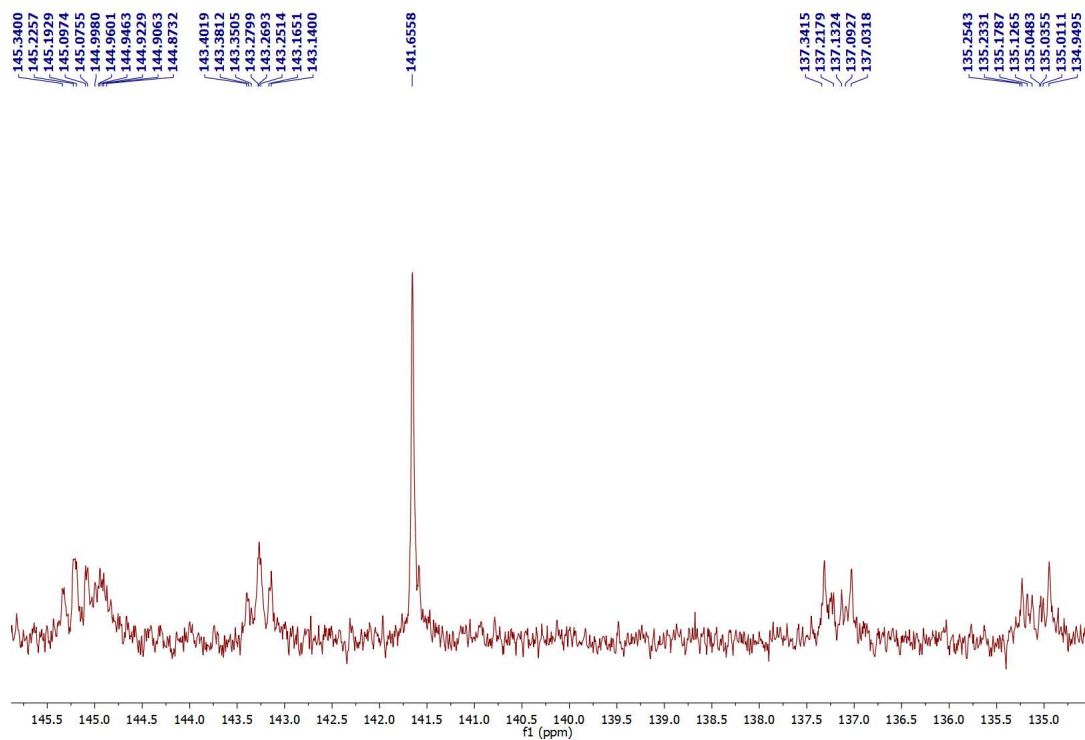

Expanded  $^{13}\text{C}$  NMR spectrum of 4-(4-(bis(2-methoxy-5-methylphenyl)methyl)phenoxy)-2,3,5,6-tetrafluoropyridine **9d**

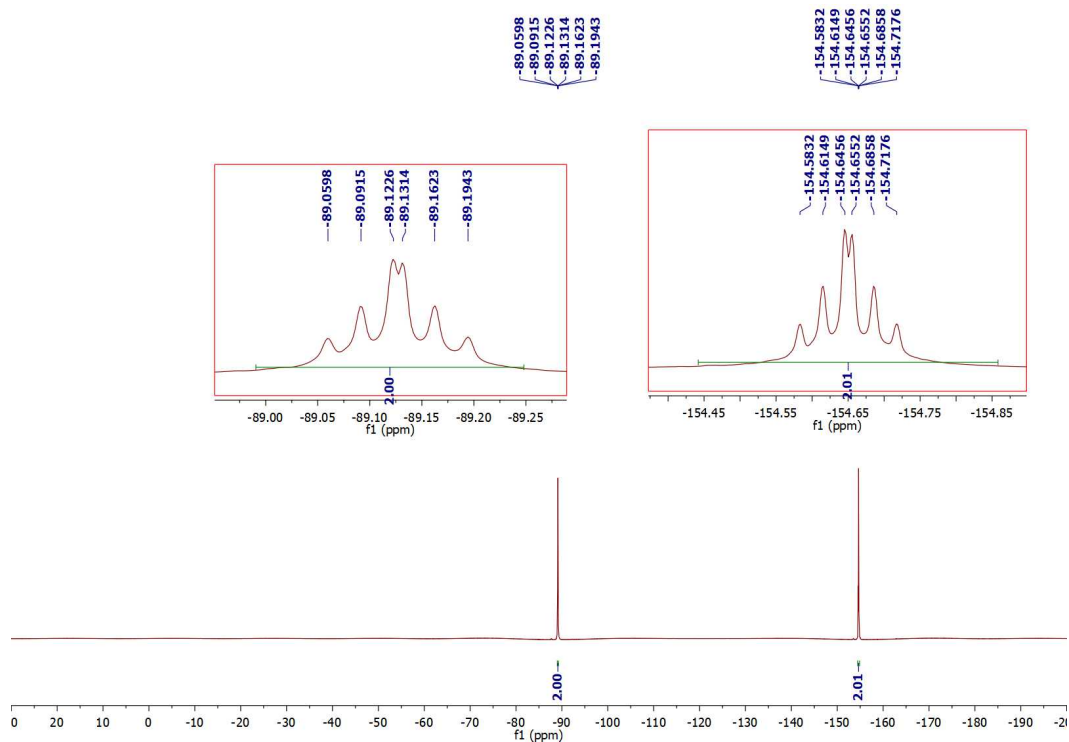

$^{19}\text{F}$  NMR spectrum of 4-(4-(bis(2-methoxy-5-methylphenyl)methyl)phenoxy)-2,3,5,6-tetrafluoropyridine **9d**

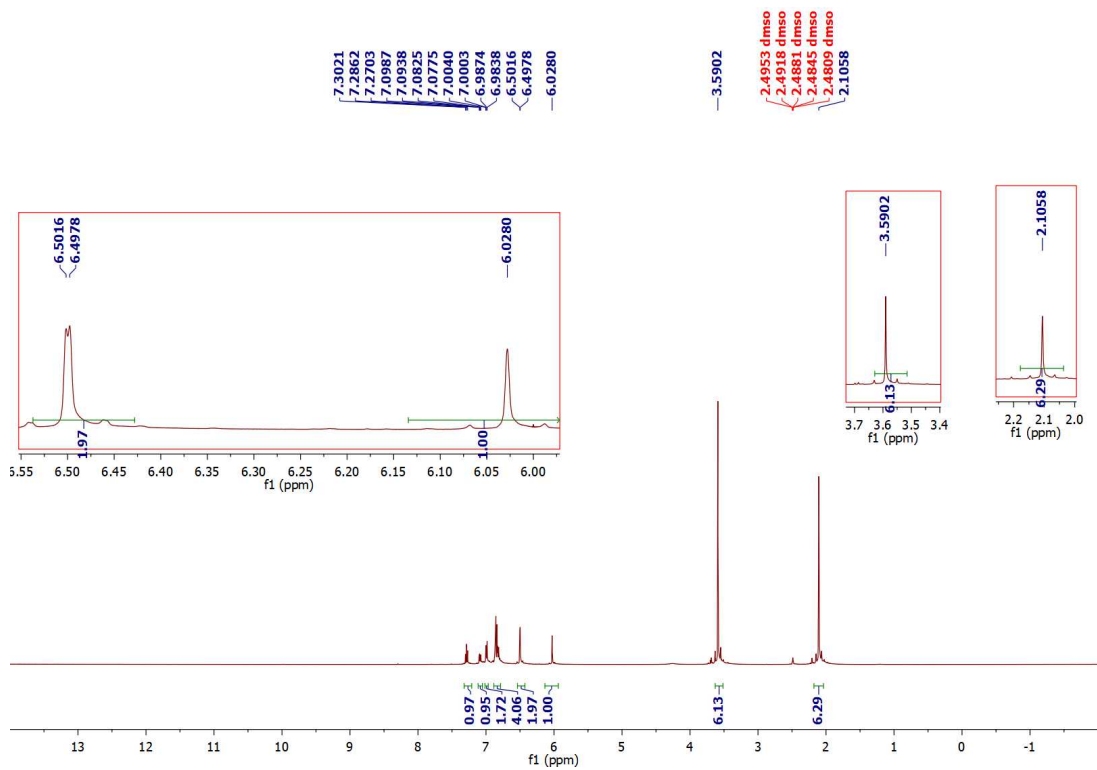

<sup>1</sup>H NMR spectrum of 4-(3-(bis(2-methoxy-5-methylphenyl)methyl)phenoxy)-2,3,5,6-tetrafluoropyridine **9e**

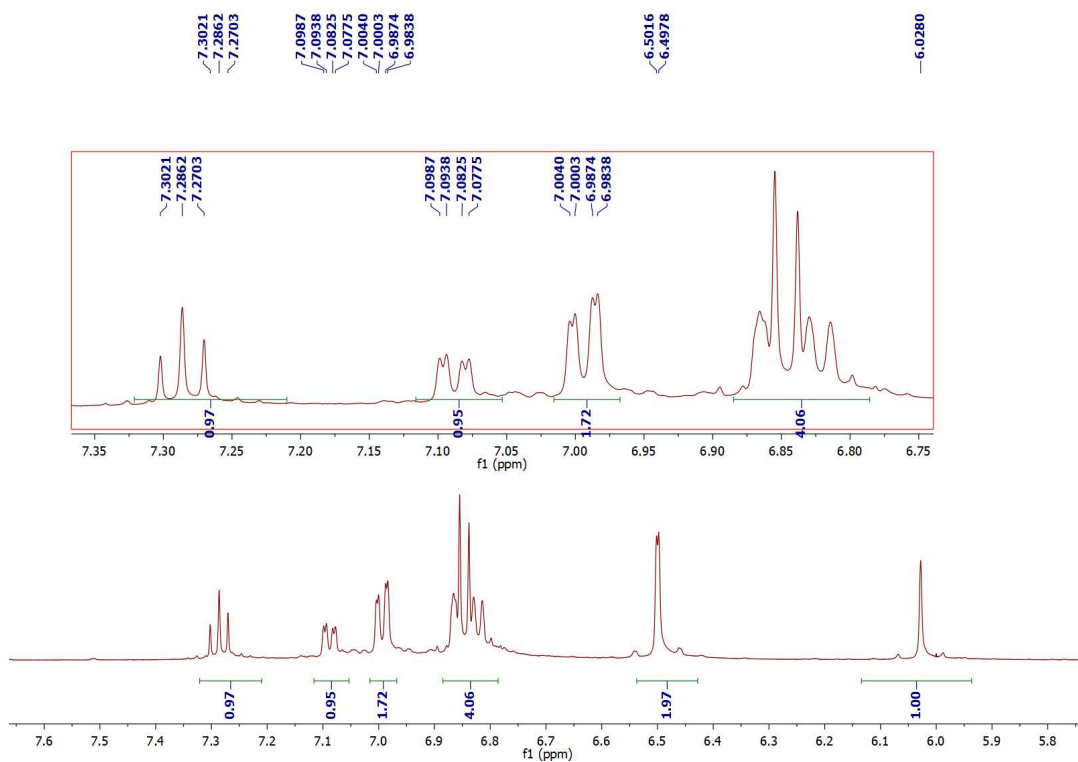

Expanded <sup>1</sup>H NMR spectrum of 4-(3-(bis(2-methoxy-5-methylphenyl)methyl)phenoxy)-2,3,5,6-tetrafluoropyridine **9e**

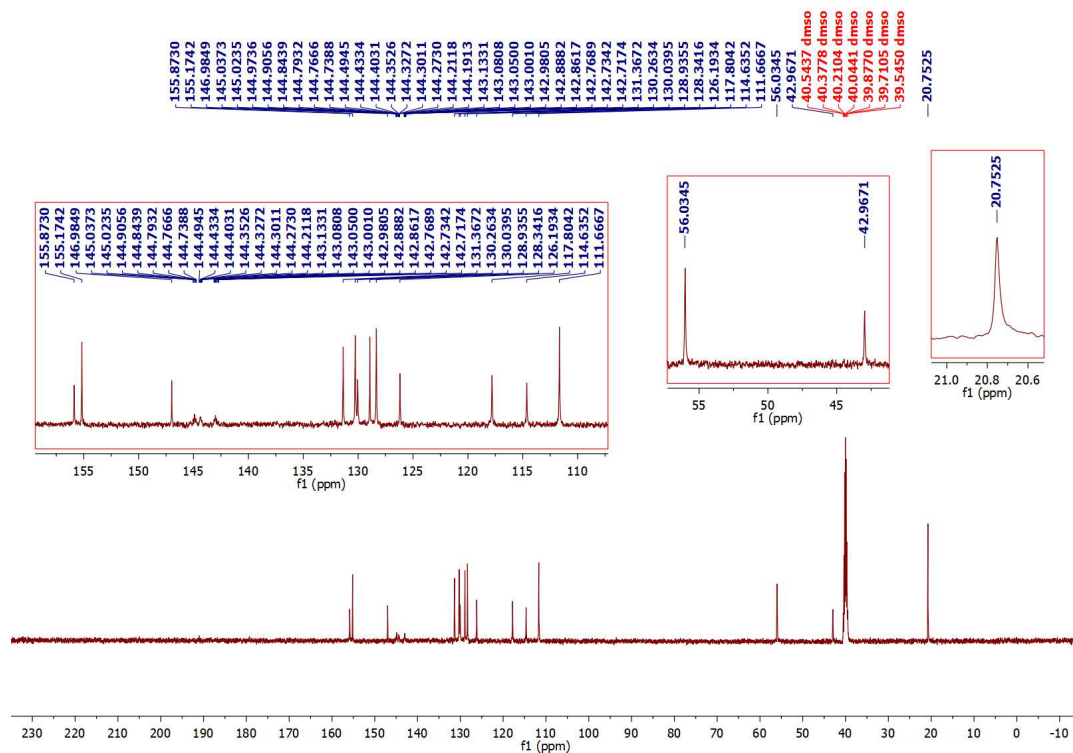

13C NMR spectrum of 4-(3-(bis(2-methoxy-5-methylphenyl)methyl)phenoxy)-2,3,5,6-tetrafluoropyridine **9e**

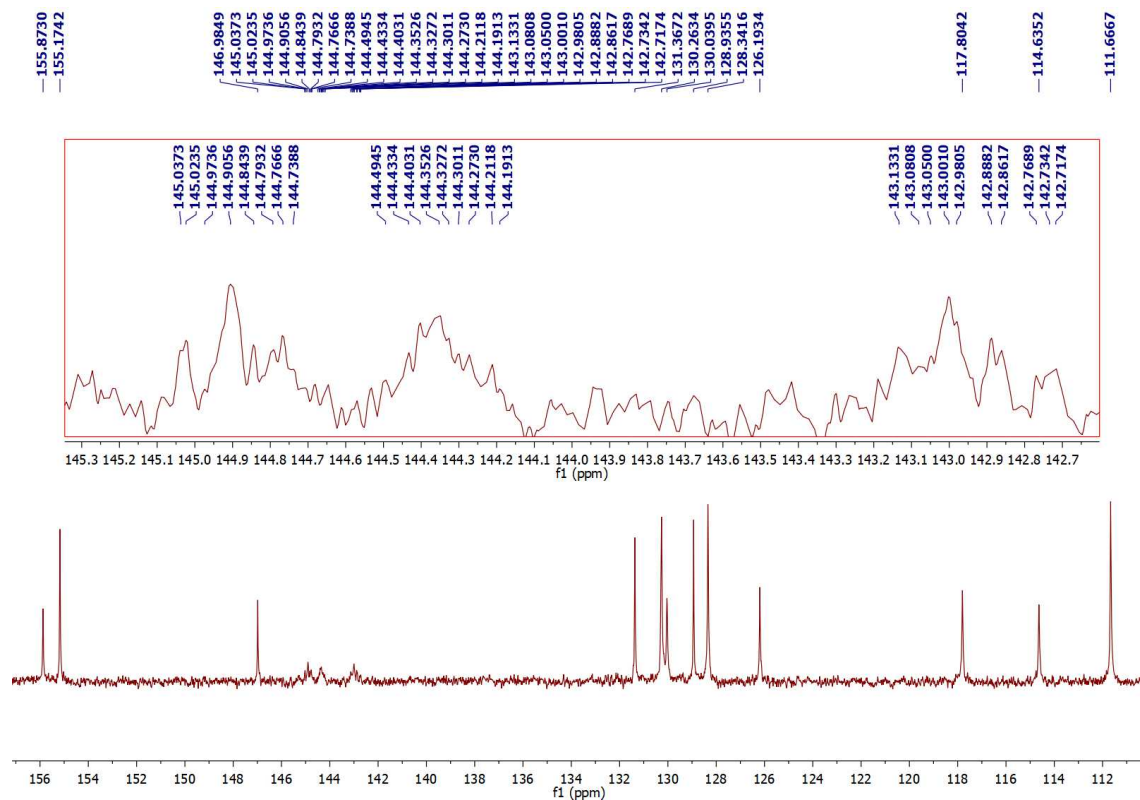

Expanded 13C NMR spectrum of 4-(3-(bis(2-methoxy-5-methylphenyl)methyl)phenoxy)-2,3,5,6-tetrafluoropyridine **9e**



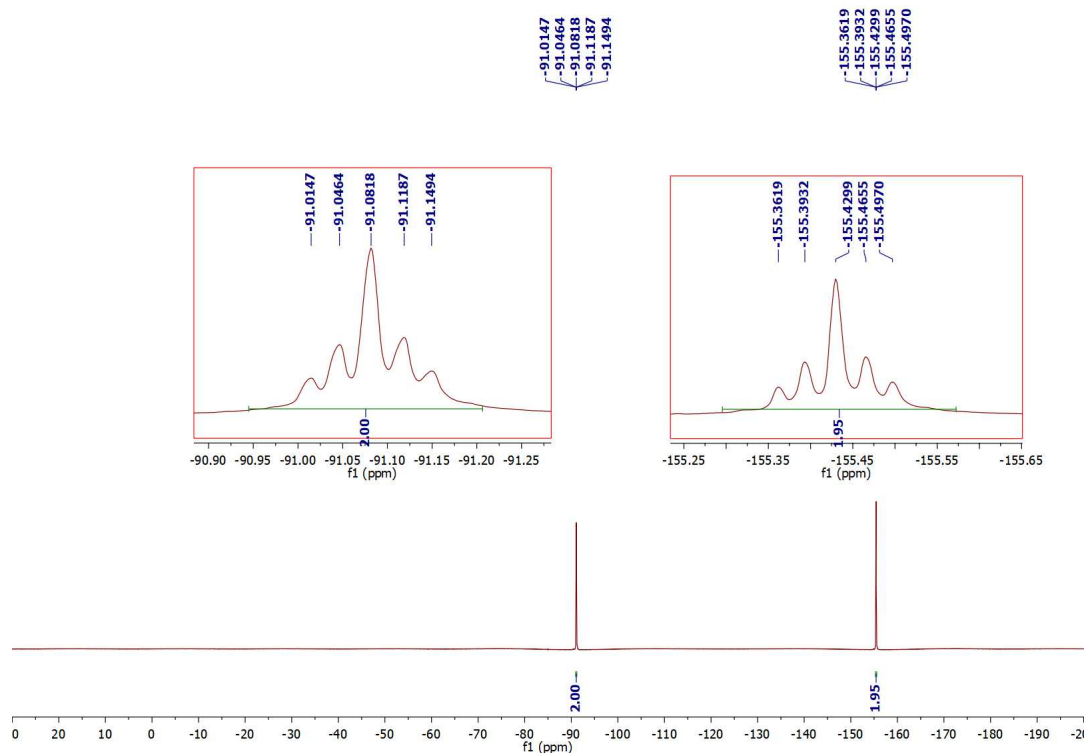

$^{19}\text{F}$  NMR spectrum of 4-(3-(bis(2-methoxy-5-methylphenyl)methyl)phenoxy)-2,3,5,6-tetrafluoropyridine **9e**

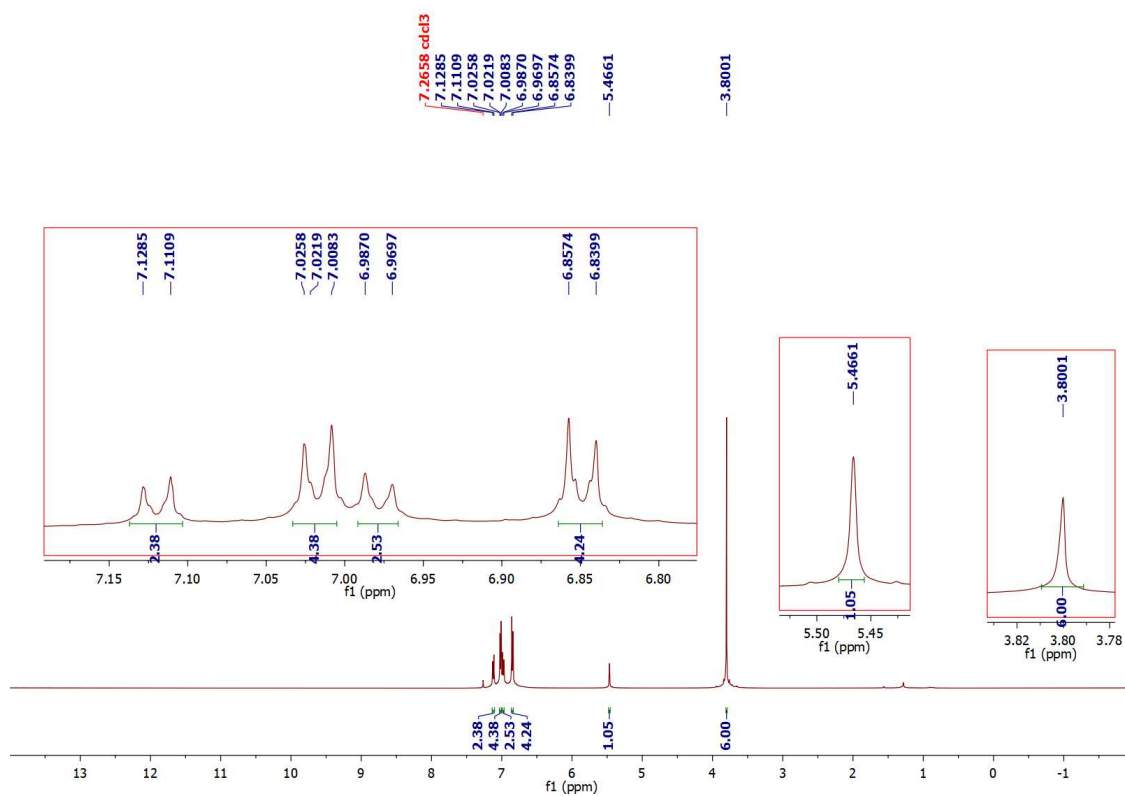

$^1\text{H}$  NMR spectrum of 4-(4-(bis(4-methoxyphenyl)methyl)phenoxy)-2,3,5,6-tetrafluoropyridine **9f**

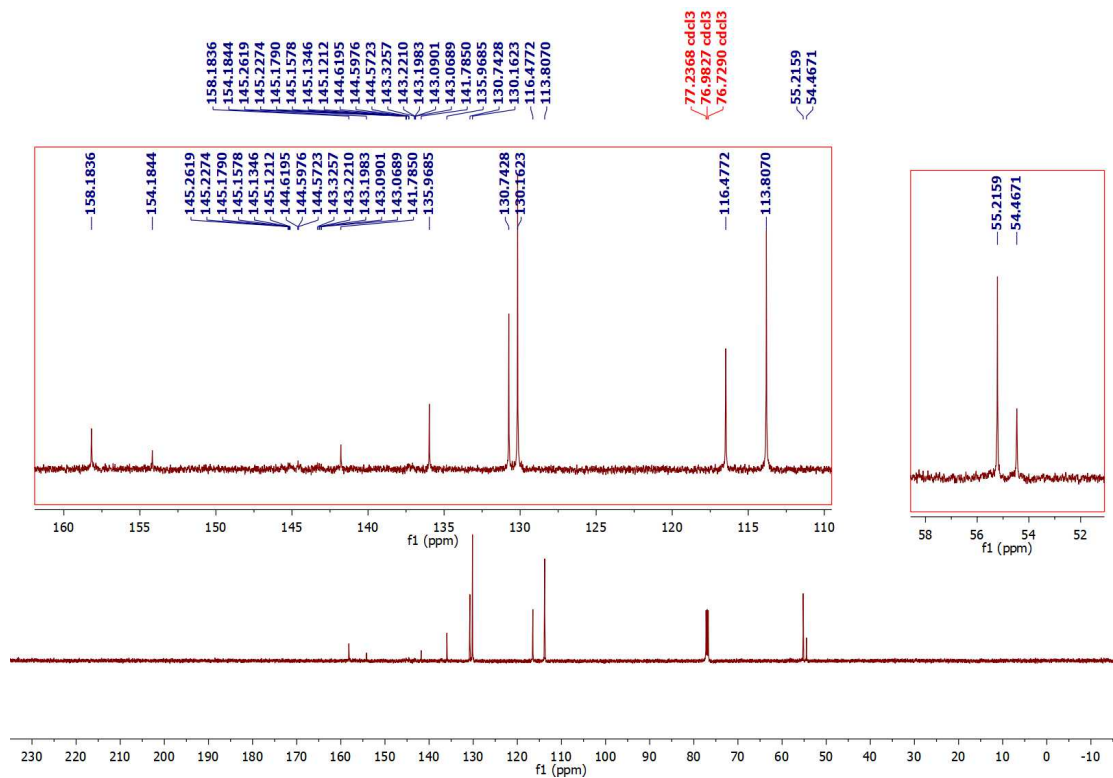

$^{13}\text{C}$  NMR spectrum of 4-(4-(bis(4-methoxyphenyl)methyl)phenoxy)-2,3,5,6-tetrafluoropyridine **9f**

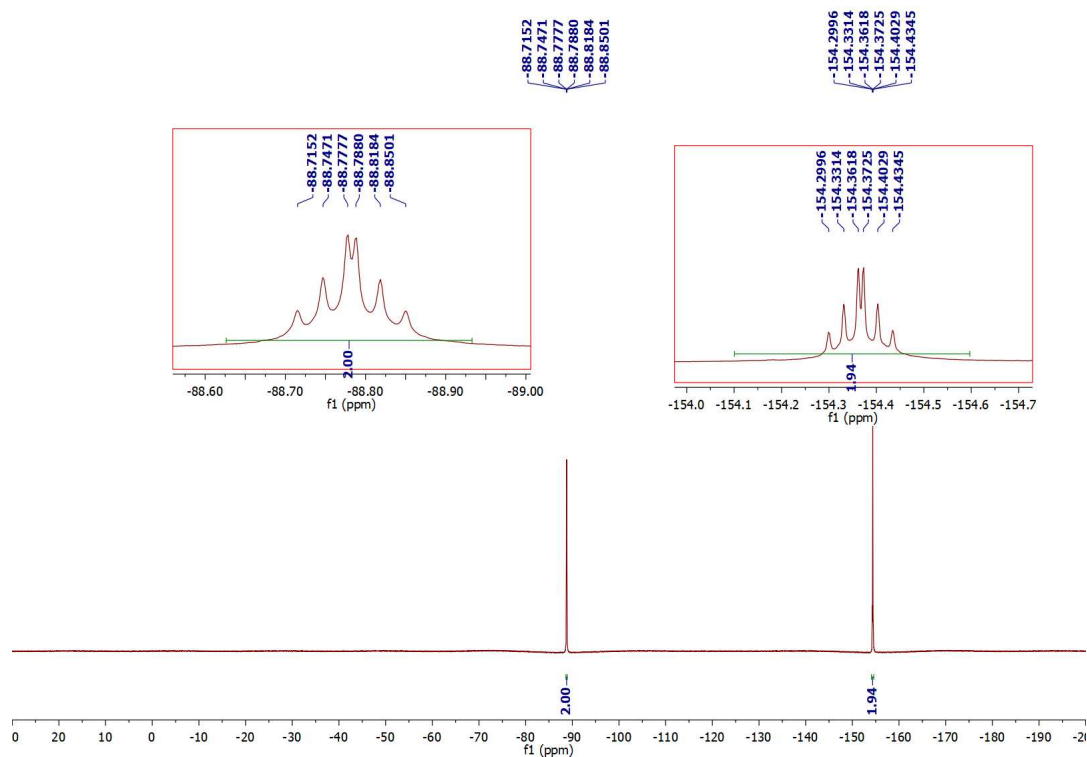

$^{19}\text{F}$  NMR spectrum of 4-(4-(bis(4-methoxyphenyl)methyl)phenoxy)-2,3,5,6-tetrafluoropyridine **9f**

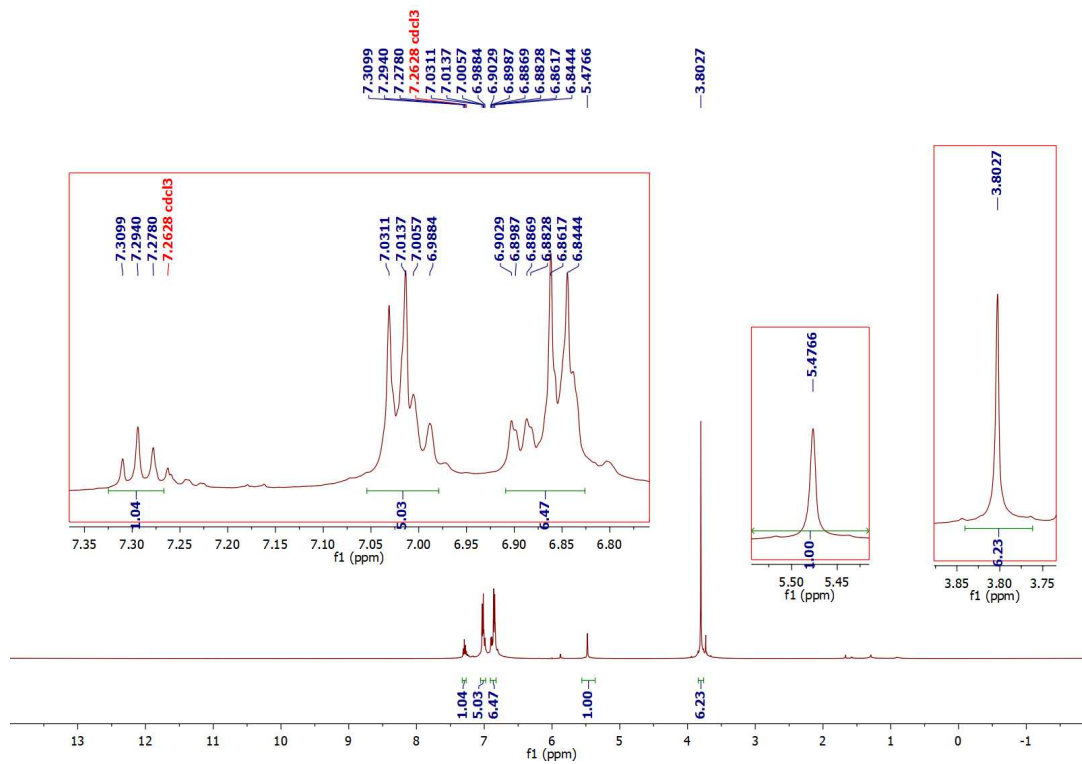

<sup>1</sup>H NMR spectrum of 4-(3-(bis(4-methoxyphenyl)methyl)phenoxy)-2,3,5,6-tetrafluoropyridine **9g**

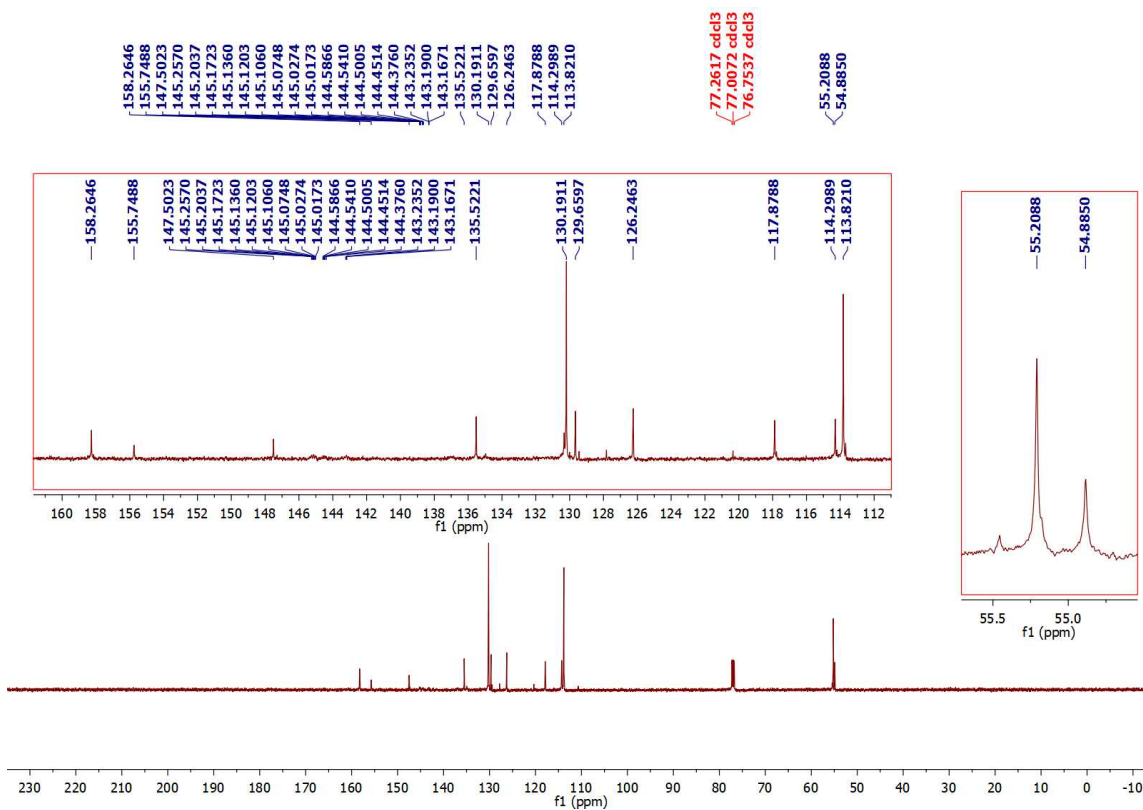

<sup>13</sup>C NMR spectrum of 4-(3-(bis(4-methoxyphenyl)methyl)phenoxy)-2,3,5,6-tetrafluoropyridine **9g**

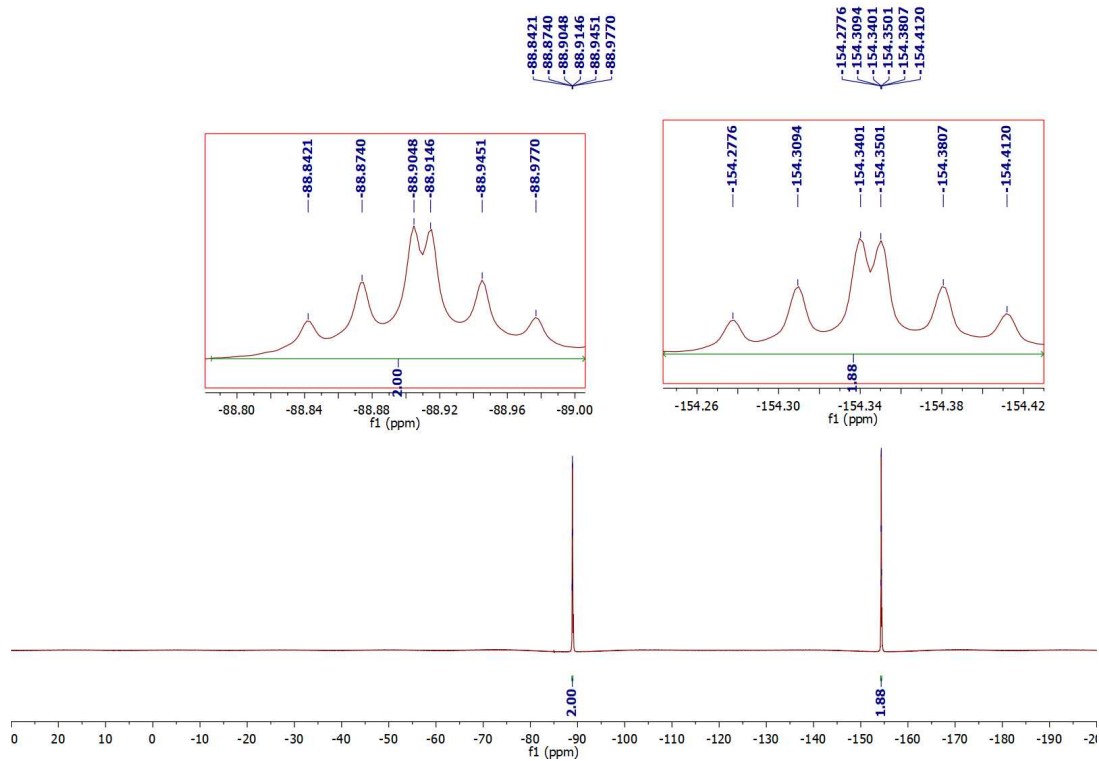

<sup>19</sup>F NMR spectrum of 4-(3-(bis(4-methoxyphenyl)methyl)phenoxy)-2,3,5,6-tetrafluoropyridine **9g**

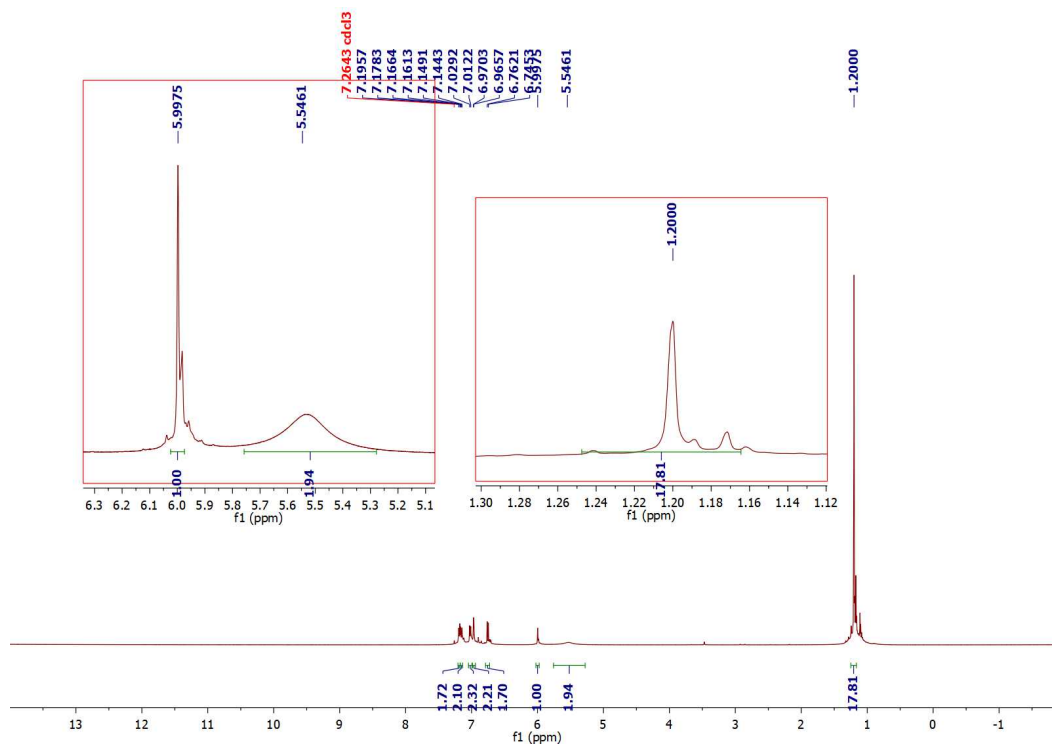

<sup>1</sup>H NMR spectrum of 2,2'-((4-((perfluoropyridin-4-yl)oxy)phenyl)methylene)bis(4-(tert-butyl)phenol) **9h**

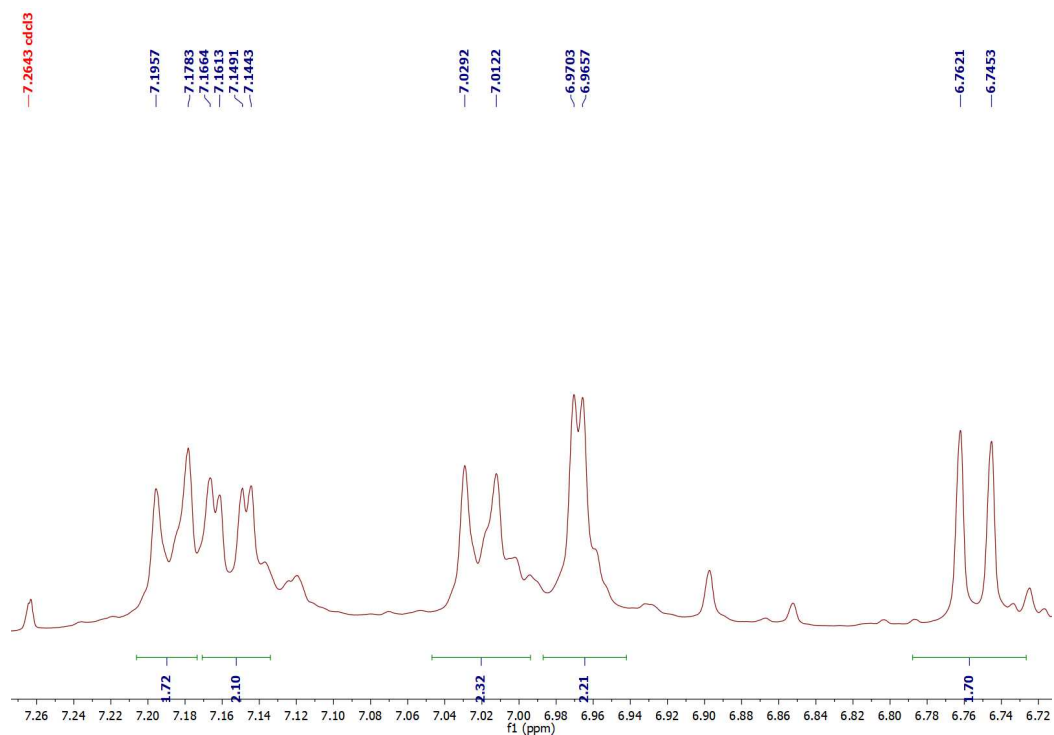

Expanded  $^1\text{H}$  NMR spectrum of 2,2'-((4-((perfluoropyridin-4-yl)oxy)phenyl)methylene)bis(4-(tert-butyl)phenol) **9h**

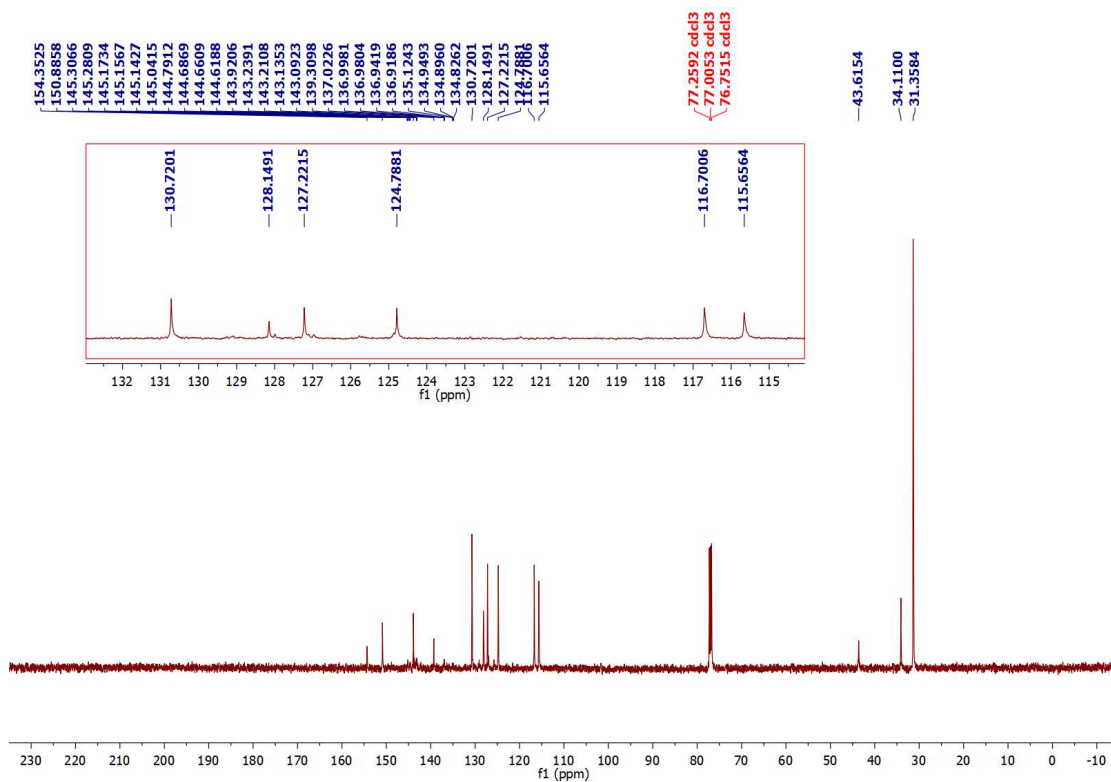

$^{13}\text{C}$  NMR spectrum of 2,2'-((4-((perfluoropyridin-4-yl)oxy)phenyl)methylene)bis(4-(tert-butyl)phenol) **9h**

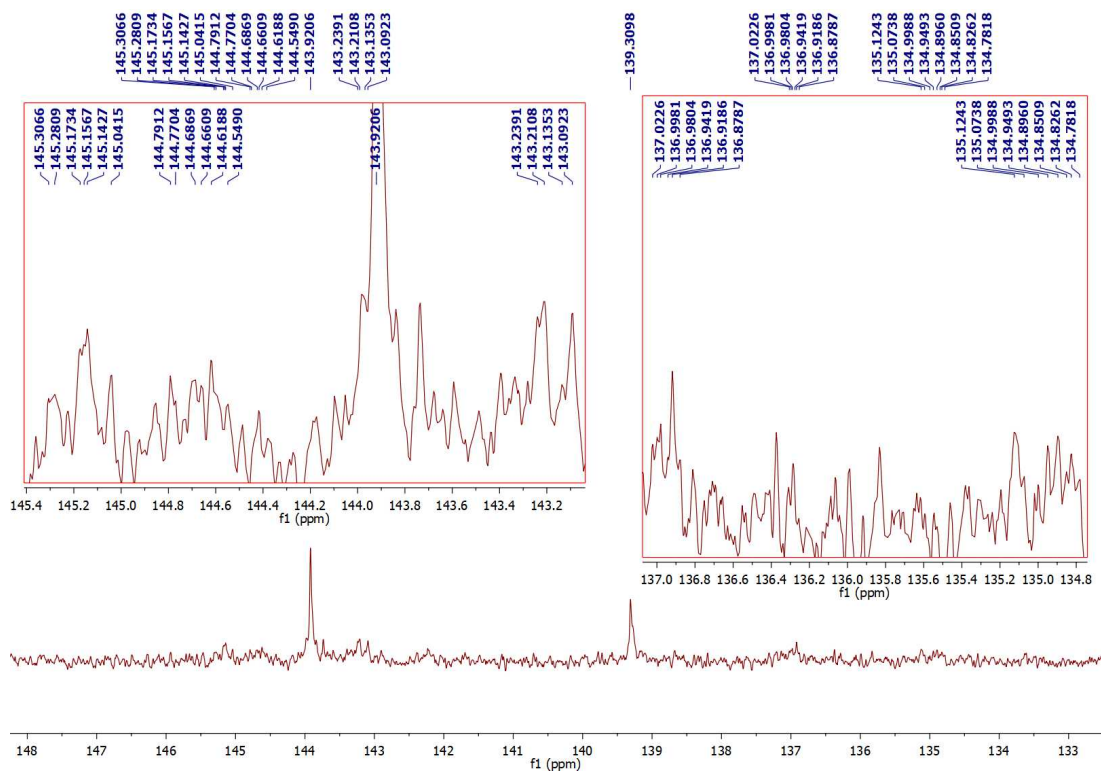

Expanded  $^{13}\text{C}$  NMR spectrum of 2,2'-((4-((perfluoropyridin-4-yl)oxy)phenyl)methylene)bis(4-(tert-butyl)phenol) **9h**

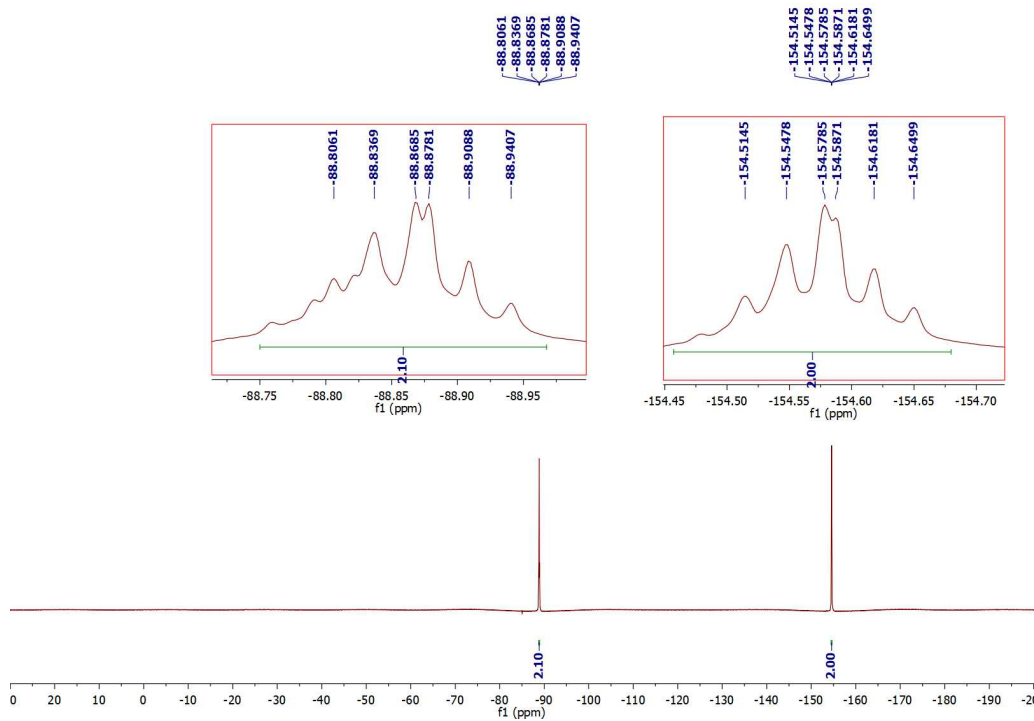

$^{19}\text{F}$  NMR spectrum of 2,2'-((4-((perfluoropyridin-4-yl)oxy)phenyl)methylene)bis(4-(tert-butyl)phenol) **9h**

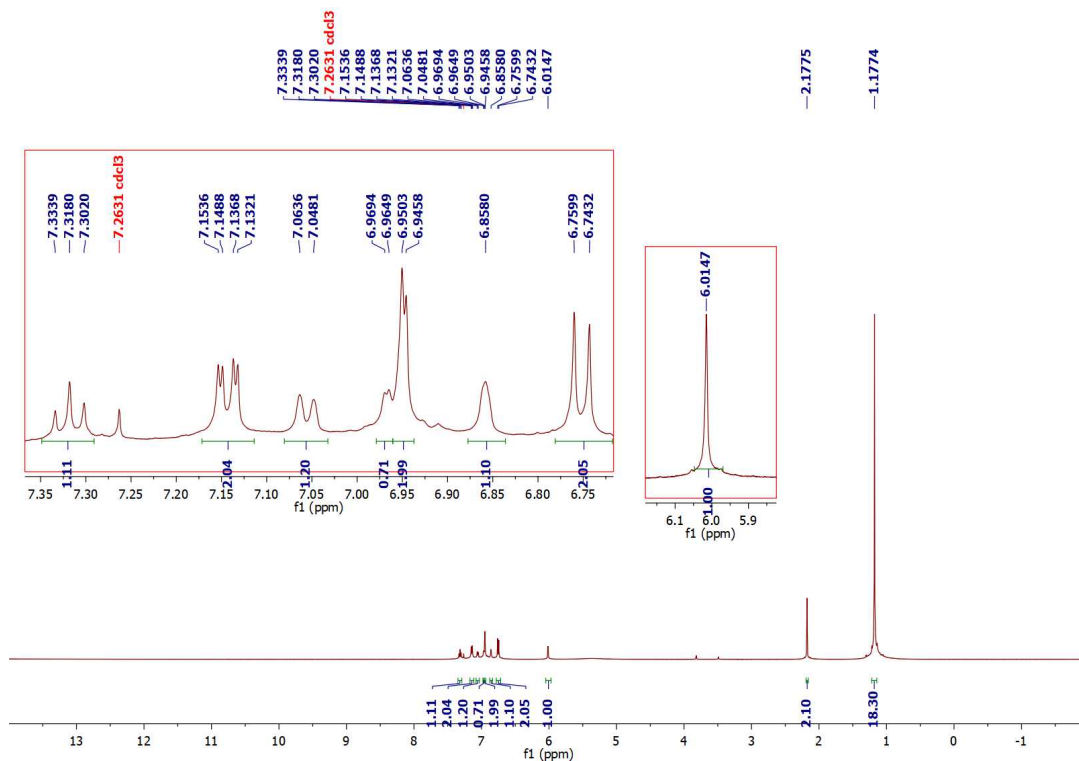

<sup>1</sup>H NMR spectrum of 2,2'-((3-((perfluoropyridin-4-yl)oxy)phenyl)methylene)bis(4-(tert-butyl)phenol) **9i**

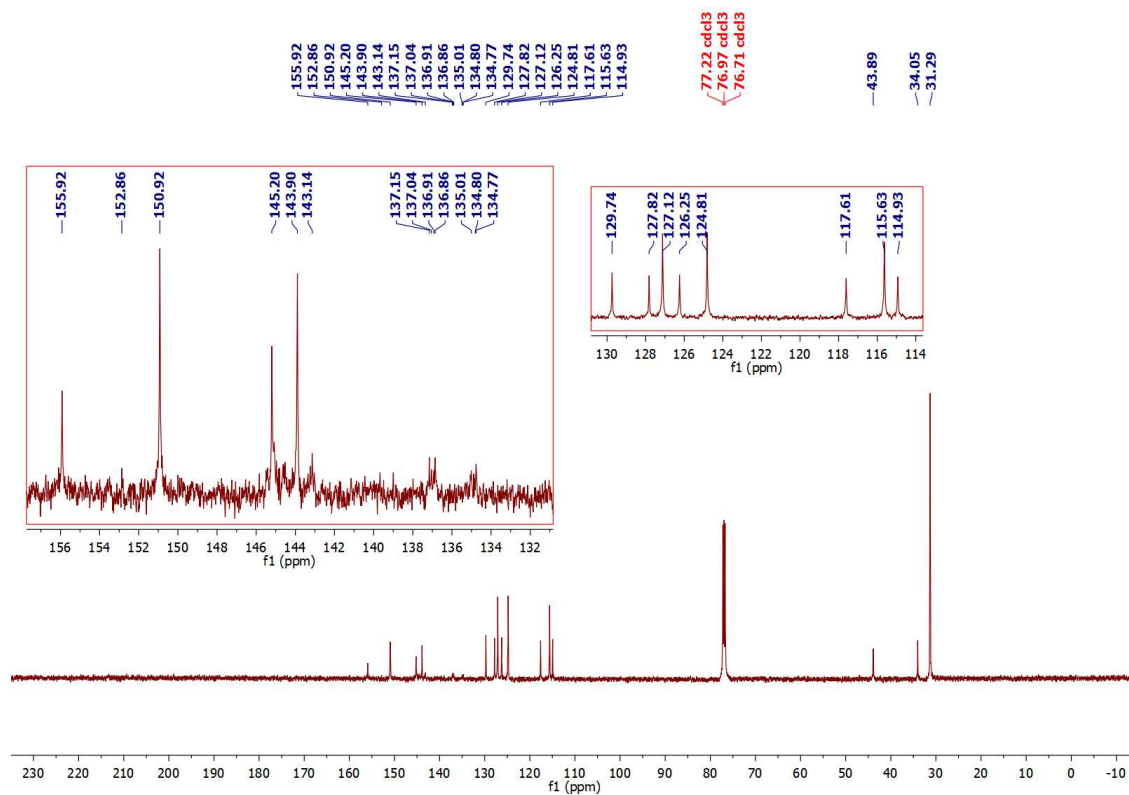

<sup>13</sup>C NMR spectrum of 2,2'-((3-((perfluoropyridin-4-yl)oxy)phenyl)methylene)bis(4-(tert-butyl)phenol) **9i**

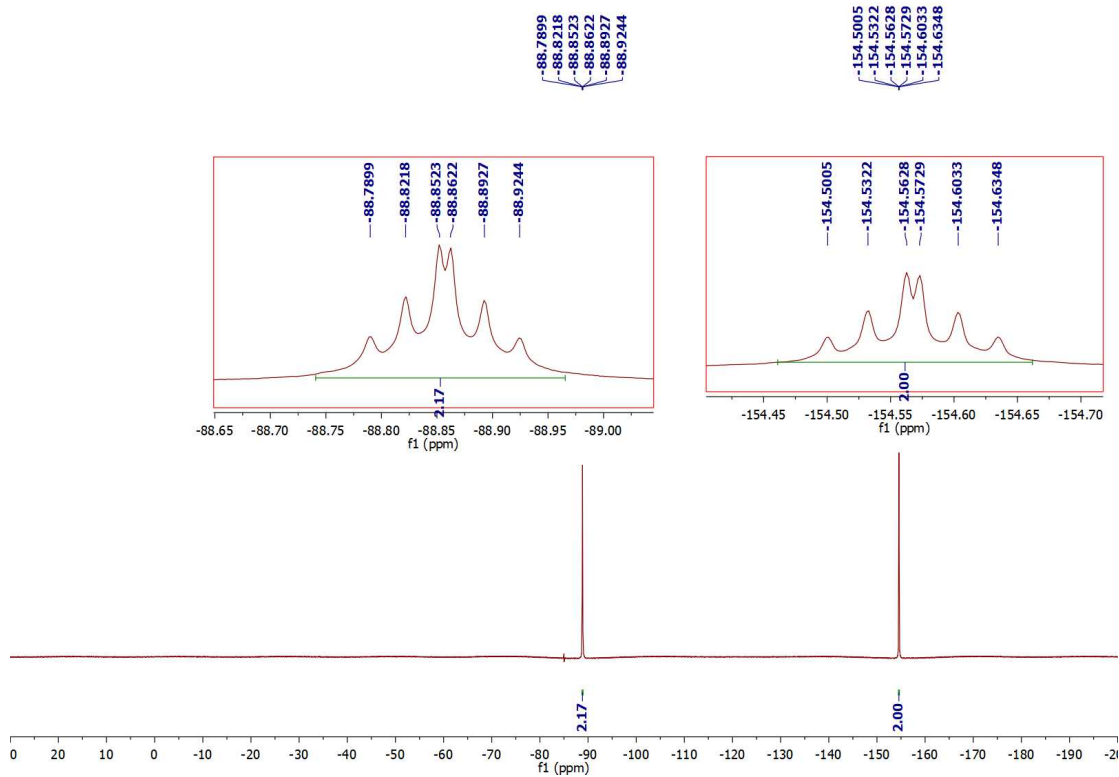

$^{19}\text{F}$  NMR spectrum of 2,2'-((3-((perfluoropyridin-4-yl)oxy)phenyl)methylene)bis(4-(tert-butyl)phenol) **9i**

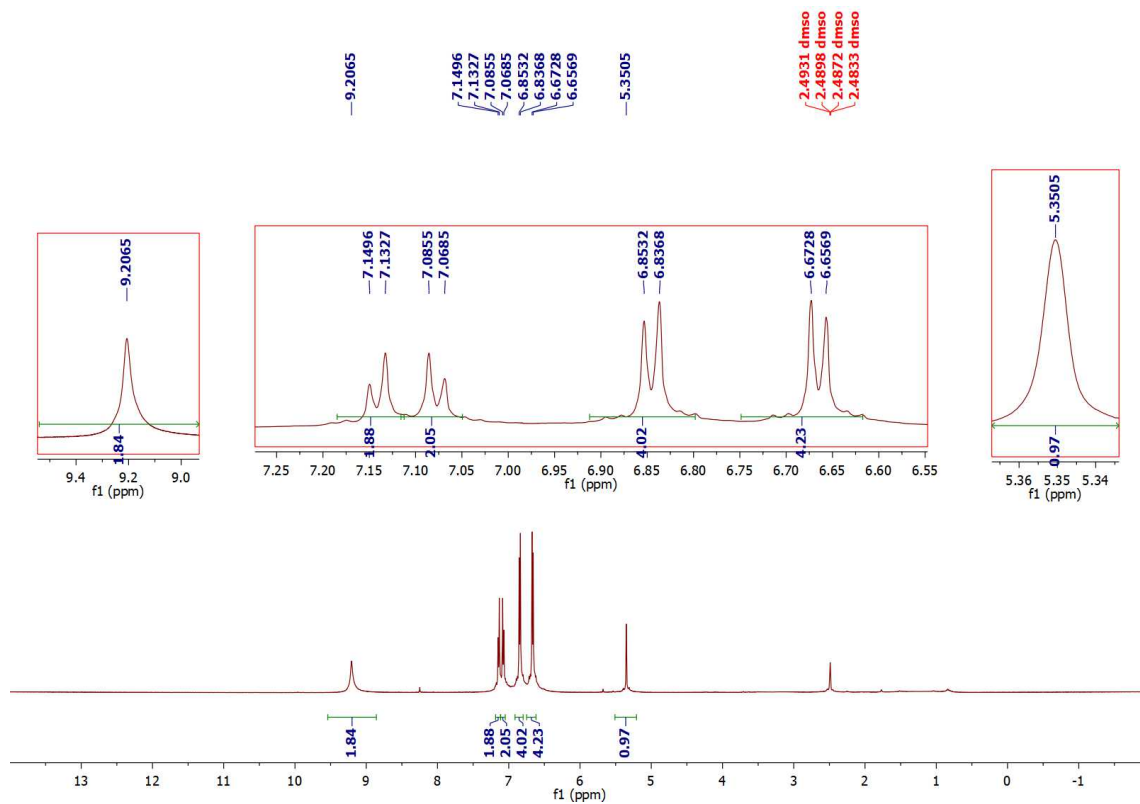

$^1\text{H}$  NMR spectrum of 4,4'-((4-((perfluoropyridin-4-yl)oxy)phenyl)methylene)diphenol **9j**



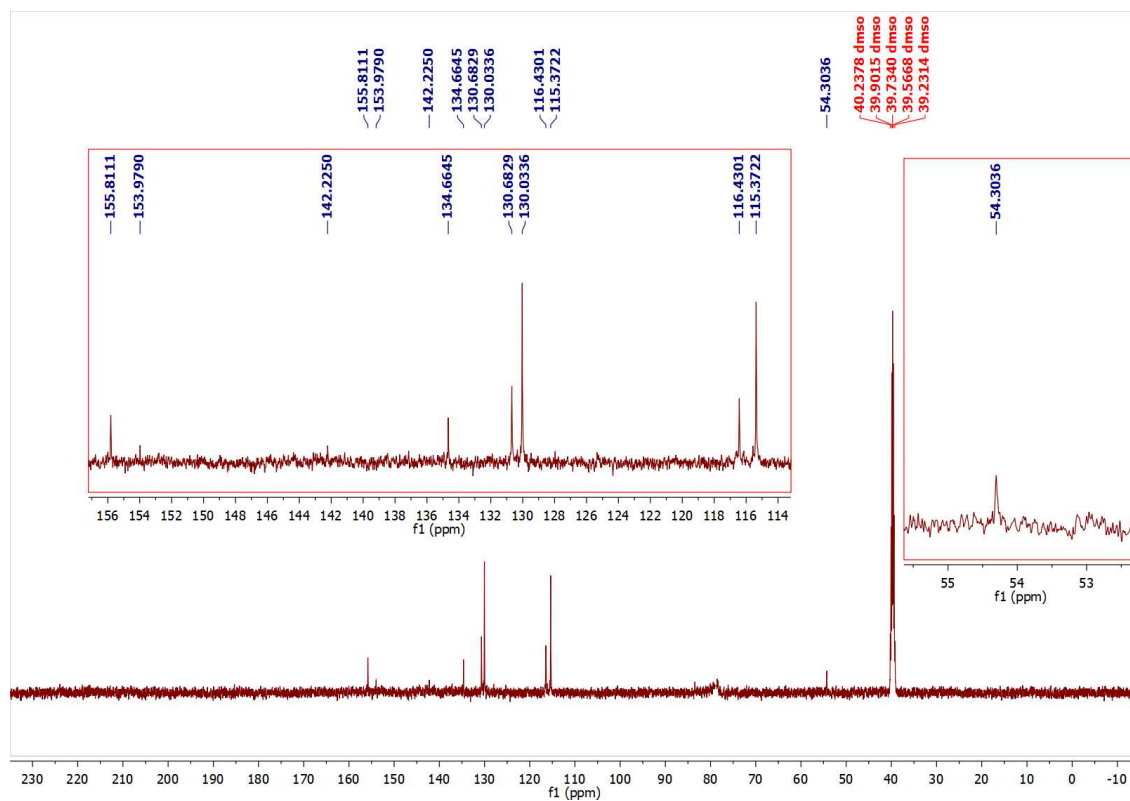

<sup>13</sup>C NMR spectrum of 4,4'-((4-((perfluoropyridin-4-yl)oxy)phenyl)methylene)diphenol **9j**

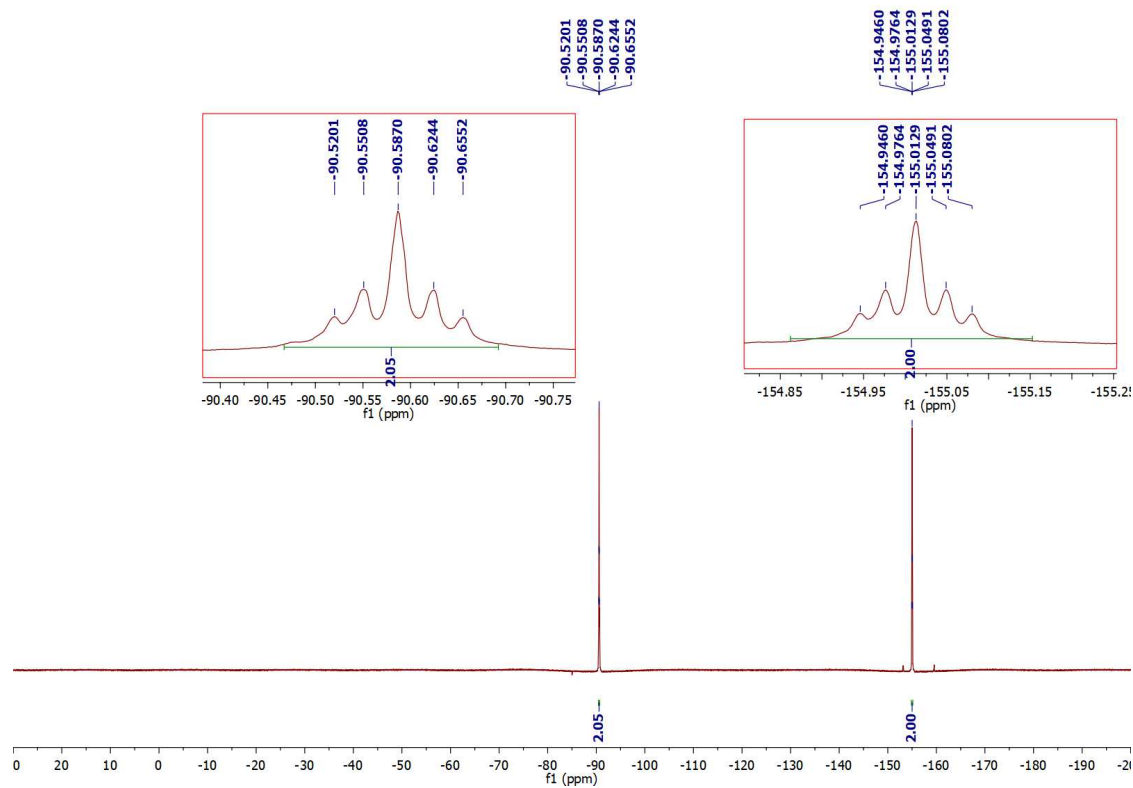

<sup>19</sup>F NMR spectrum of 4,4'-((4-((perfluoropyridin-4-yl)oxy)phenyl)methylene)diphenol **9j**

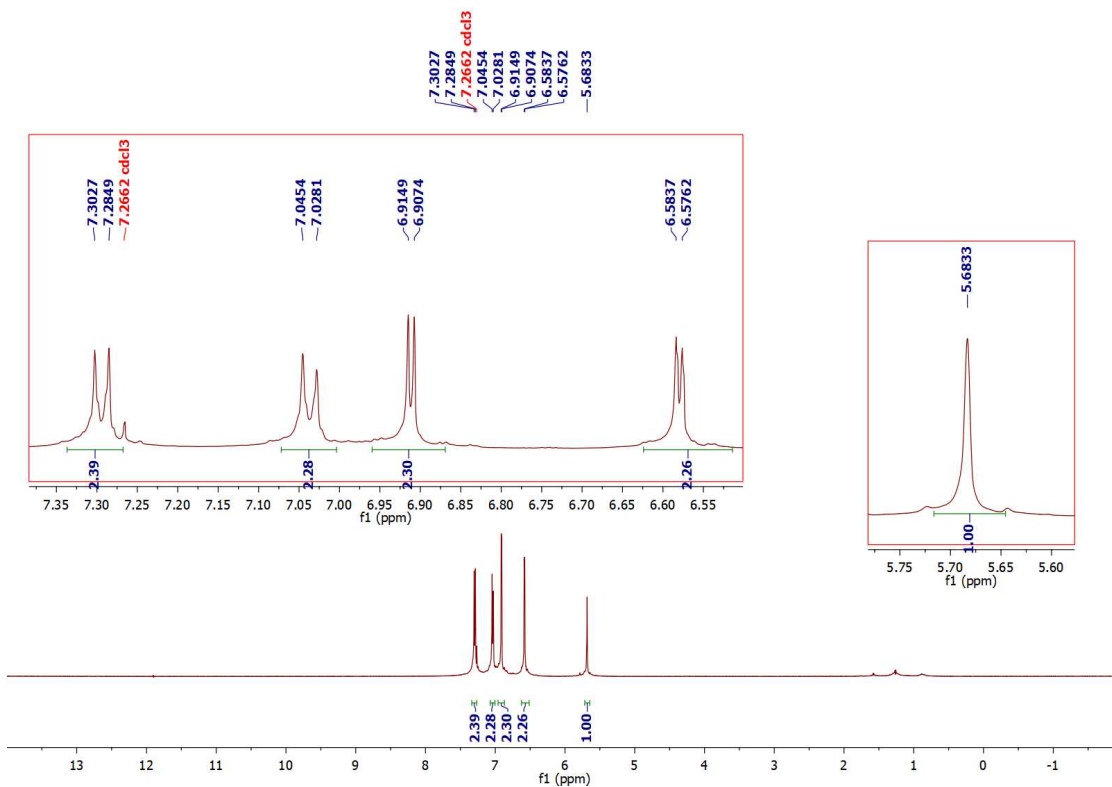

<sup>1</sup>H NMR spectrum of 4-(4-(bis(5-bromothiophen-2-yl)methyl)phenoxy)-2,3,5,6-tetrafluoropyridine **9k**

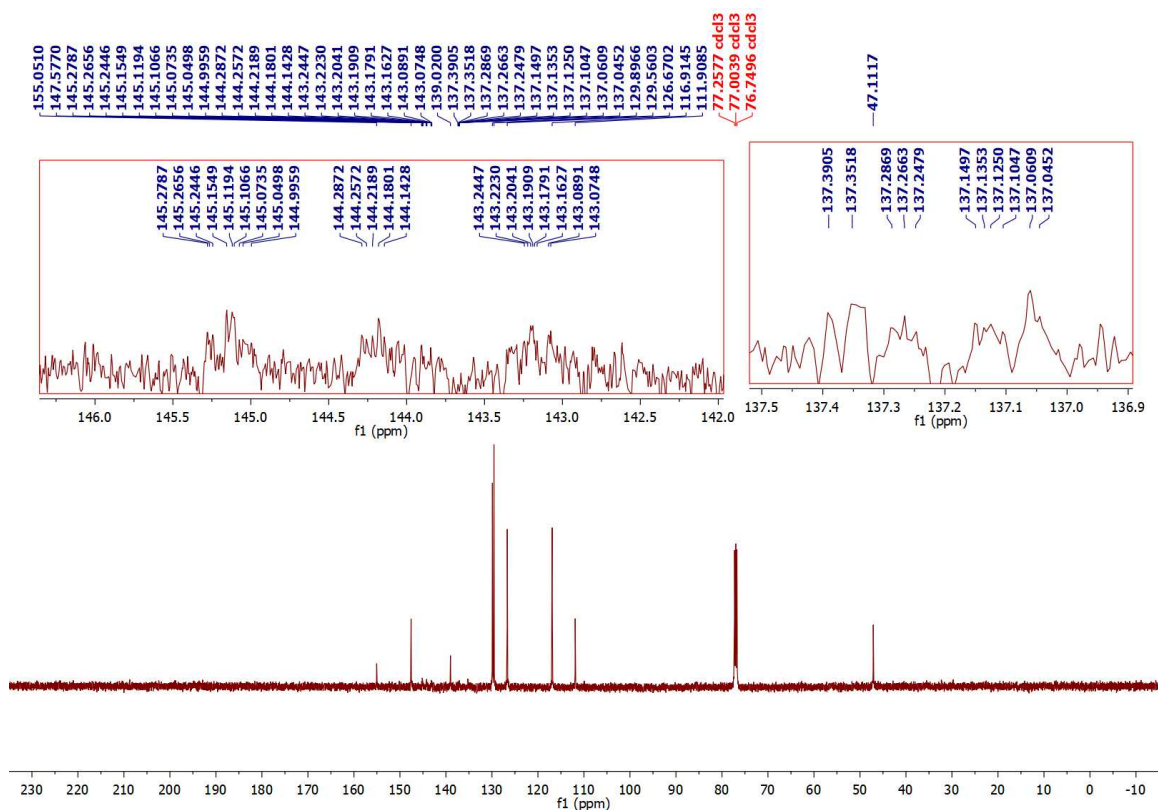

<sup>13</sup>C NMR spectrum of 4-(4-(bis(5-bromothiophen-2-yl)methyl)phenoxy)-2,3,5,6-tetrafluoropyridine **9k**

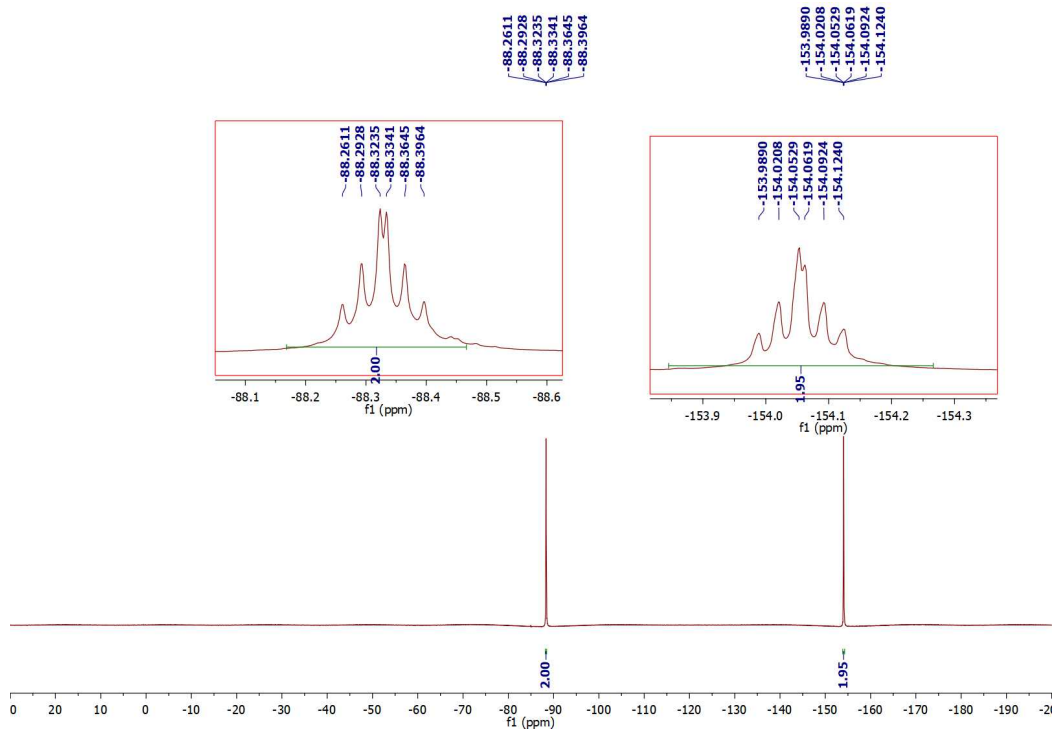

<sup>19</sup>F NMR spectrum of 4-(4-(bis(5-bromothiophen-2-yl)methyl)phenoxy)-2,3,5,6-tetrafluoropyridine **9k**

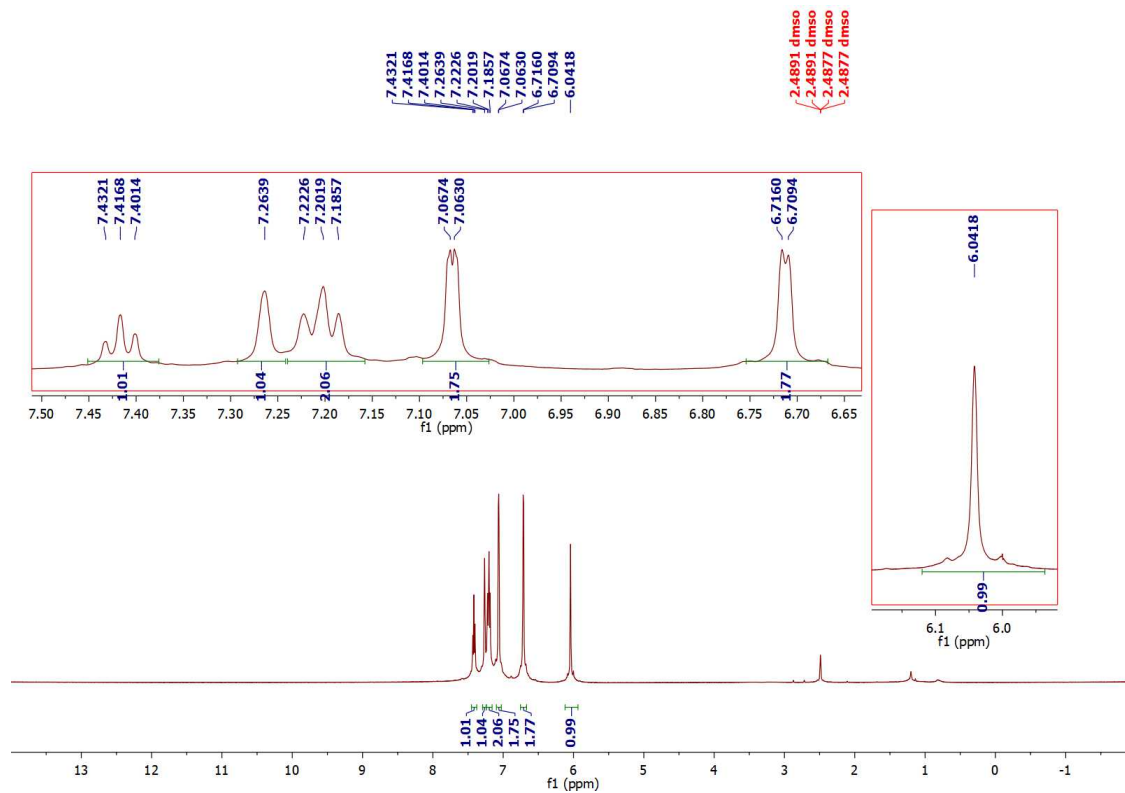

<sup>1</sup>H NMR spectrum of 4-(3-(bis(5-bromothiophen-2-yl)methyl)phenoxy)-2,3,5,6-tetrafluoropyridine **9l**

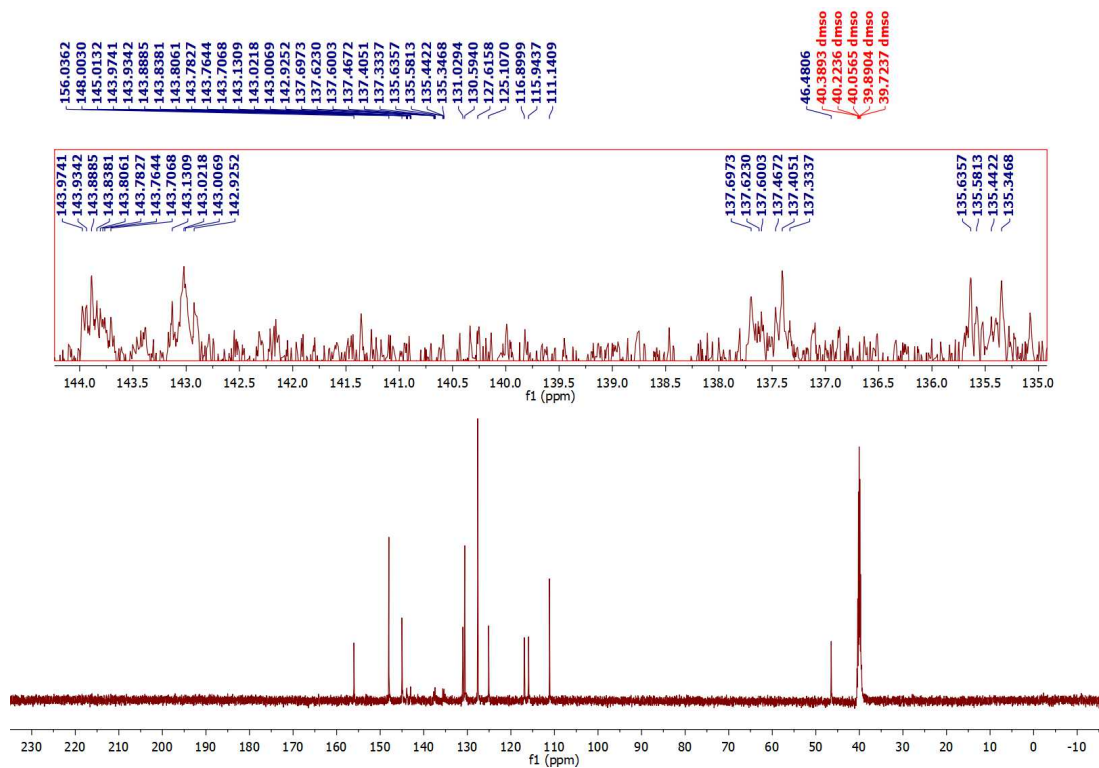

<sup>13</sup>C NMR spectrum of 4-(3-(bis(5-bromothiophen-2-yl)methyl)phenoxy)-2,3,5,6-tetrafluoropyridine **91**

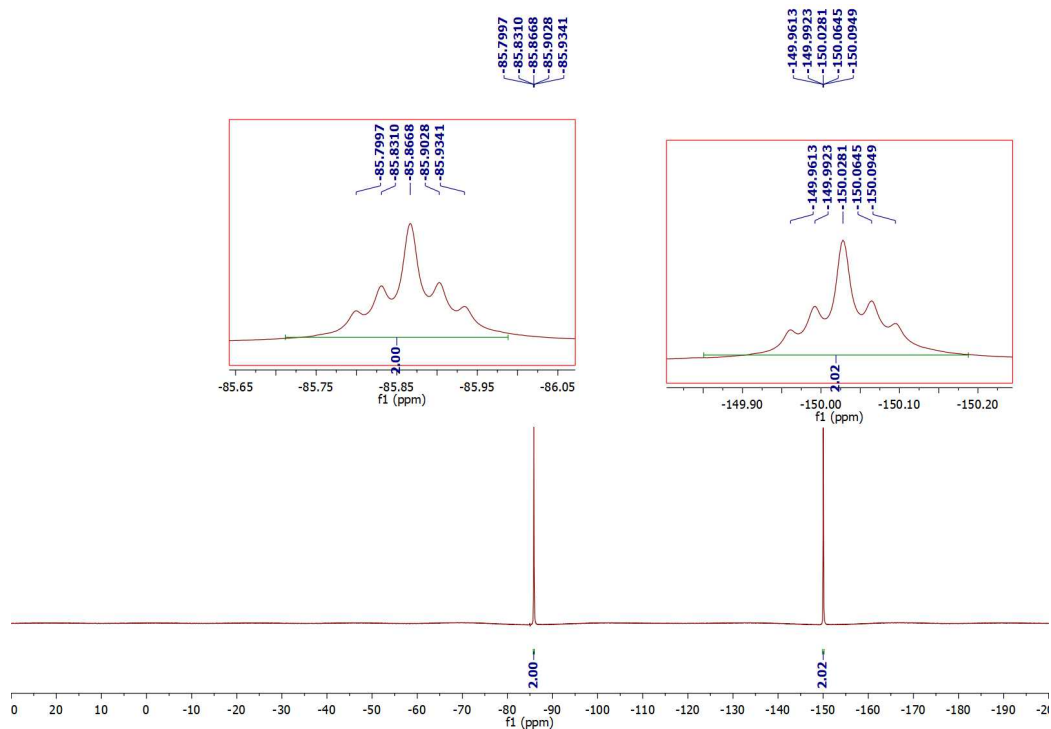

<sup>19</sup>F NMR spectrum of 4-(3-(bis(5-bromothiophen-2-yl)methyl)phenoxy)-2,3,5,6-tetrafluoropyridine **91**

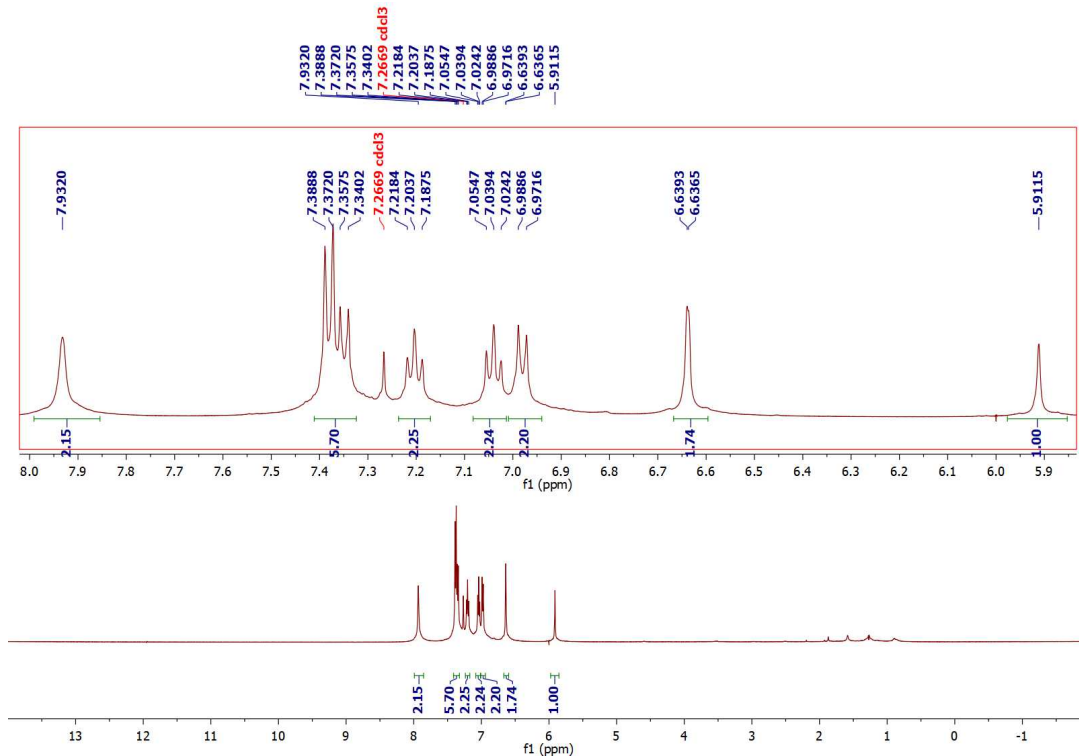

<sup>1</sup>H NMR spectrum of 3,3'-((4-((perfluoropyridin-4-yl)oxy)phenyl)methylene)bis(1H-indole) **9m**

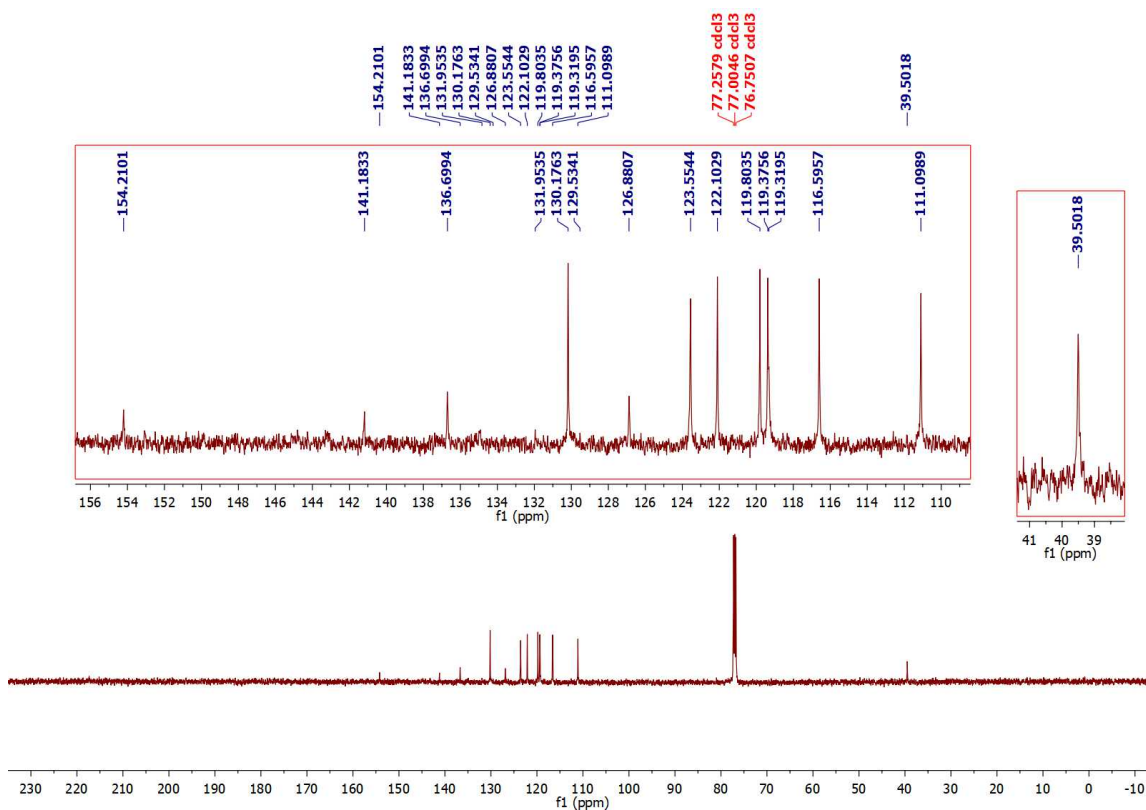

<sup>13</sup>C NMR spectrum of 3,3'-((4-((perfluoropyridin-4-yl)oxy)phenyl)methylene)bis(1H-indole) **9m**

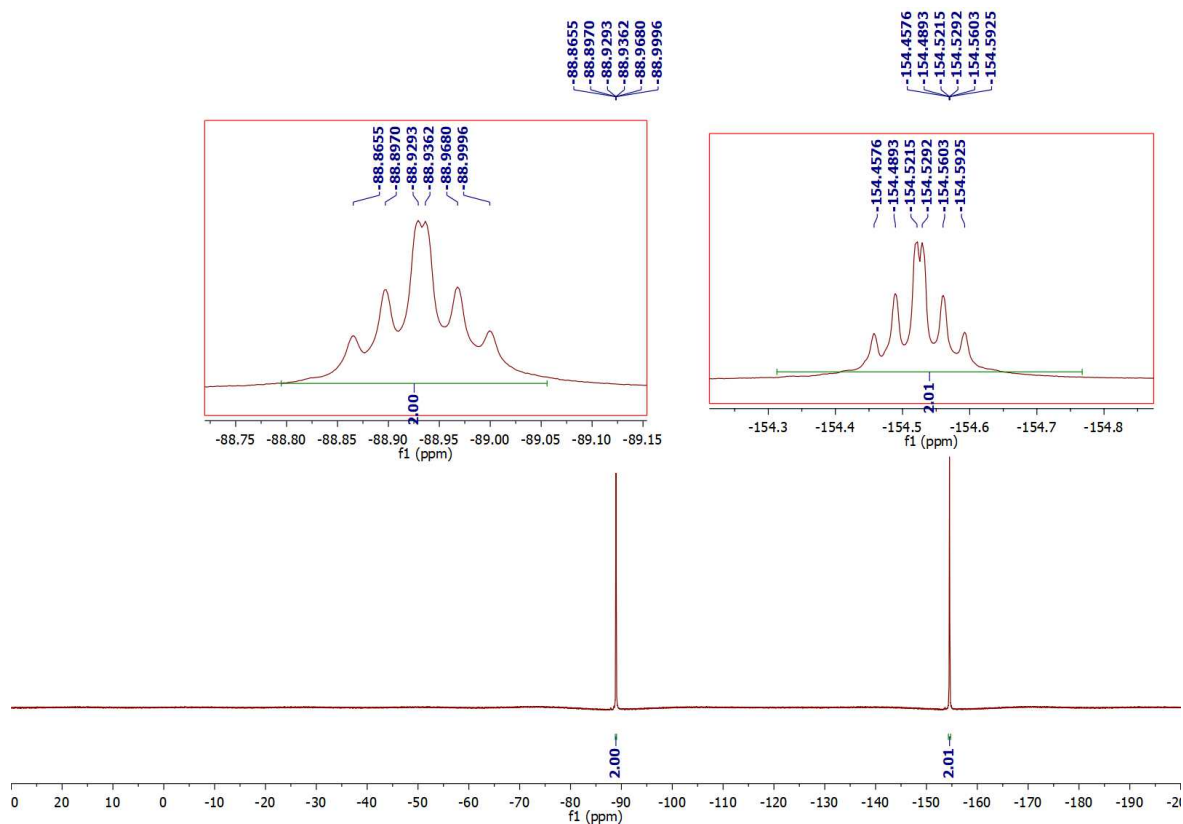

<sup>19</sup>F NMR spectrum of 3,3'-((4-((perfluoropyridin-4-yl)oxy)phenyl)methylene)bis(1H-indole) **9m**

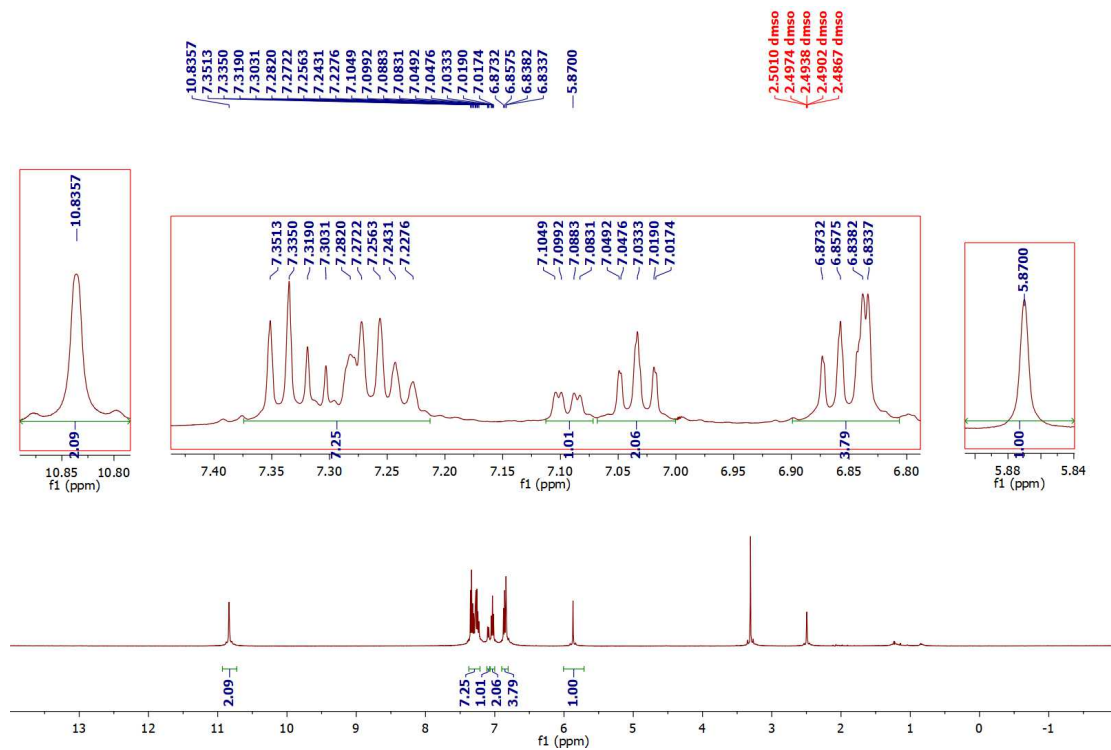

<sup>1</sup>H NMR spectrum of 3,3'-((3-((perfluoropyridin-4-yl)oxy)phenyl)methylene)bis(1H-indole) **9n**

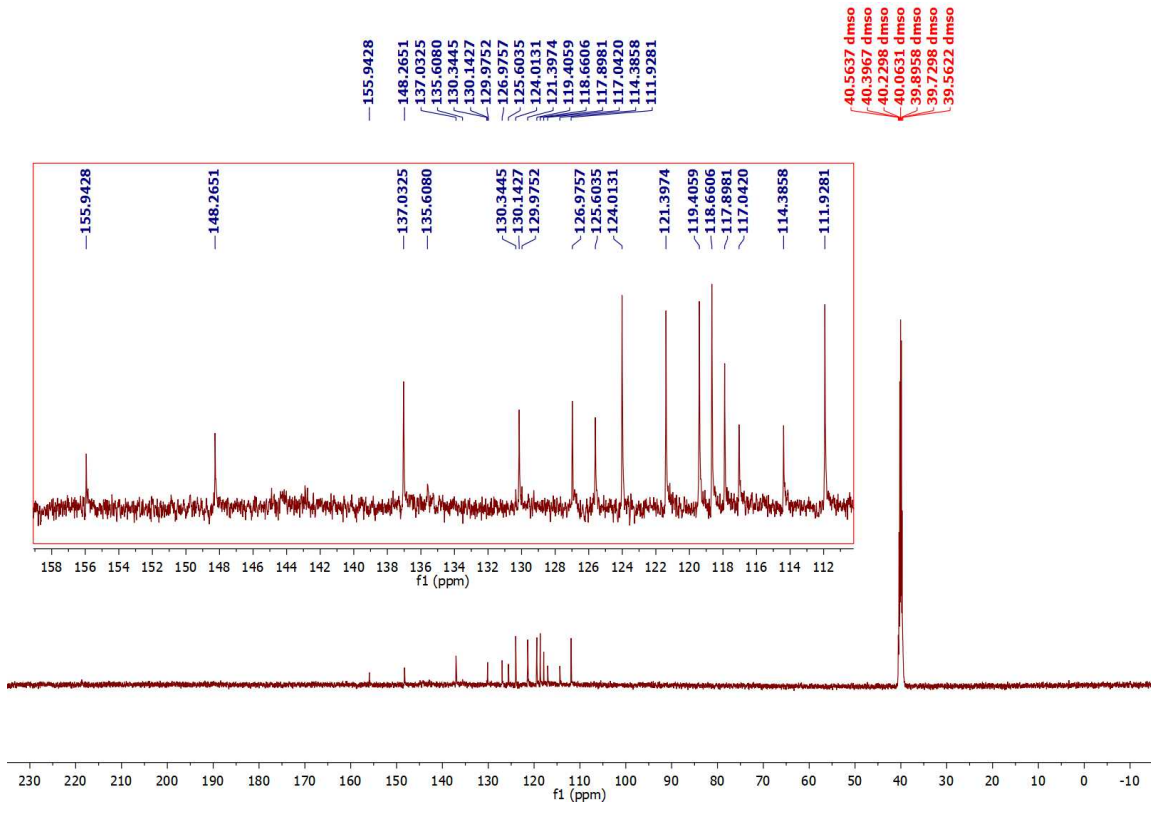

$^{13}\text{C}$  NMR spectrum of 3,3'-((3-((perfluoropyridin-4-yl)oxy)phenyl)methylene)bis(1H-indole) **9n**

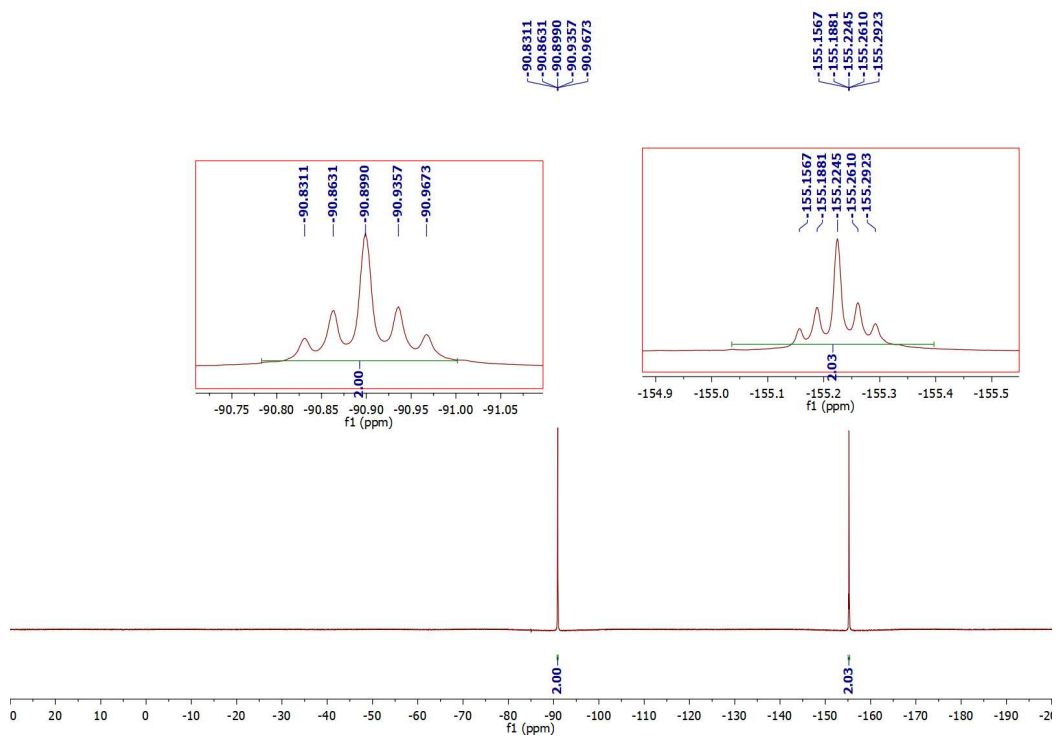

$^{19}\text{F}$  NMR spectrum of 3,3'-((3-((perfluoropyridin-4-yl)oxy)phenyl)methylene)bis(1H-indole) **9n**

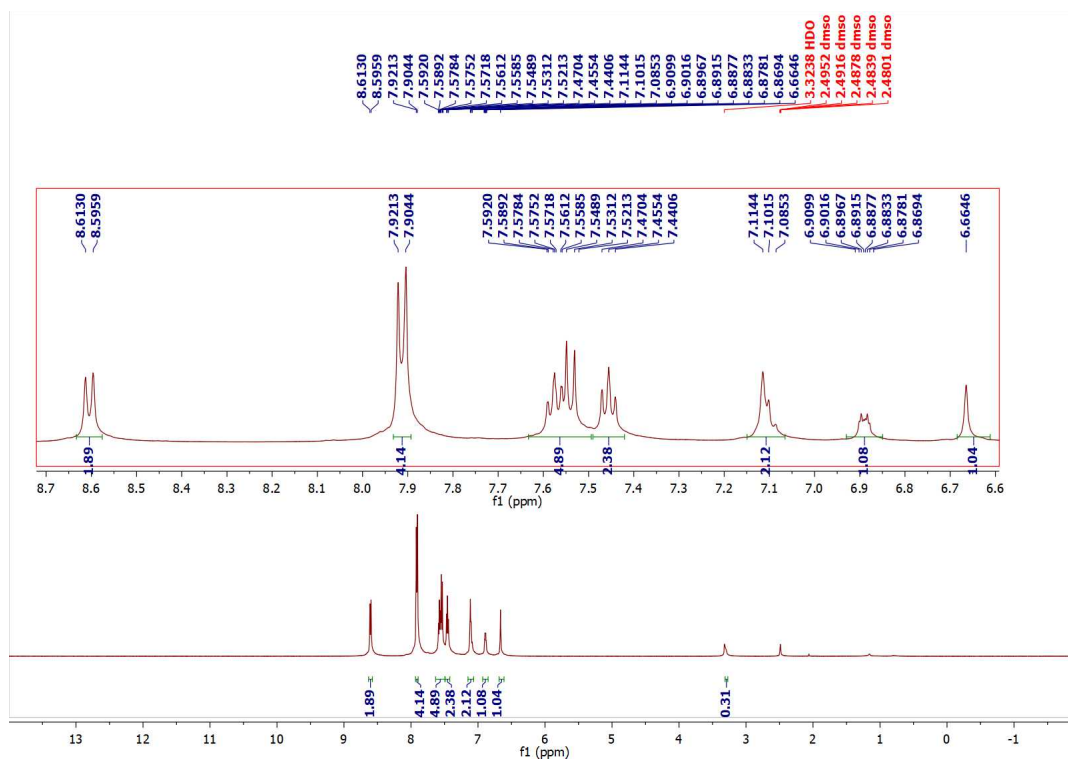

<sup>1</sup>H NMR spectrum of 4-(3-(14H-dibenzo[a,j]xanthen-14-yl)phenoxy)-2,3,5,6-tetrafluoropyridine **9o**

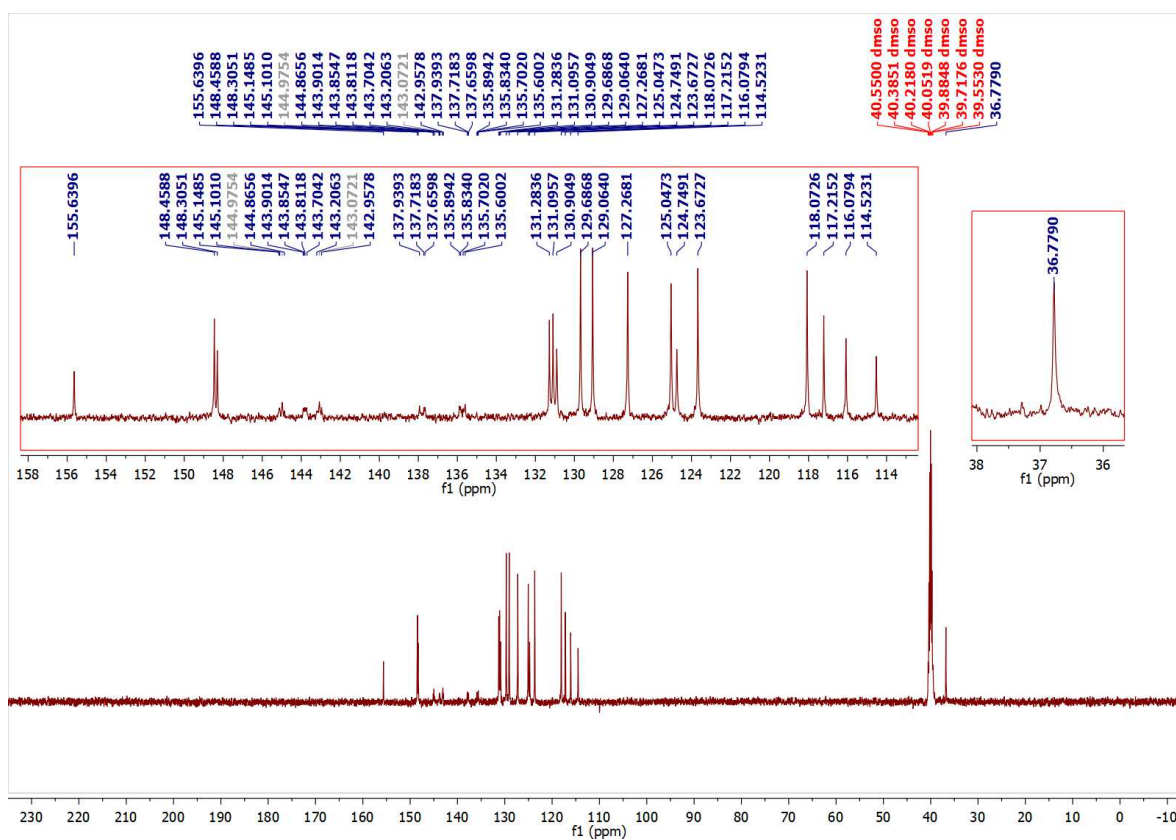

<sup>13</sup>C NMR spectrum of 4-(3-(14H-dibenzo[a,j]xanthen-14-yl)phenoxy)-2,3,5,6-tetrafluoropyridine **9o**



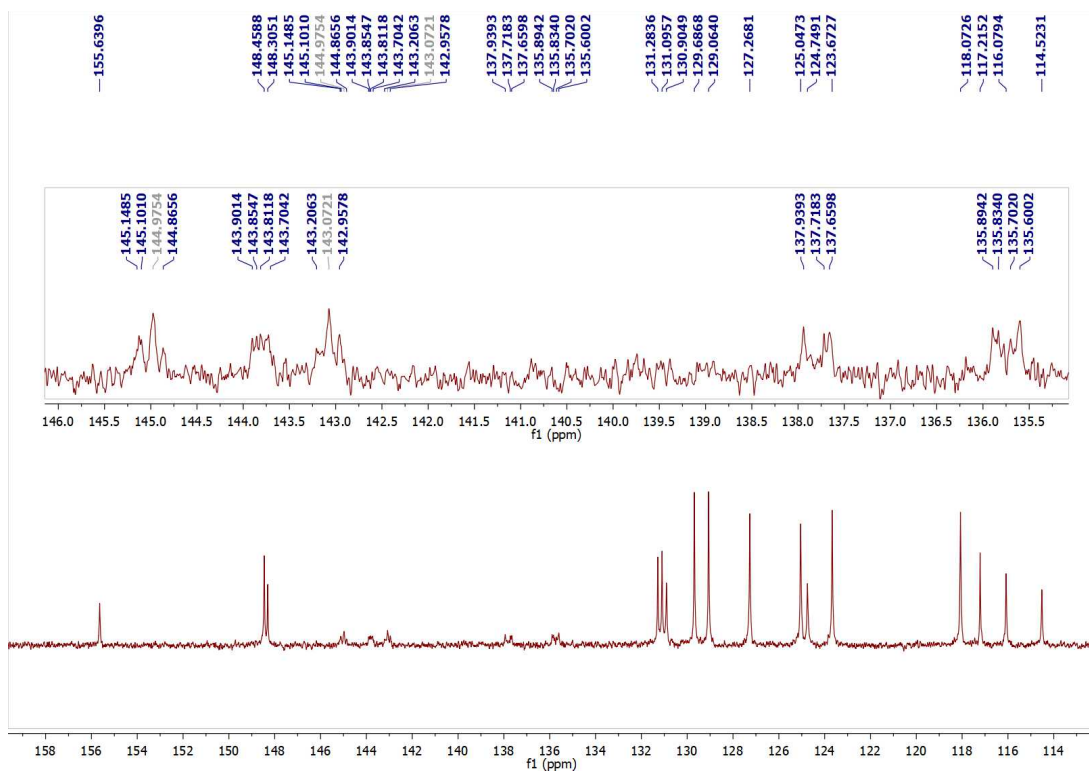

Expanded  $^{13}\text{C}$  NMR spectrum of 4-(3-(14H-dibenzo[a,j]xanthen-14-yl)phenoxy)-2,3,5,6-tetrafluoropyridine **90**

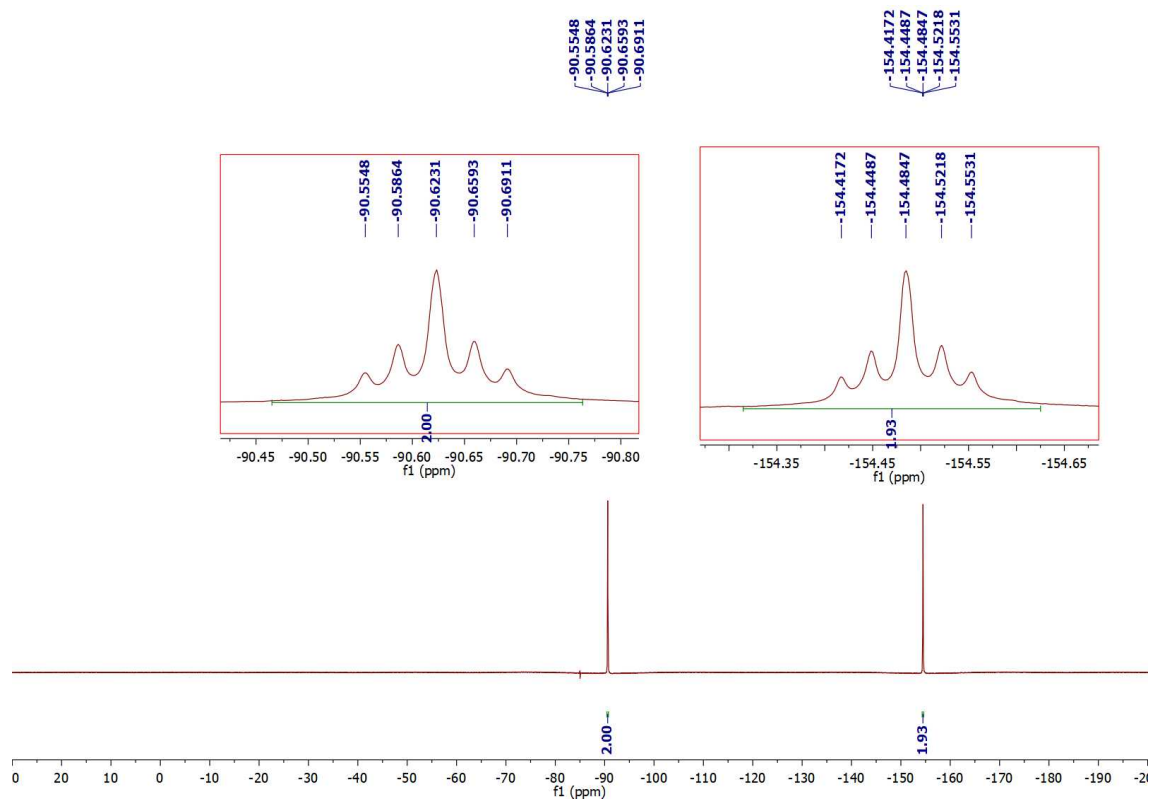

$^{19}\text{F}$  NMR spectrum of 4-(3-(14H-dibenzo[a,j]xanthen-14-yl)phenoxy)-2,3,5,6-tetrafluoropyridine **90**

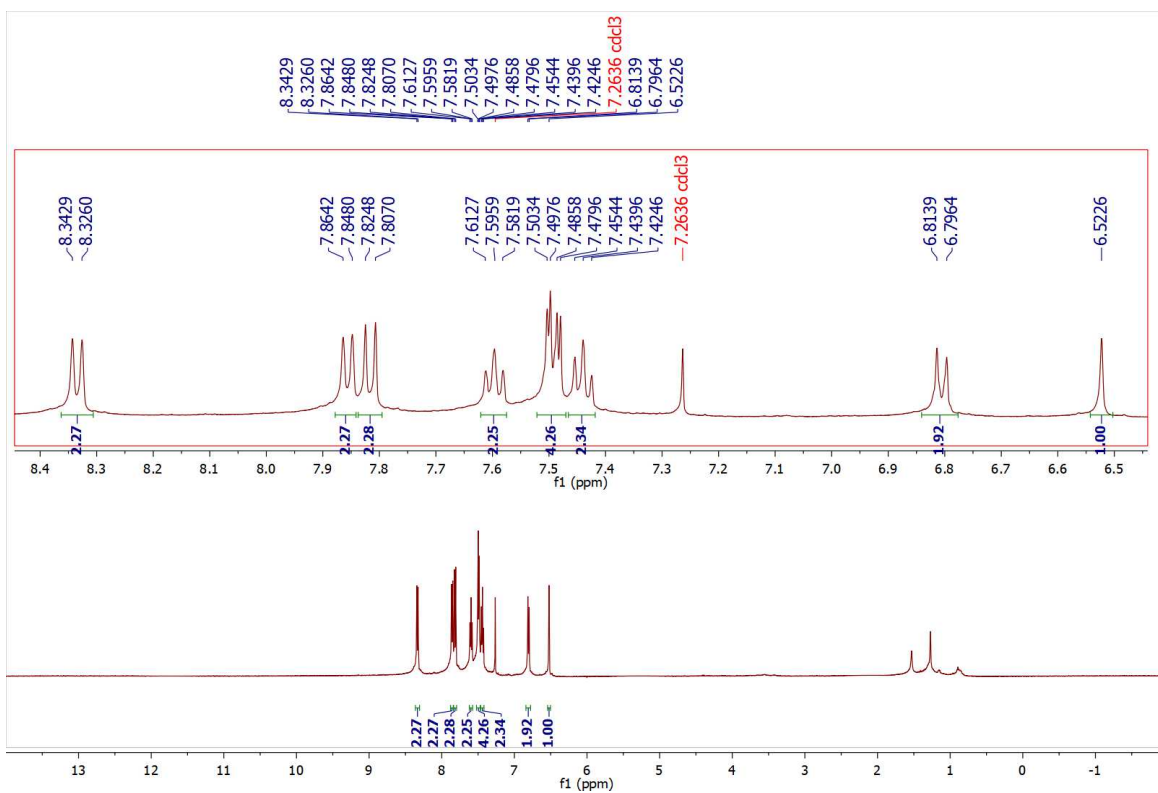

<sup>1</sup>H NMR spectrum of 4-(4-(14H-dibenzo[a,j]xanthen-14-yl)phenoxy)-2,3,5,6-tetrafluoropyridine **9p**

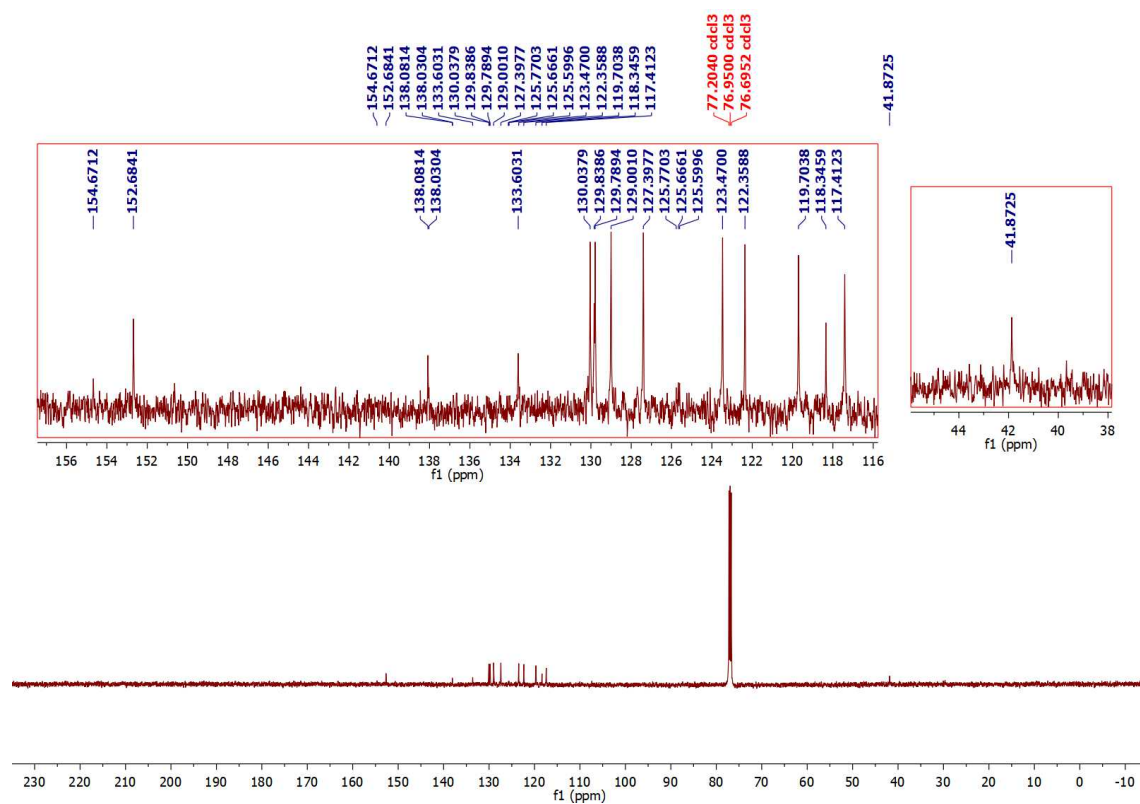

<sup>13</sup>C NMR spectrum of 4-(4-(14H-dibenzo[a,j]xanthen-14-yl)phenoxy)-2,3,5,6-tetrafluoropyridine **9p**

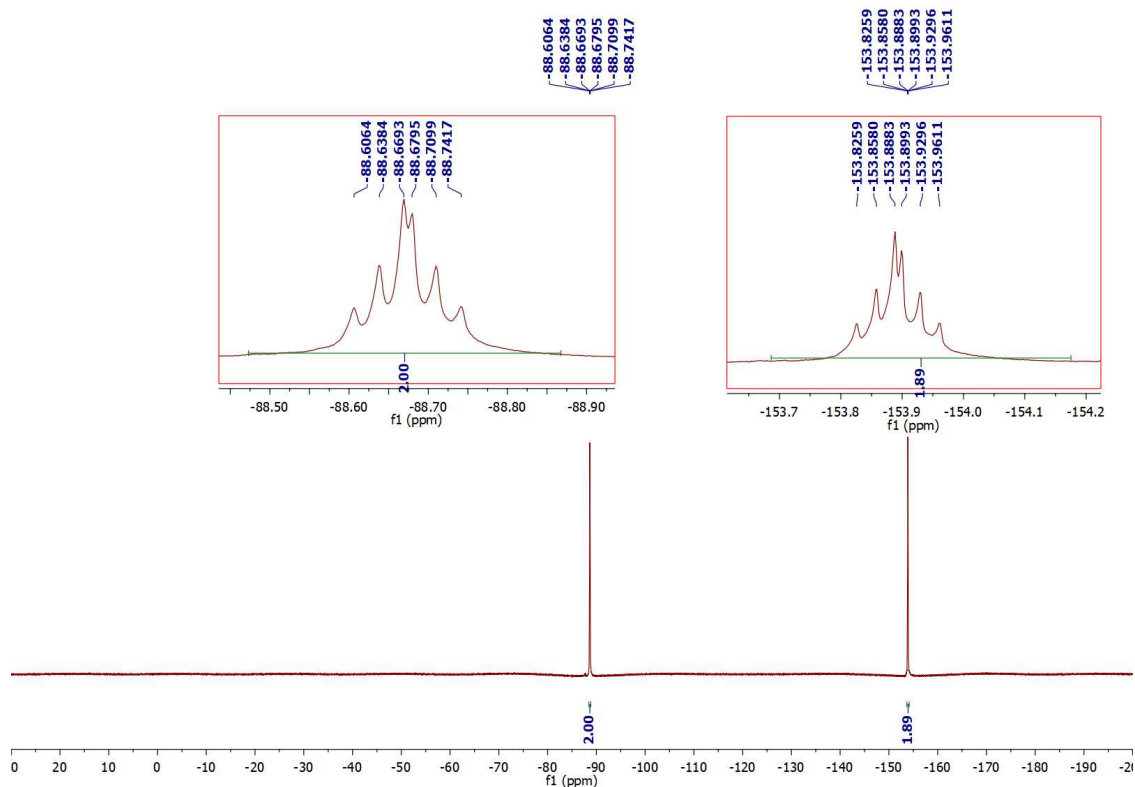

$^{19}\text{F}$  NMR spectrum of 4-(4-(14H-dibenzo[a,j]xanthen-14-yl)phenoxy)-2,3,5,6-tetrafluoropyridine **9p**

## 12. NMR spectra of synthesized bis- and tris-TRAMs containing perfluoropyridine subunits **10 a-g**

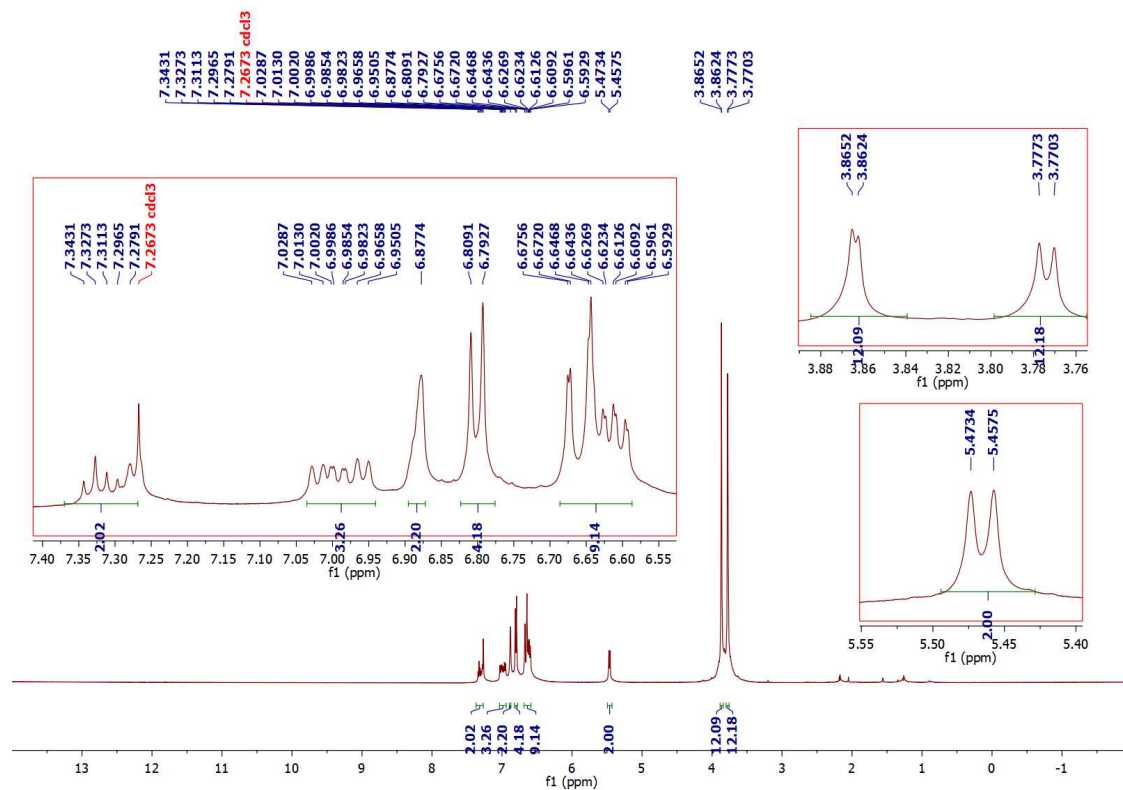

$^1\text{H}$  NMR spectrum of 2,4-Bis(3-(bis(4-methoxyphenyl)methyl)phenoxy)-3,5,6-trifluoropyridine **10a**

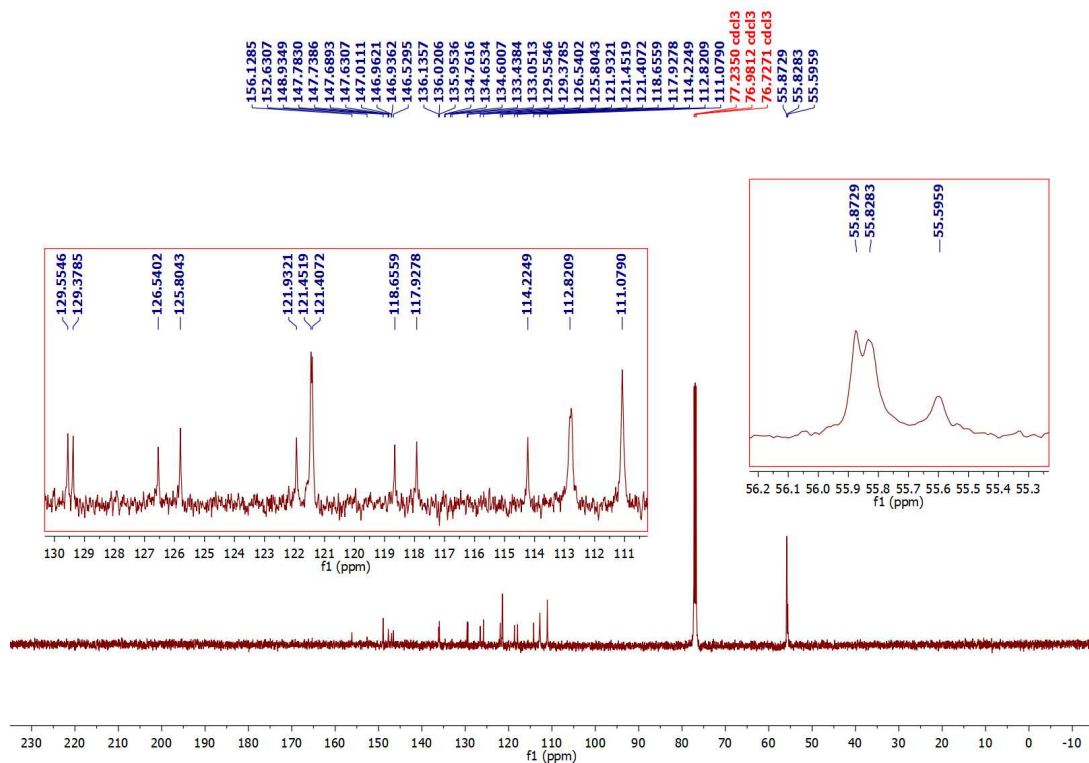

<sup>13</sup>C NMR spectrum of 2,4-Bis(3-(bis(4-methoxyphenyl)methyl)phenoxy)-3,5,6-trifluoropyridine **10a**

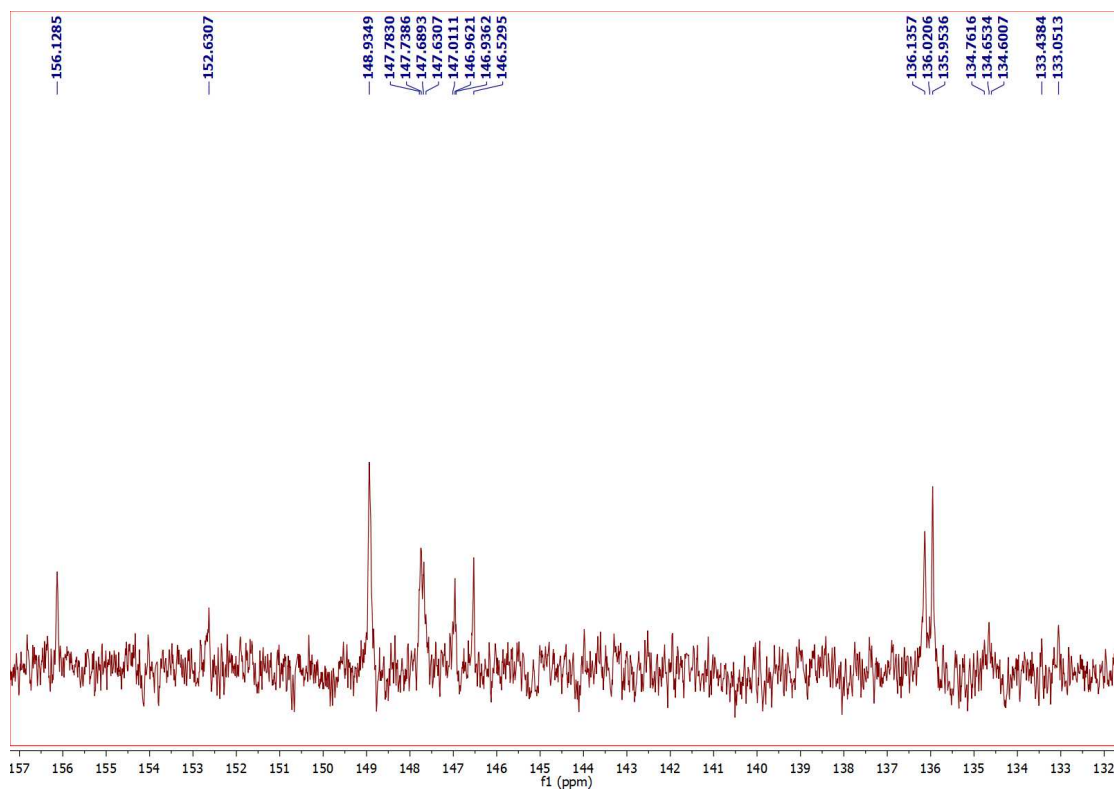

Expanded <sup>13</sup>C NMR spectrum of 2,4-Bis(3-(bis(4-methoxyphenyl)methyl)phenoxy)-3,5,6-trifluoropyridine **10a**

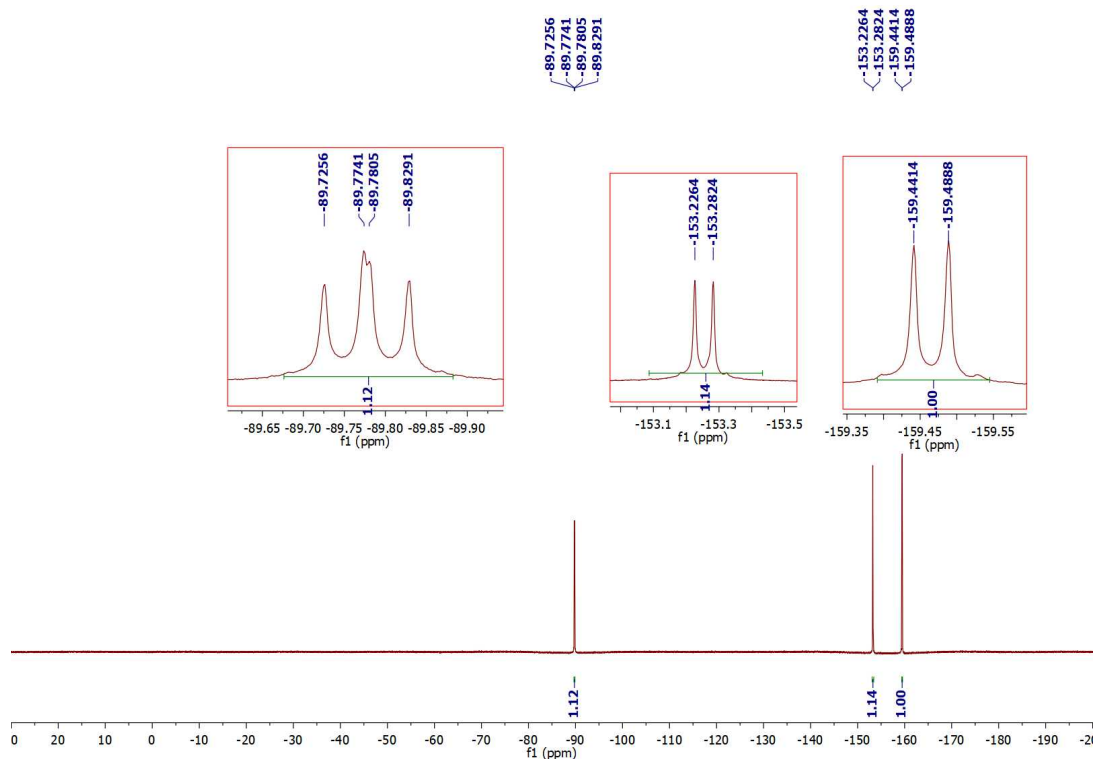

$^{19}\text{F}$  NMR spectrum of 2,4-Bis(3-(bis(4-methoxyphenyl)methyl)phenoxy)-3,5,6-trifluoropyridine **10a**

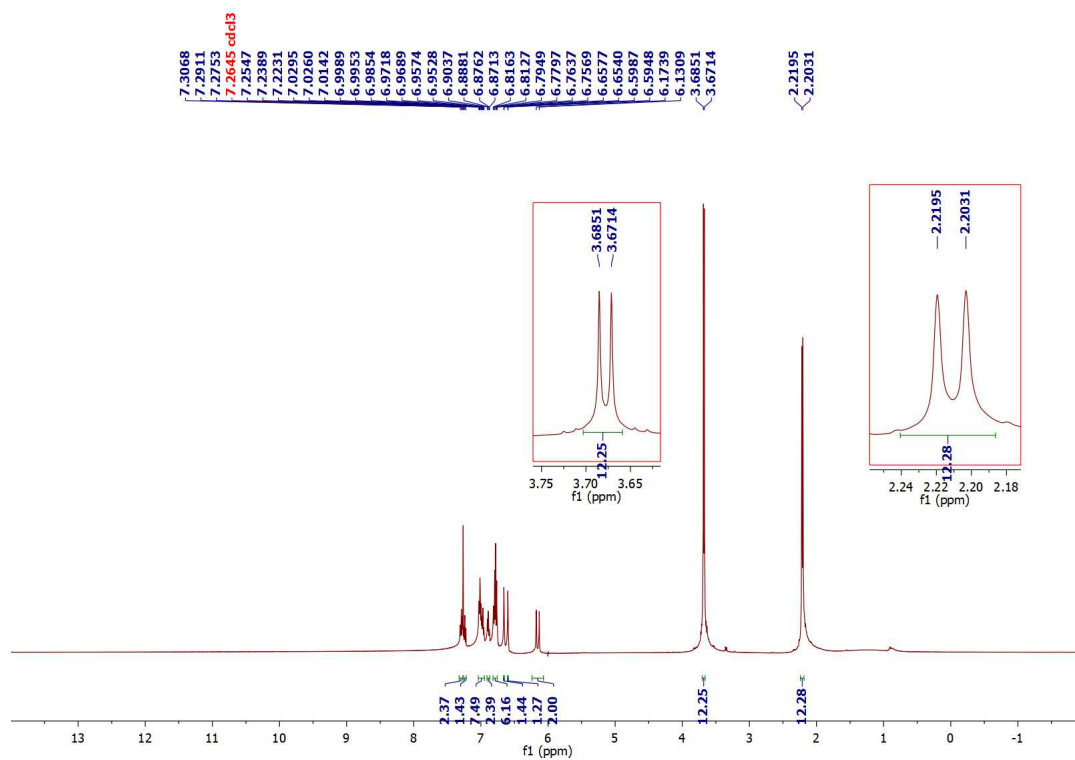

$^1\text{H}$  NMR spectrum of 2,4-Bis(3-(bis(2-methoxy-5-methylphenyl)methyl)phenoxy)-3,5,6-trifluoropyridine **10b**

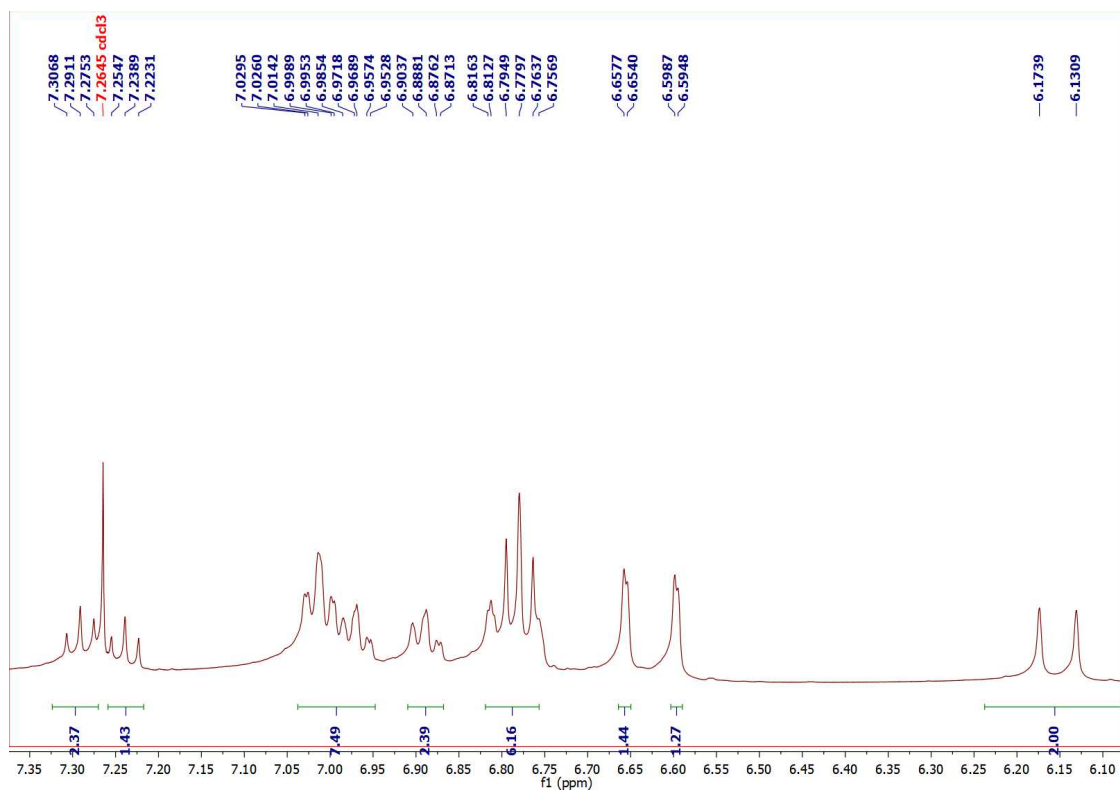

Expanded <sup>1</sup>H NMR spectrum of 2,4-Bis(3-(bis(2-methoxy-5-methylphenyl)methyl)phenoxy)-3,5,6-trifluoropyridine **10b**

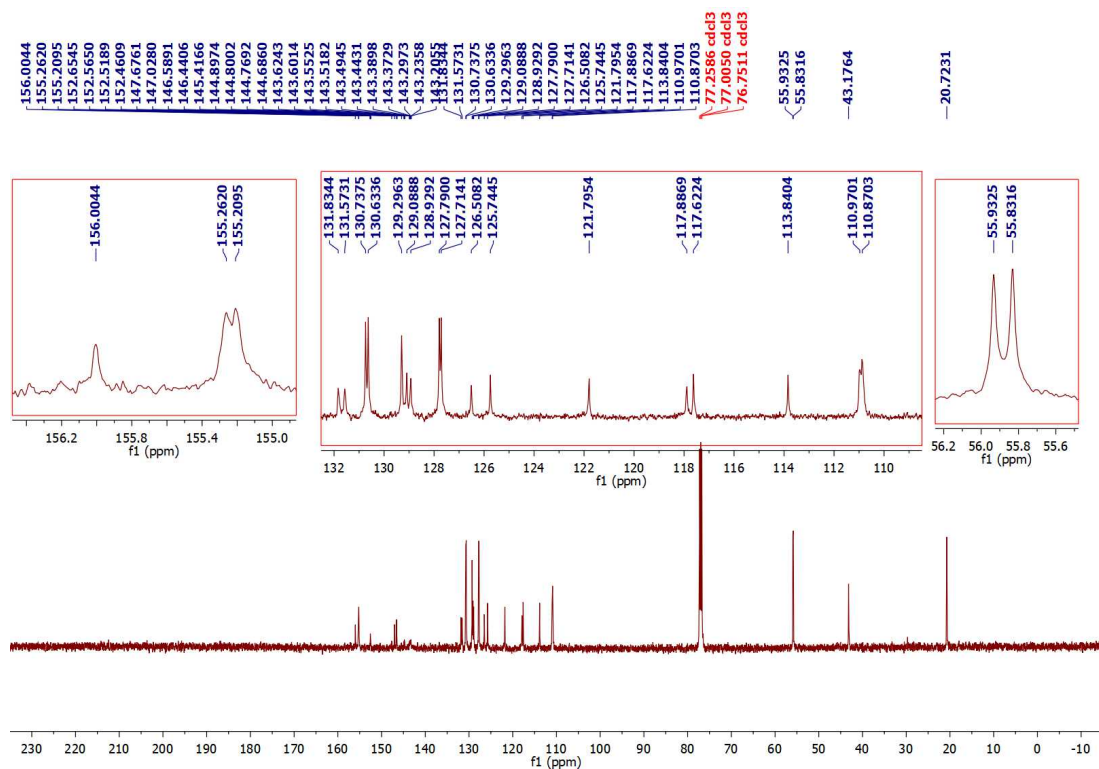

<sup>13</sup>C NMR spectrum of 2,4-Bis(3-(bis(2-methoxy-5-methylphenyl)methyl)phenoxy)-3,5,6-trifluoropyridine **10b**

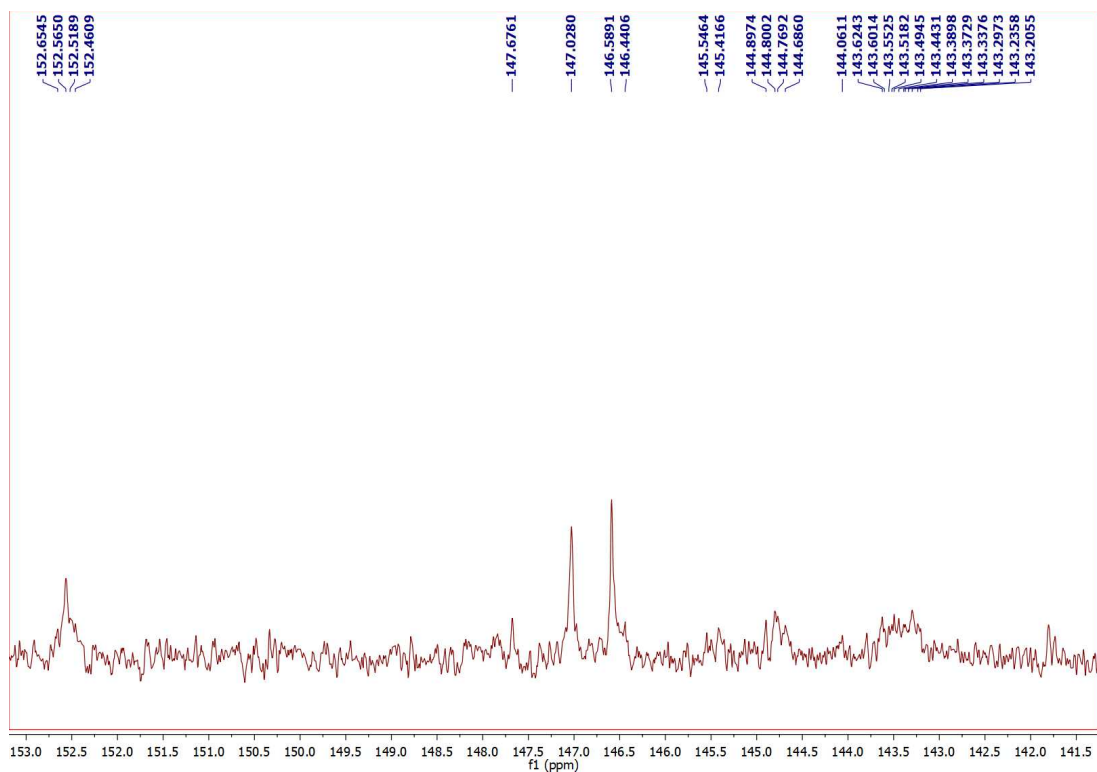

Expanded  $^{13}\text{C}$  NMR spectrum of 2,4-Bis(3-(bis(2-methoxy-5-methylphenyl)methyl)phenoxy)-3,5,6-trifluoropyridine **10b**

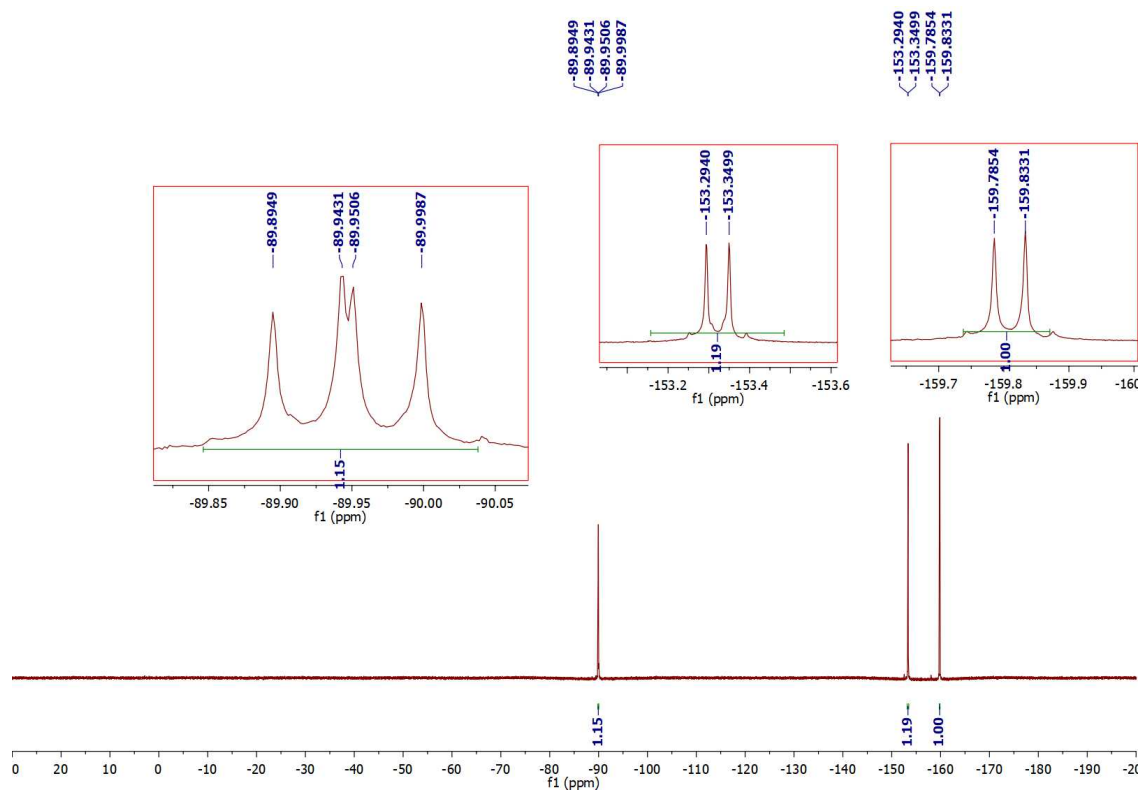

$^{19}\text{F}$  NMR spectrum of 2,4-Bis(3-(bis(2-methoxy-5-methylphenyl)methyl)phenoxy)-3,5,6-trifluoropyridine **10b**

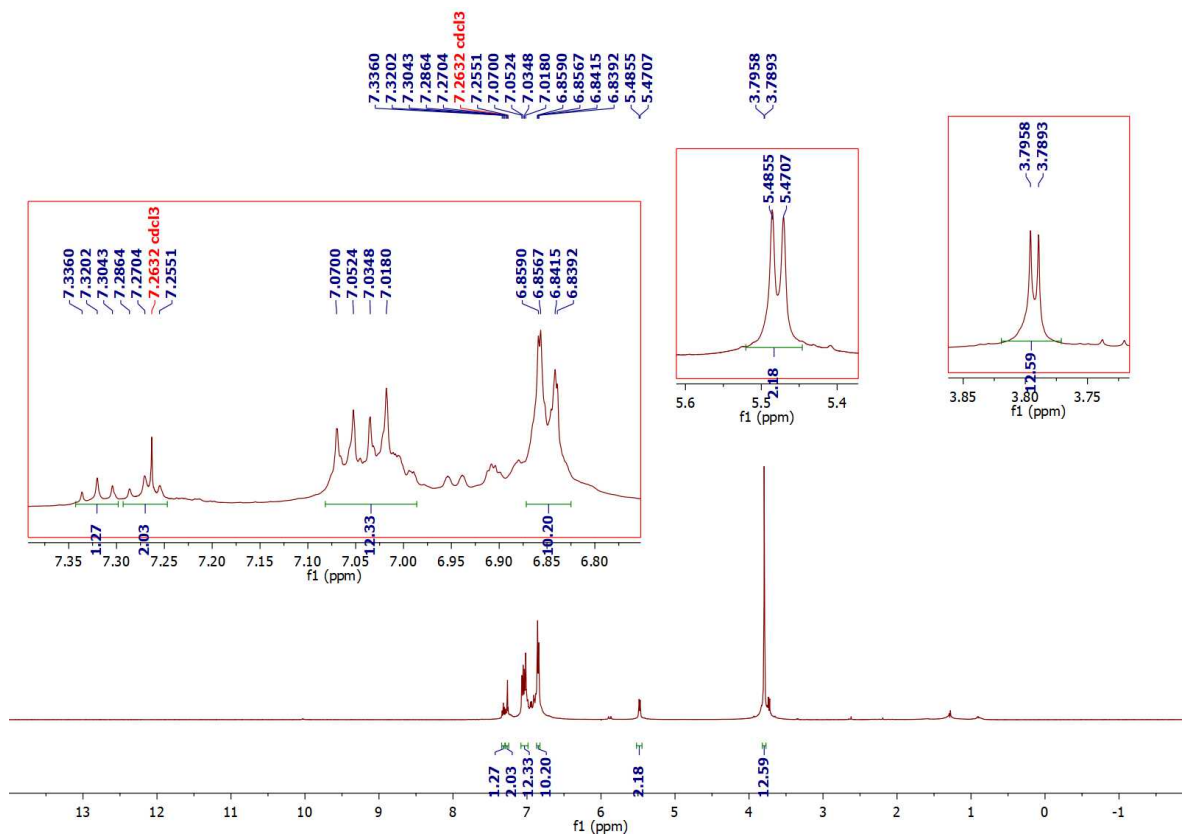

<sup>1</sup>H NMR spectrum of 2,4-Bis(3-(bis(4-methoxyphenyl)methyl)phenoxy)-3,5,6-trifluoropyridine **10c**

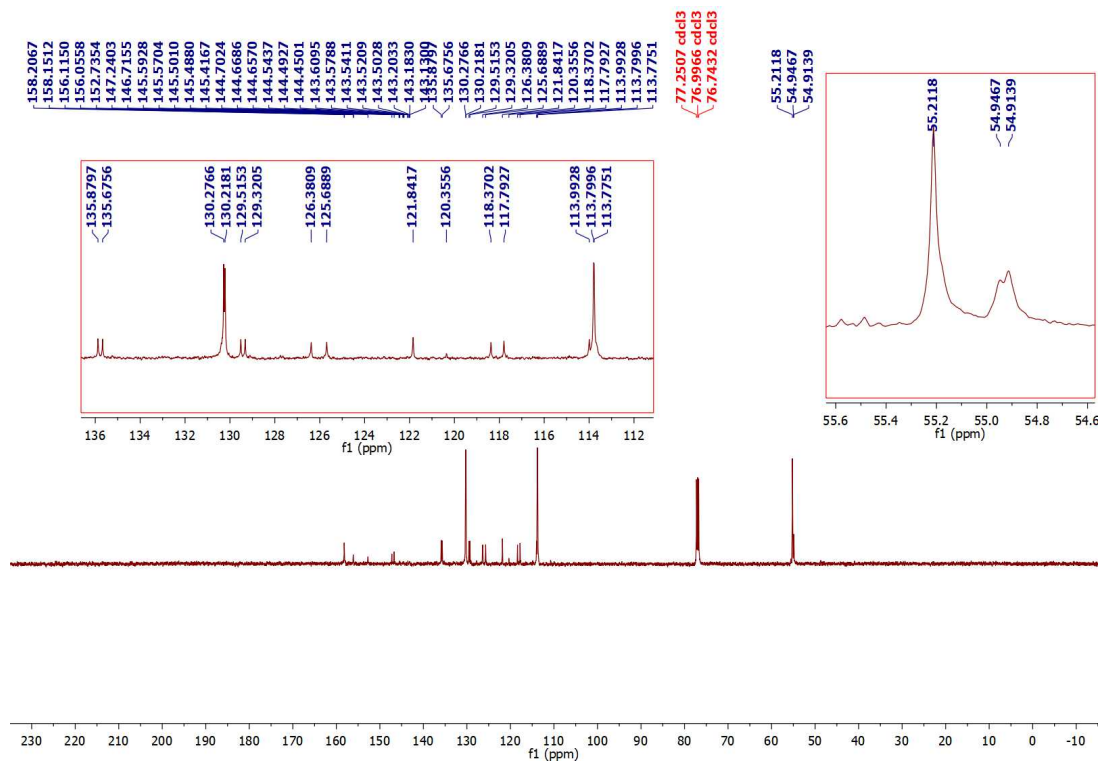

<sup>13</sup>C NMR spectrum of 2,4-Bis(3-(bis(4-methoxyphenyl)methyl)phenoxy)-3,5,6-trifluoropyridine **10c**



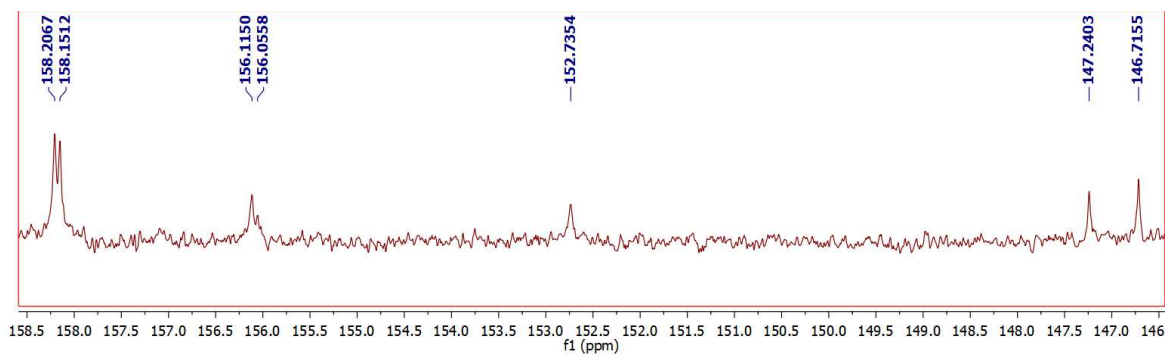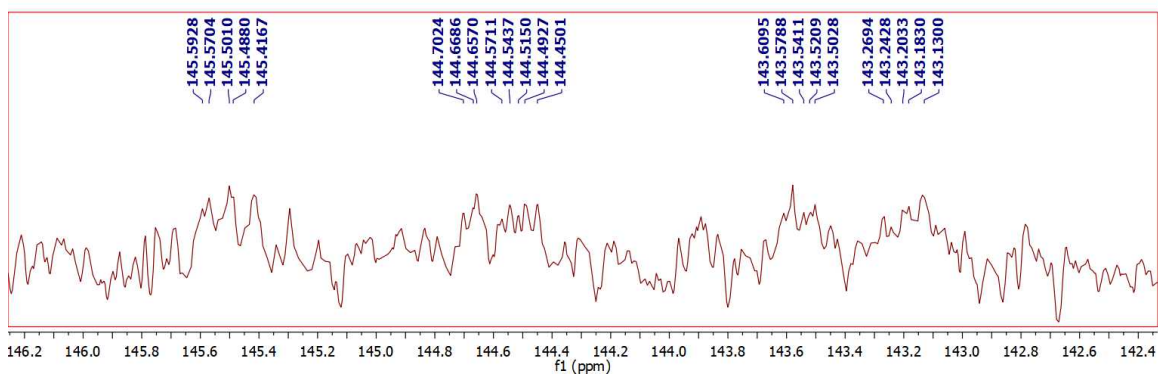

Expanded <sup>13</sup>C NMR spectrum of 2,4-Bis(3-(bis(4-methoxyphenyl)methyl)phenoxy)-3,5,6-trifluoropyridine **10c**

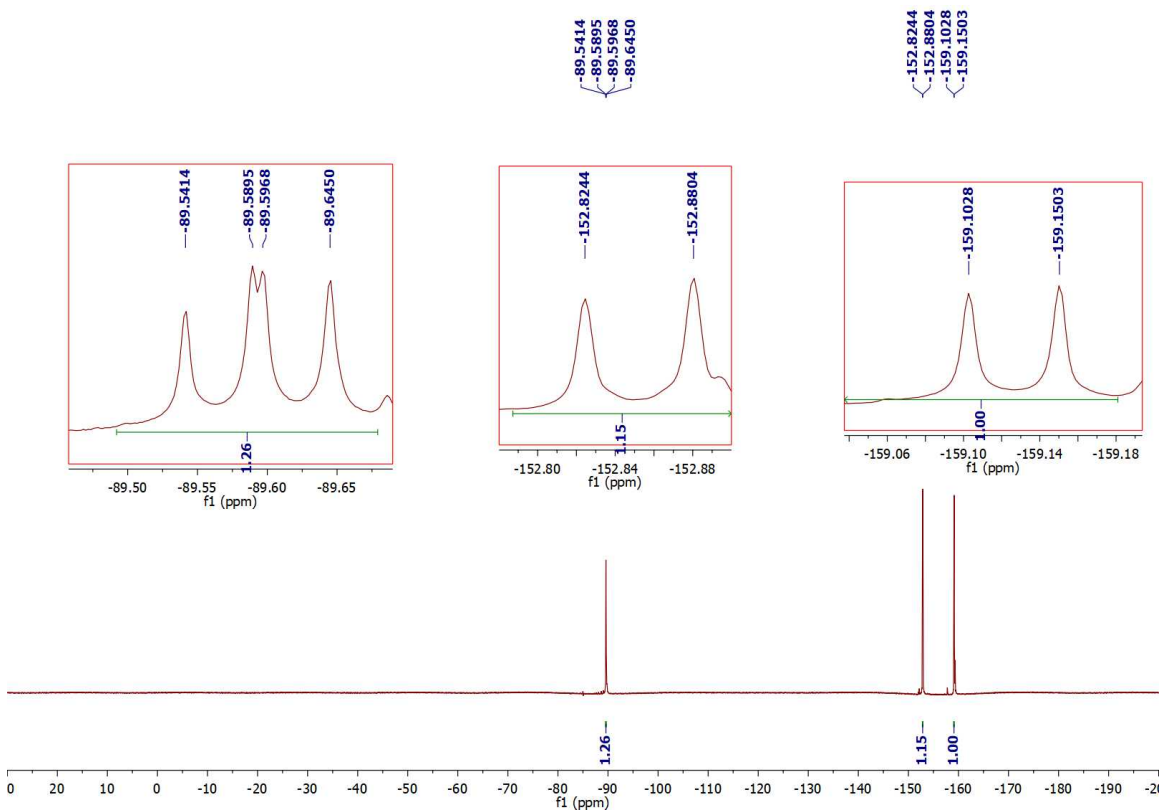

<sup>19</sup>F NMR spectrum of 2,4-Bis(3-(bis(4-methoxyphenyl)methyl)phenoxy)-3,5,6-trifluoropyridine **10c**

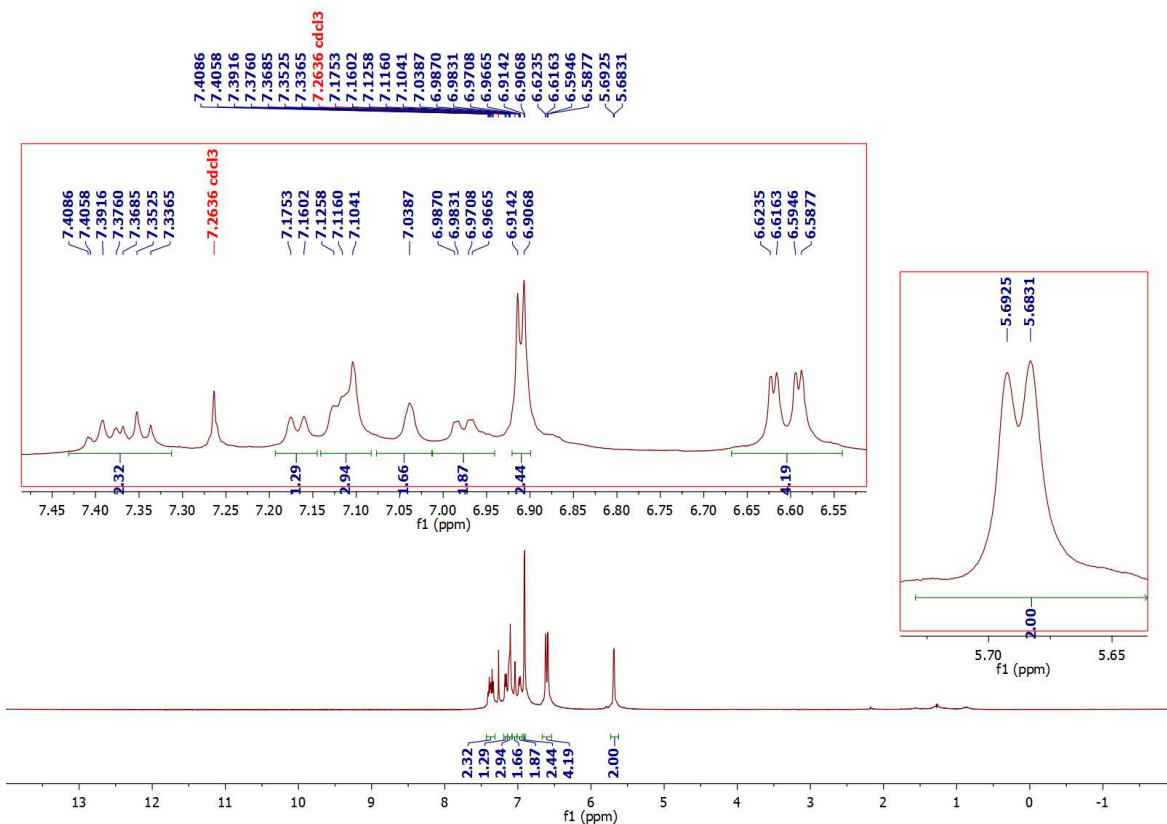

<sup>1</sup>H NMR spectrum of 2,4-Bis(3-(bis(5-bromothiophen-2-yl)methyl)phenoxy)-3,5,6-trifluoropyridine **10d**

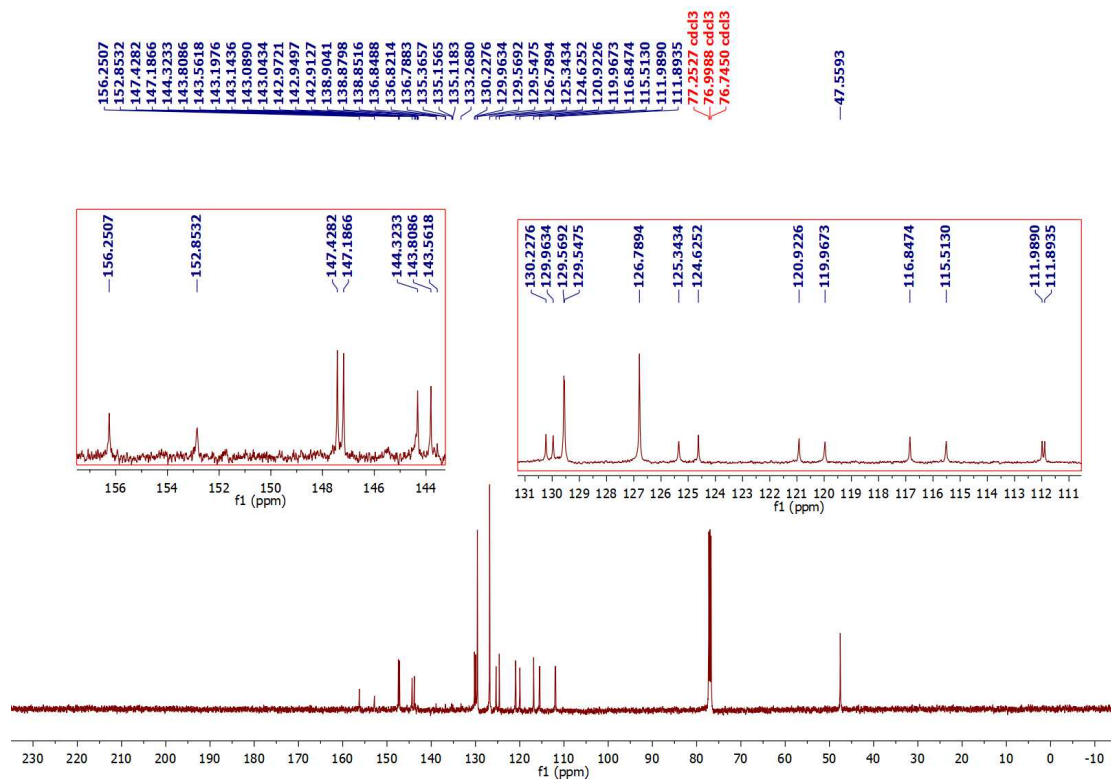

<sup>13</sup>C NMR spectrum of 2,4-Bis(3-(bis(5-bromothiophen-2-yl)methyl)phenoxy)-3,5,6-trifluoropyridine **10d**

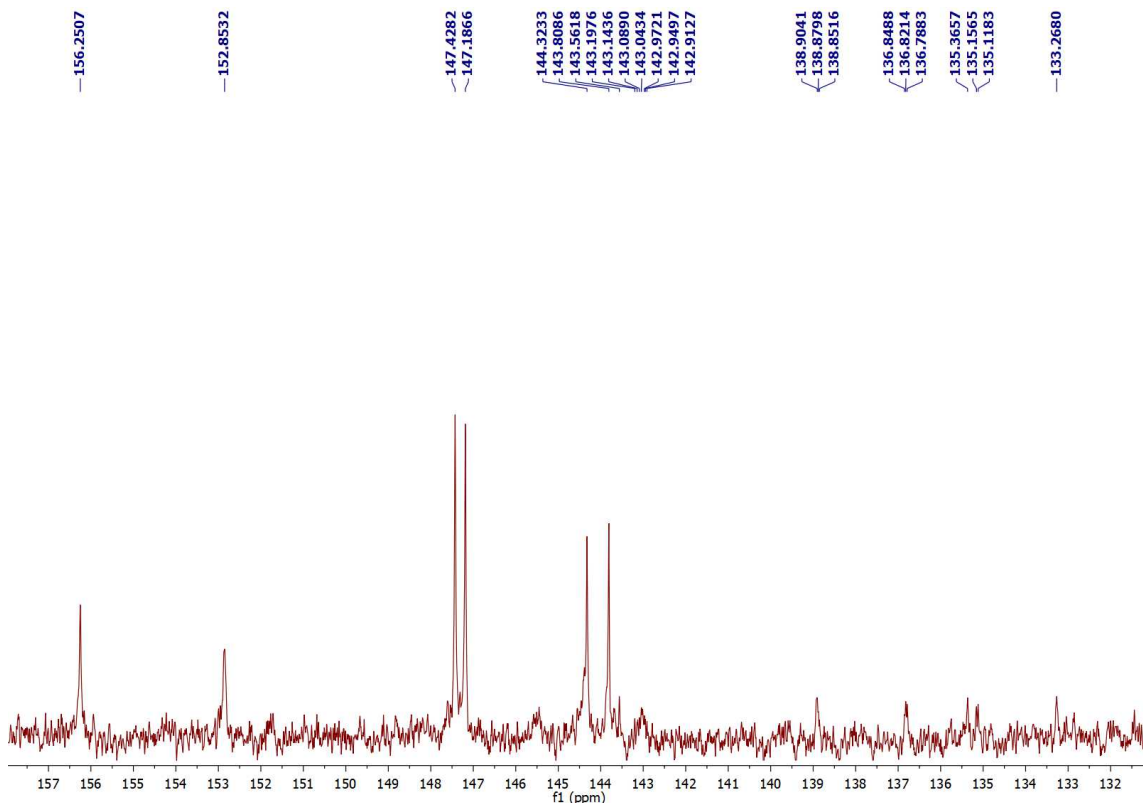

Expanded  $^{13}\text{C}$  NMR spectrum of 2,4-Bis(3-(bis(5-bromothiophen-2-yl)methyl)phenoxy)-3,5,6-trifluoropyridine **10d**

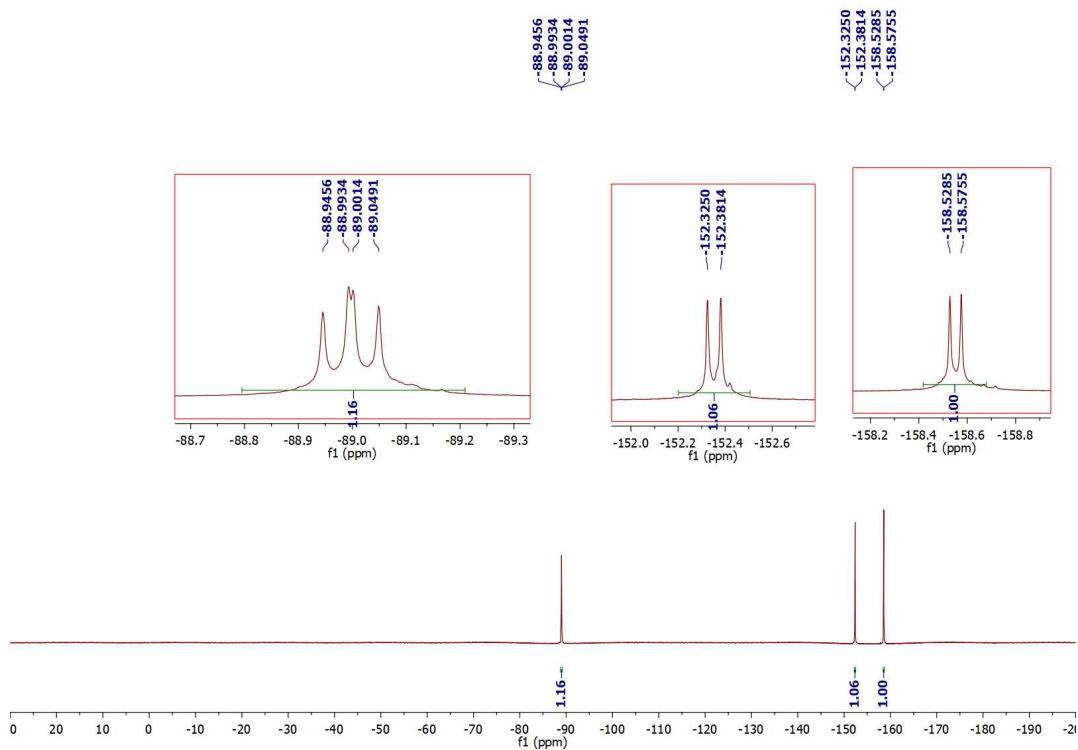

$^{19}\text{F}$  NMR spectrum of 2,4-Bis(3-(bis(5-bromothiophen-2-yl)methyl)phenoxy)-3,5,6-trifluoropyridine **10d**

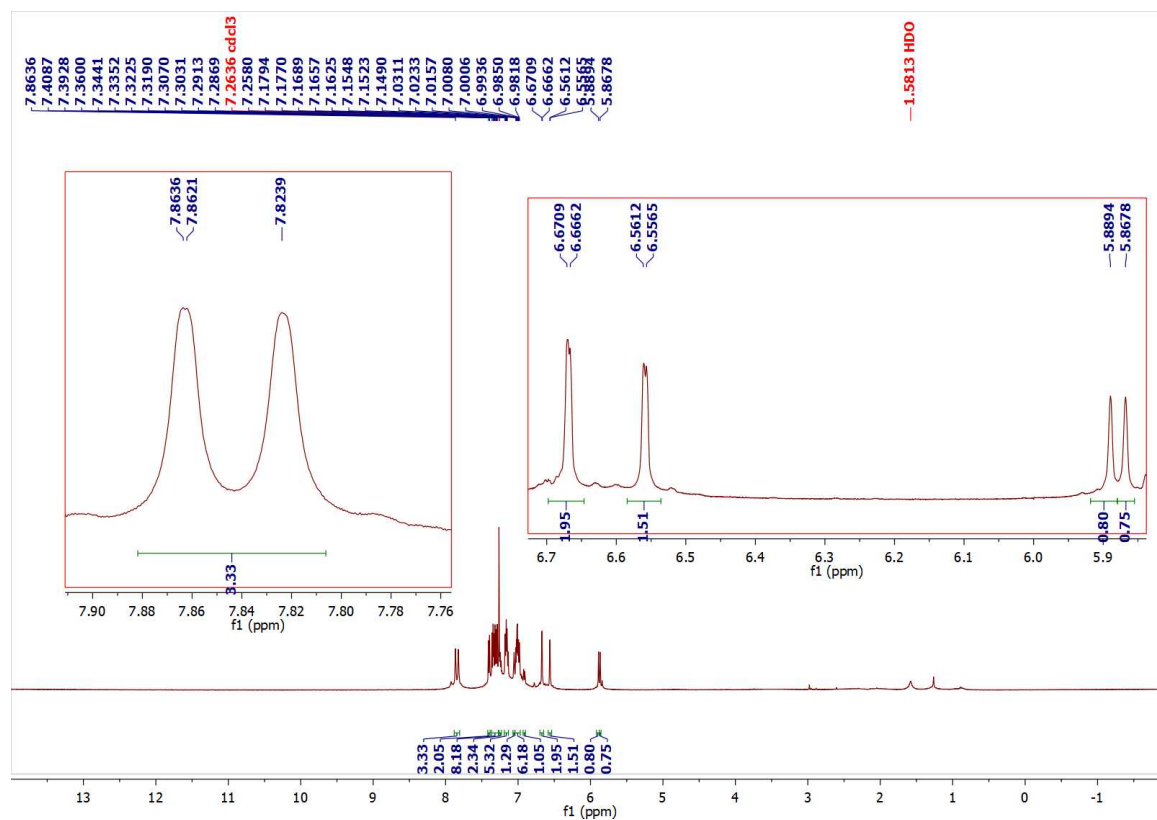

$^1\text{H}$  NMR spectrum of 3,3',3'',3'''-((((3,5,6-Trifluoropyridine-2,4-diyl)bis(oxy))bis(3,1-phenylene))bis(methanetriyl))tetrakis(1H-indole) **10e**

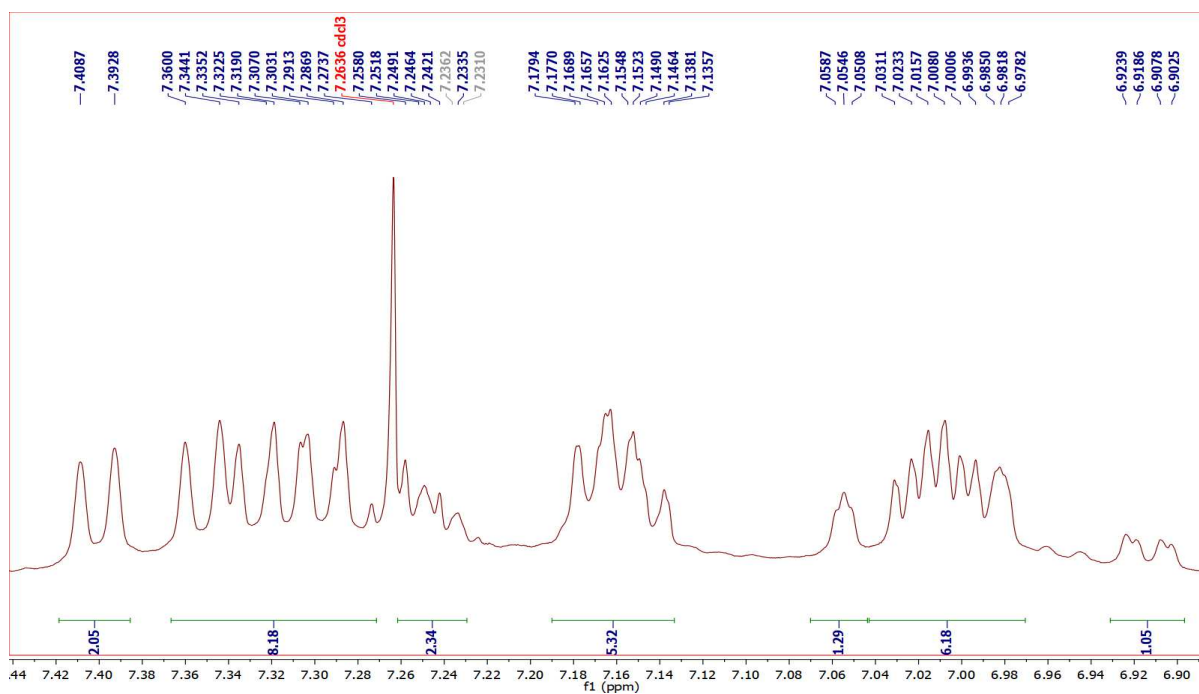

Expanded  $^1\text{H}$  NMR spectrum of 3,3',3'',3'''-((((3,5,6-Trifluoropyridine-2,4-diyl)bis(oxy))bis(3,1-phenylene))bis(methanetriyl))tetrakis(1H-indole) **10e**

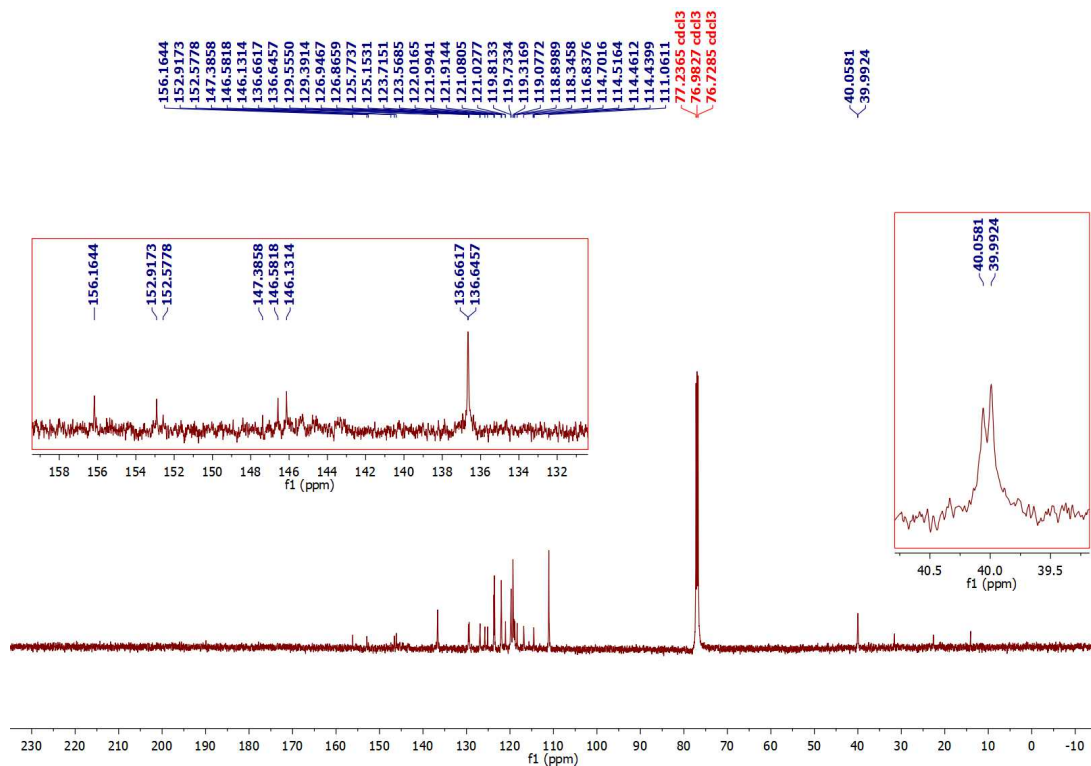

$^{13}\text{C}$  NMR spectrum of 3,3',3'',3'''-(((3,5,6-Trifluoropyridine-2,4-diyl)bis(oxy))bis(3,1-phenylene))bis(methanetriyl)tetrakis(1H-indole) **10e**

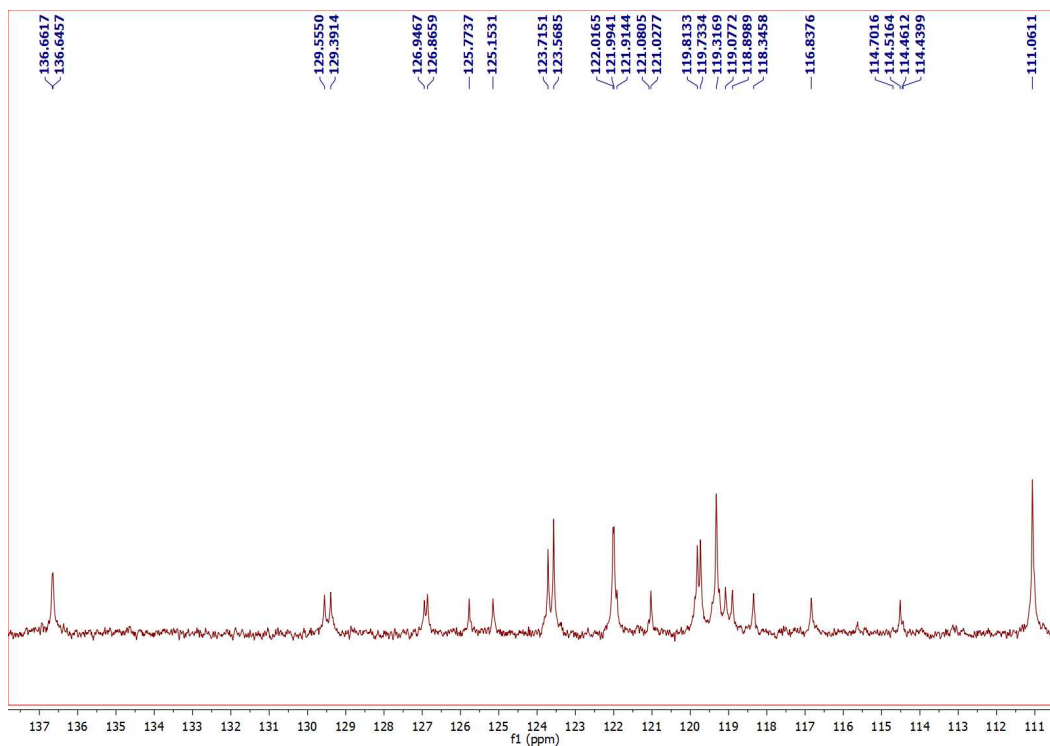

Expanded  $^{13}\text{C}$  NMR spectrum of 3,3',3'',3'''-(((3,5,6-Trifluoropyridine-2,4-diyl)bis(oxy))bis(3,1-phenylene))bis(methanetriyl)tetrakis(1H-indole) **10e**

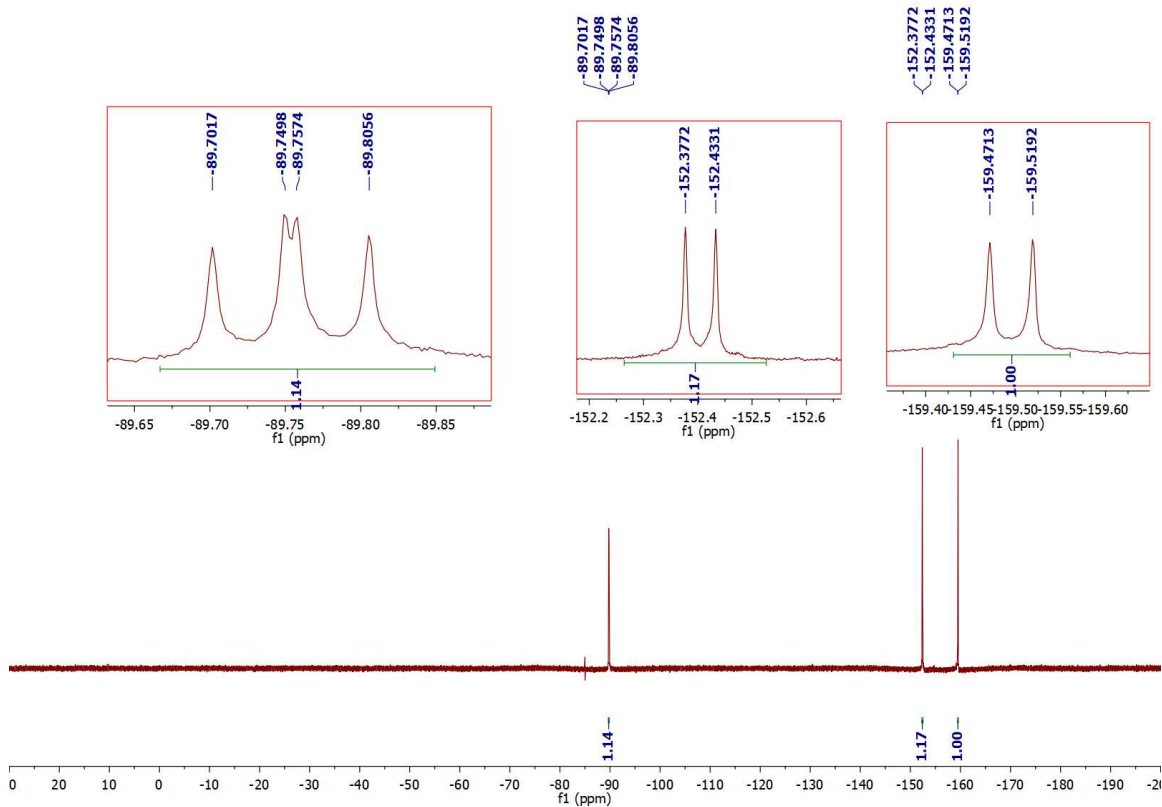

$^{19}\text{F}$  NMR spectrum of 3,3',3'',3'''-(((3,5,6-Trifluoropyridine-2,4-diyl)bis(oxy))bis(3,1-phenylene))bis(methanetriyl))tetrakis(1H-indole) **10e**

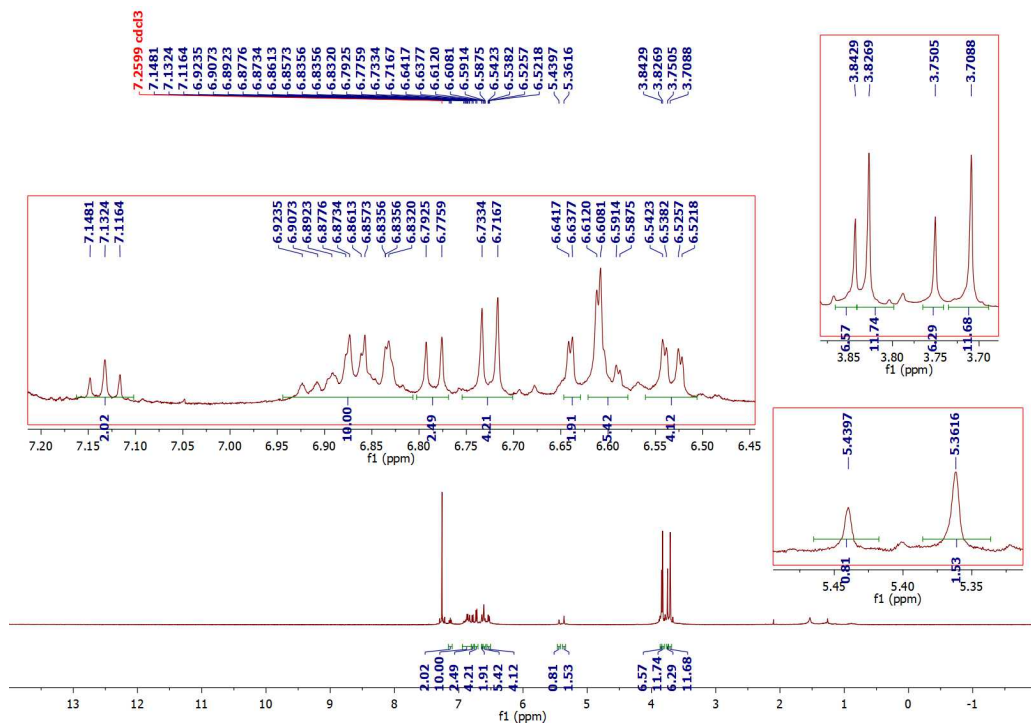

$^1\text{H}$  NMR spectrum of 2,4,6-Tris(3-(bis(3,4-dimethoxyphenyl)methyl)phenoxy)-3,5-difluoropyridine **10f**

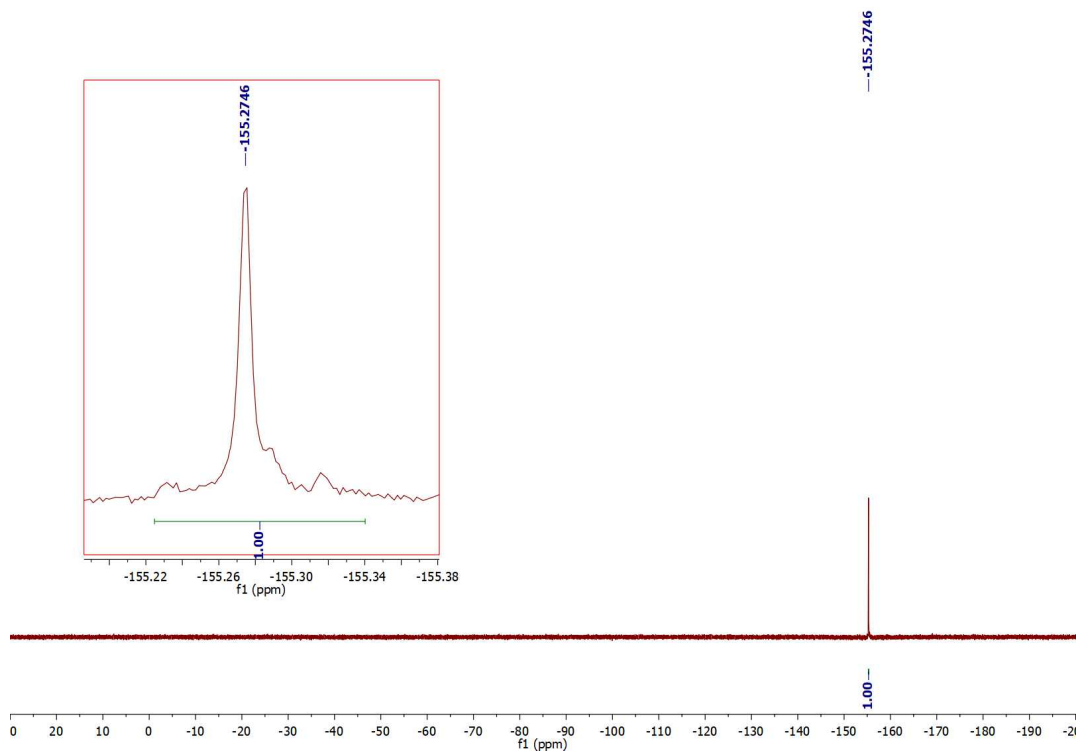

$^{19}\text{F}$  NMR spectrum of 2,4,6-Tris(3-(bis(3,4-dimethoxyphenyl)methyl)phenoxy)-3,5-difluoropyridine **10f**

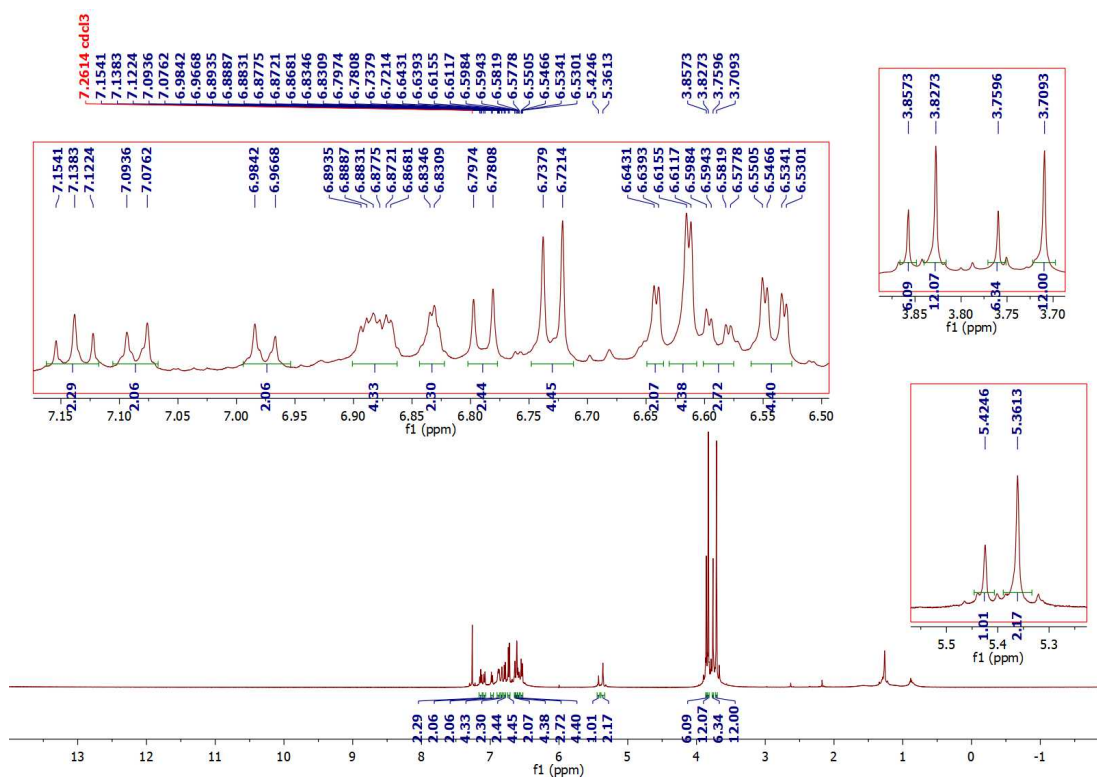

$^1\text{H}$  NMR spectrum of 2,6-Bis(3-(bis(3,4-dimethoxyphenyl)methyl)phenoxy)-4-(4-(bis(3,4-dimethoxyphenyl)methyl)phenoxy)-3,5-difluoropyridine **10g**

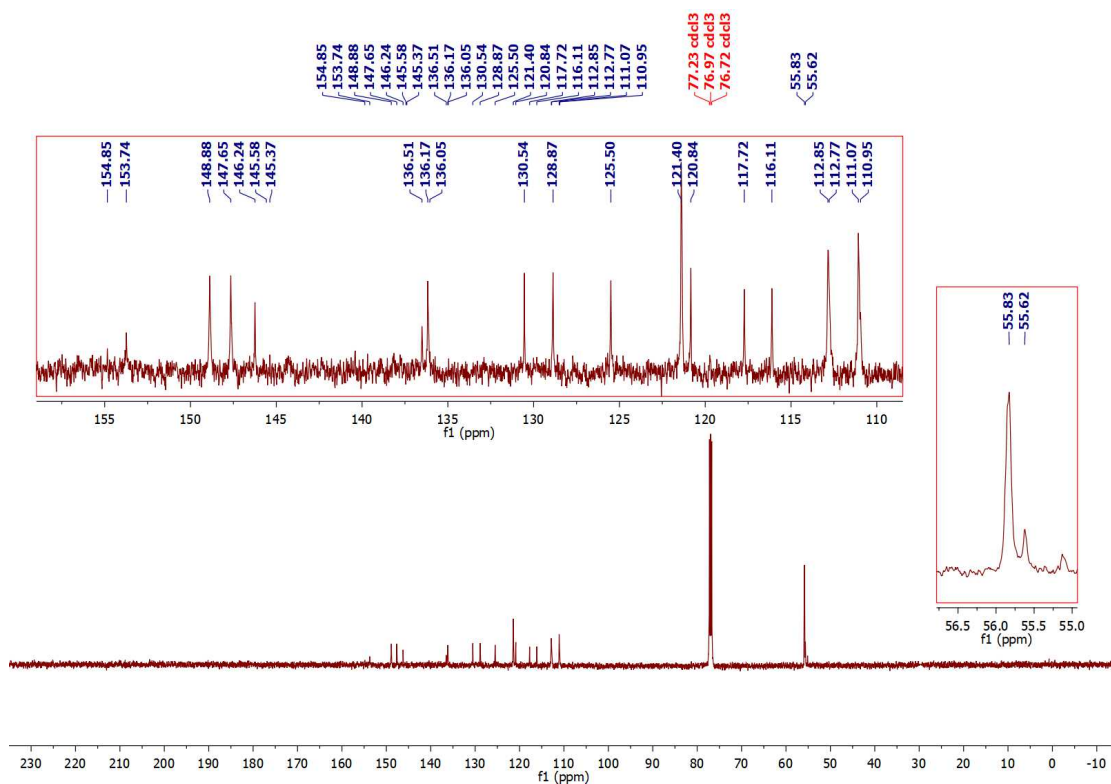

<sup>13</sup>C NMR spectrum of 2,6-Bis(3-(bis(3,4-dimethoxyphenyl)methyl)phenoxy)-4-(4-(bis(3,4-dimethoxyphenyl)methyl)phenoxy)-3,5-difluoropyridine **10g**

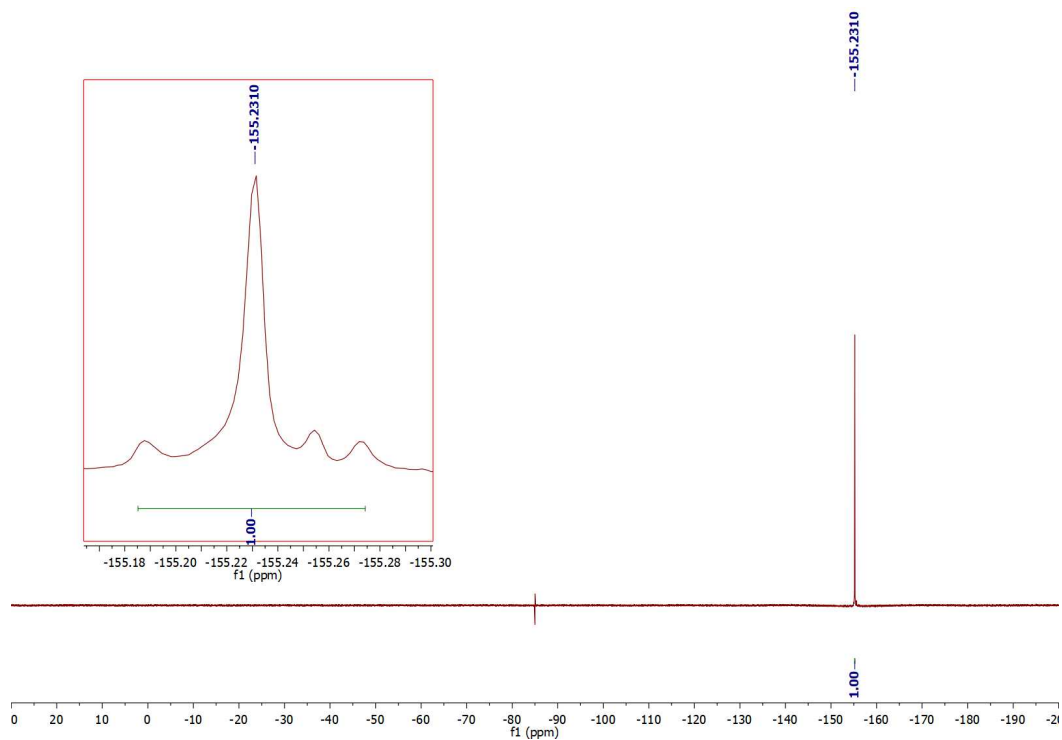

<sup>19</sup>F NMR spectrum of 2,6-Bis(3-(bis(3,4-dimethoxyphenyl)methyl)phenoxy)-4-(4-(bis(3,4-dimethoxyphenyl)methyl)phenoxy)-3,5-difluoropyridine **10g**



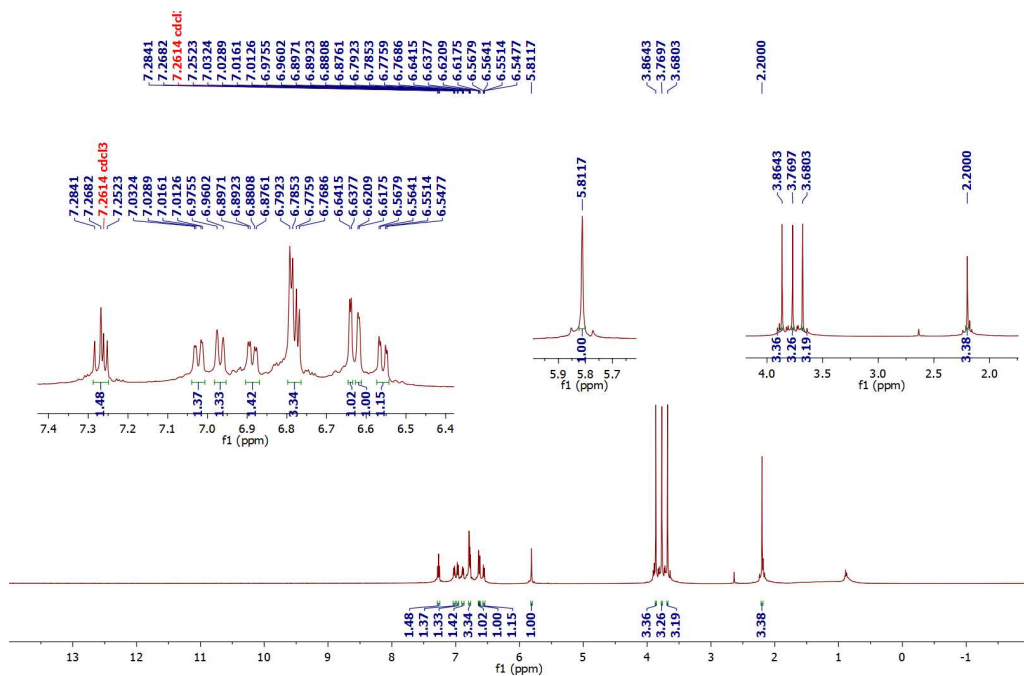

<sup>1</sup>H NMR spectrum of (R)-4-(3-((3,4-dimethoxyphenyl)(2-methoxy-5-methylphenyl)methyl)phenoxy)-2,3,5,6-tetrafluoropyridine **11a**

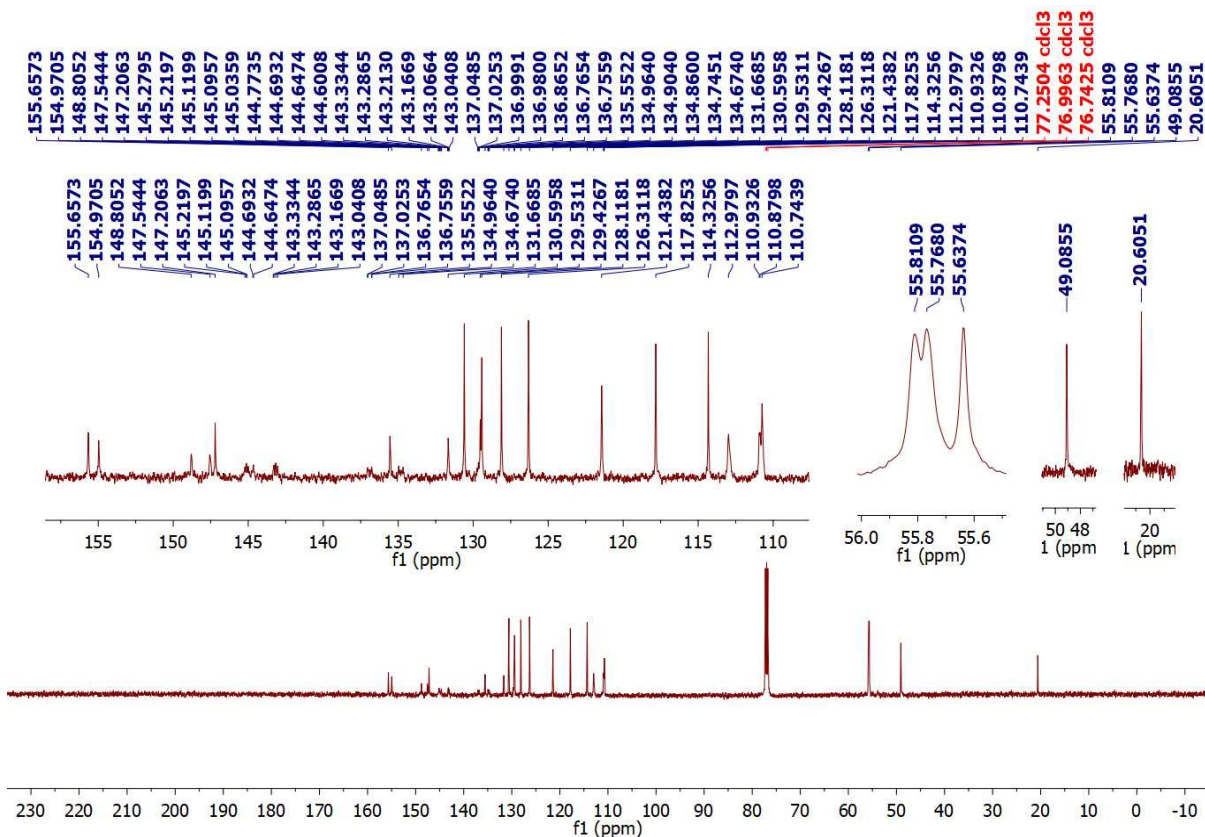

<sup>13</sup>C NMR spectrum of (R)-4-(3-((3,4-dimethoxyphenyl)(2-methoxy-5-methylphenyl)methyl)phenoxy)-2,3,5,6-tetrafluoropyridine **11a**

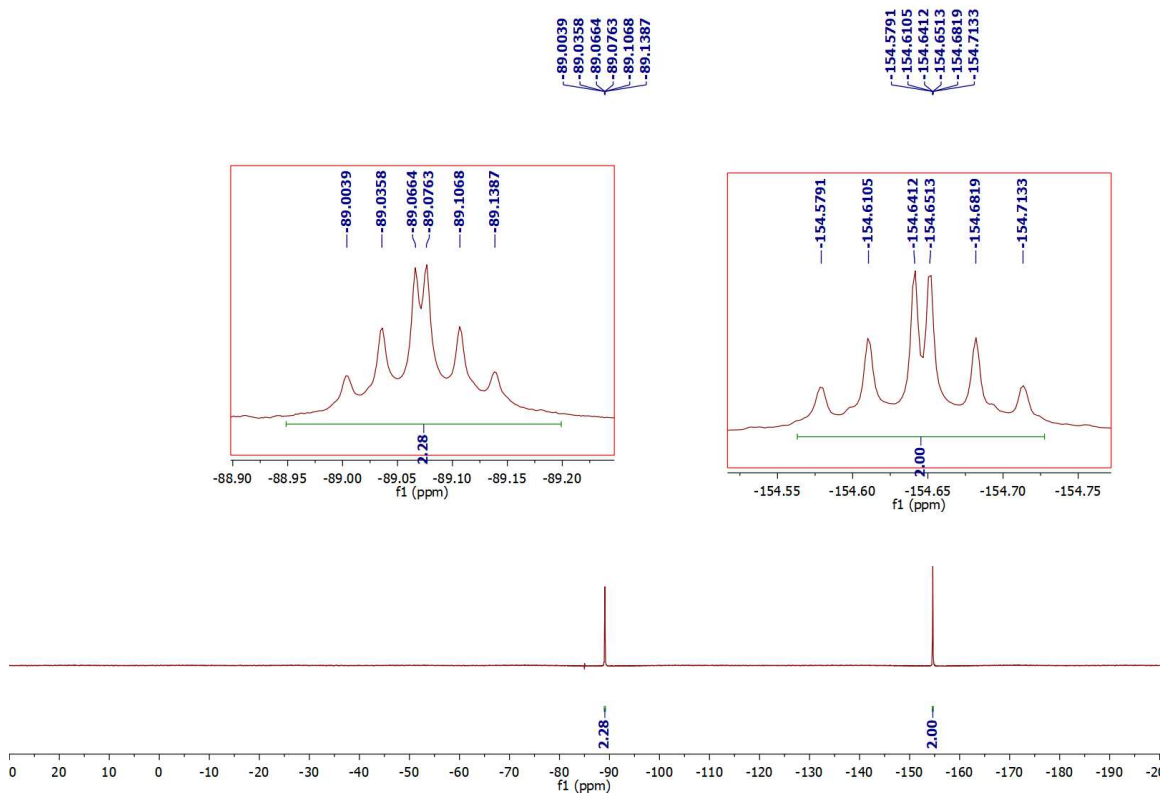

$^{19}\text{F}$  NMR spectrum of (R)-4-(3-((3,4-dimethoxyphenyl)(2-methoxy-5-methylphenyl)methyl)phenoxy)-2,3,5,6-tetrafluoropyridine **11a**

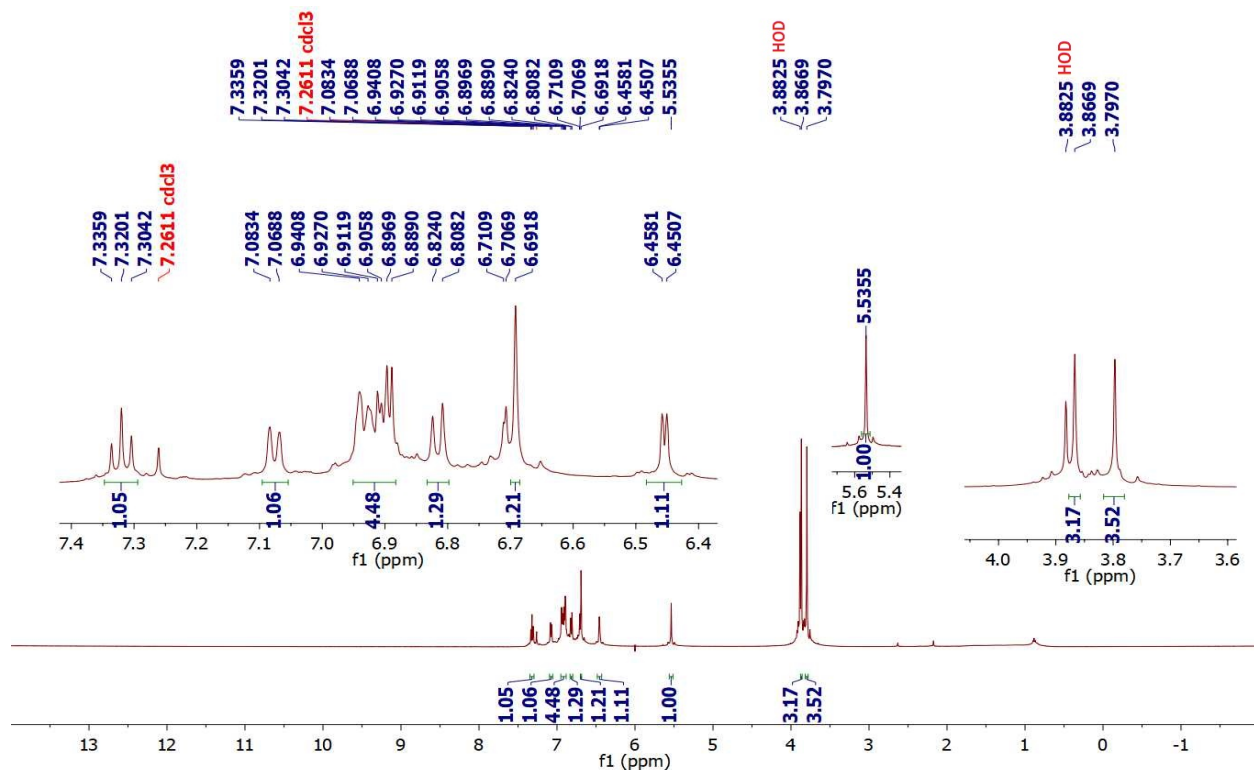

$^1\text{H}$  NMR spectrum of (R)-4-(3-((5-bromothiophen-2-yl)(3,4-dimethoxyphenyl)methyl)phenoxy)-2,3,5,6-tetrafluoropyridine **11b**

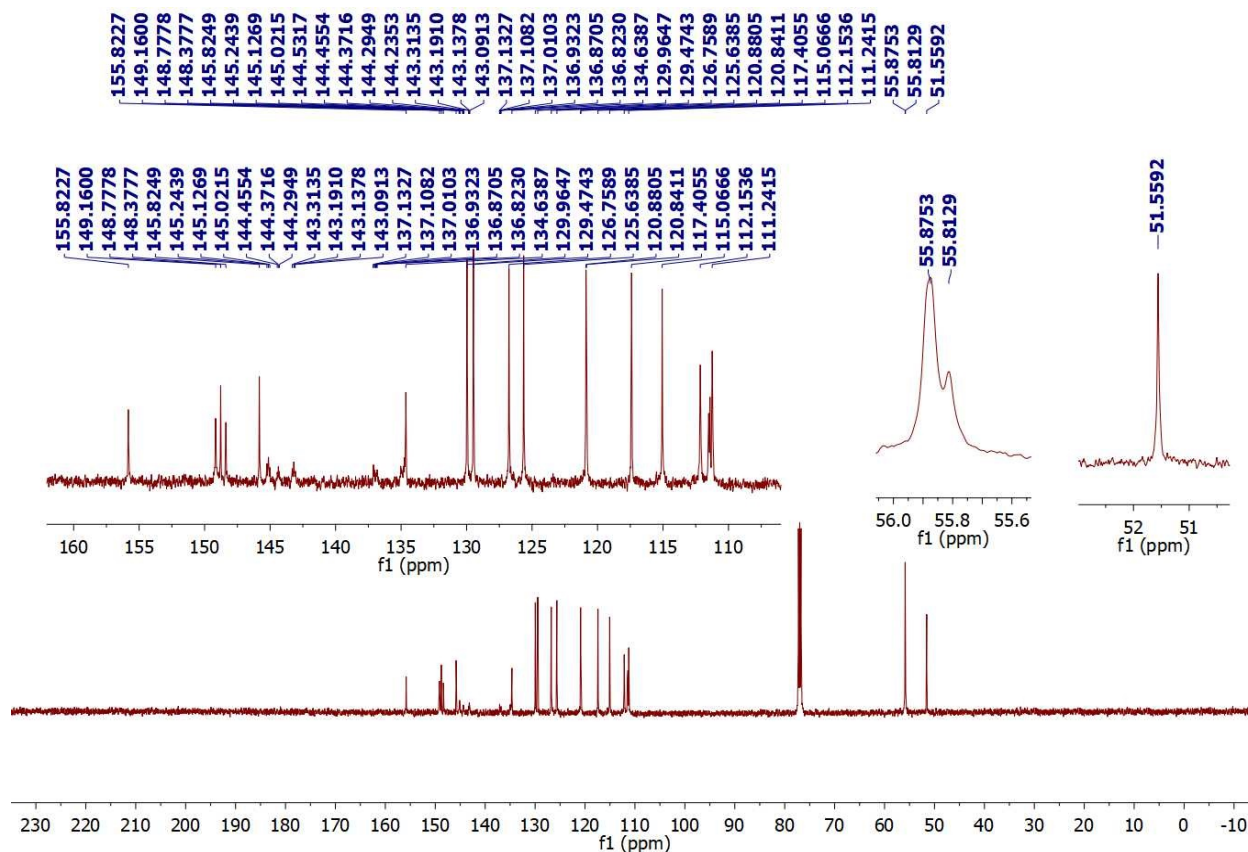

$^{13}\text{C}$  NMR spectrum of (R)-4-(3-((5-bromothiophen-2-yl)(3,4-dimethoxyphenyl)methyl)phenoxy)-2,3,5,6-tetrafluoropyridine **11b**

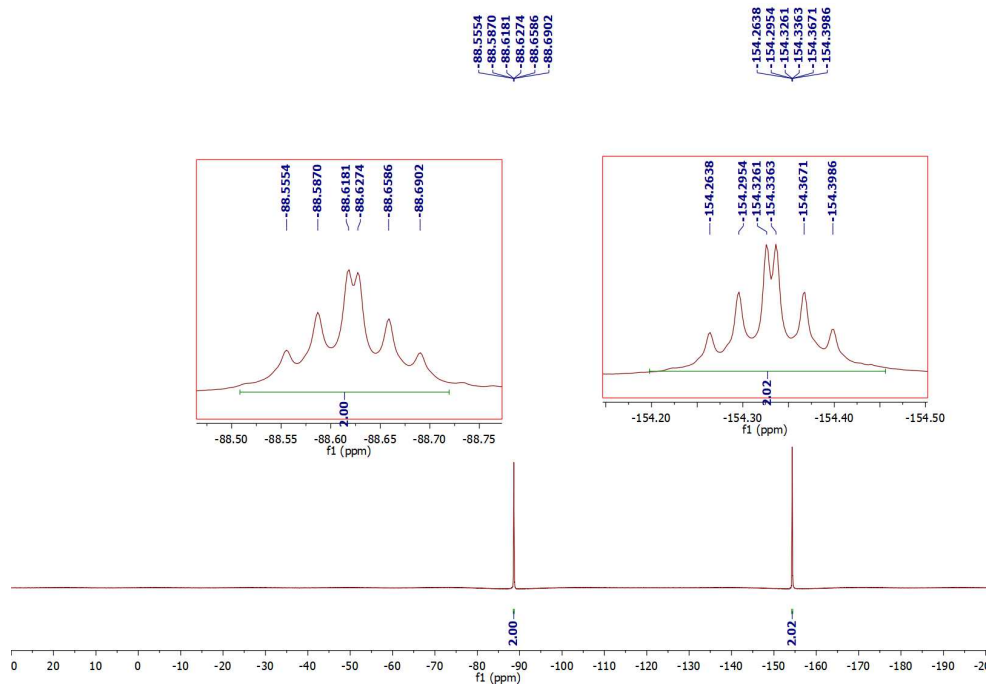

$^{19}\text{F}$  NMR spectrum of (R)-4-(3-((5-bromothiophen-2-yl)(3,4-dimethoxyphenyl)methyl)phenoxy)-2,3,5,6-tetrafluoropyridine **11b**
